# Supplementary material for: Pharmacogenomic Landscape of Ivermectin and Selective Antioxidants: Exploring Gene Interplay in the Context of Long COVID
Source: MDPI journal article supplement (doi:10.3390/ijms242015471), 2023-10-23
Supplement: s1 [file Table S1.xlsx]

## Sheet: 工作表1
Table S1.Chemicals and COVID-19 related gene sets
Chemicals and COVID-19 related gene sets from CTD
Quercetin (4151)	Curcumin (978)	Ivermectin (4674)	NAC (1076)	Covid19 (9888)	EGCG (2358)	Sesamin (16)	Anthocyanins (167)
TNF	TNF	ABCB1	CASP3	CCL2	IL1B	SOD2	TNF
CASP3	HMOX1	ABCB1A	HMOX1	IL6	CAT	CAT	CASP3
HMOX1	NFE2L2	NR1H4	TNF	TNF	PTGS2	IL6	IL17A
IL1B	CASP3	SLC2A4	MAPK1	CXCL8	TNF	NOS2	BCL2
NOS2	BCL2	ABCC1	MAPK3	IL10	CASP3	BAX	TGFB1
BCL2	RELA	CASP3	NFE2L2	IL1B	BMAL1	BCL2	CYP1A1
NFE2L2	IL1B	CAT	PARP1	IL2	MAPK1	CASP3	HMOX1
AKT1	PTGS2	MAP1LC3B	CASP9	AGT	MAPK3	CDH1	PTGS2
MAPK3	IL6	ESR1	SOD2	CCL3	AHR	CTNNB1	AKT1
CAT	CAT	BAX	BCL2	CXCL10	BAX	IL1B	BAX
BAX	BAX	SQSTM1	TP53	IL7	IL6	TNF	NOS2
MAPK1	CCND1	TNF	IL1B	UGCG	NFE2L2	AIFM1	AHR
IL6	NQO1	BCL2	BAX	MUC1	TP53	FADS1	NFE2L2
PTGS2	NOS2	CYP2E1	CXCL8	CCR2	BCL2	GSR	RELA
CYP1A1	MAPK1	GLC-1	DDIT3	CSF3	CYP1A1	PARP1	ACTA2
PARP1	MAPK3	DDIT3	RELA	BTK	AKT1	TH	IFNG
CASP9	MMP9	NCOA2	PTGS2	CRP	DDIT3		IL1A
RELA	AKT1	STAT3	AKT1	LZTFL1	HMOX1		MAPK1
TNFSF10	CDKN1A	ACACA	IL6	TMPRSS2	CCL2		MAPK3
IFNG	TP53	ANO1	MAPK8	PLSCR1	EGFR		PDGFA
INS1	VEGFA	GLC-2	CAT	IL2RA	NQO1		PDGFB
TP53	NFKBIA	GLRA1	JUN	CD209	NR1H4		STAT3
VEGFA	CASP9	HSPD1	NQO1	TMPRSS4	SOD2		AGT
MMP9	PPARG	JAK2	H2AX	IFNAR2	STAT3		CASP8
TGFB1	PARP1	MAP1LC3A	HSPA5	TMEM106B	CASP9		FYN
CCL2	BCL2L1	MAPK1	GSR	ICAM5	CDKN1A		CA1
CDKN1A	ICAM1	P2RX4	CASP8	IL10RB	CTNNB1		CA2
AR	AR	PFKM	NOS2	ATP11A	F2		CASP9
NFKBIA	ABCB1	SIN3A	MT2A	BCL11A	MCL1		CDH1
ABCB1	NFKB1	ABCB1B	SOD1	SELE	NOS2		IL6
CXCL8	CXCL8	ABCG2	CASP7	ABO	PARP1		NFKBIA
ESR1	CYP1A1	BECN1	CDKN1A	F8	RELA		NOS3
CASP8	ERBB2	CDH1	HIF1A	FUT2	BCL2L1		NQO1
GCLC	TGFB1	HK2	VEGFA	HCK	MFN2		PARP1
JUN	APP	HSP90AA1	CASP1	TYK2	F3		BAD
GSR	EGFR	HSPA5	CYP1A1	ACE2	GPX1		CSF2
AHR	STAT3	MAPK3	TNFSF10	BSG	KLF4		HIF1A
CCND1	DDIT3	MAPK8	MT1A	TP53	NR0B2		IL1B
SOD1	AGT	MXD1	MAPK9	NFKBIA	SLC31A1		IL23A
FOS	GCLC	NFKB1	STAT3	RELA	SOD1		PDE5A
ICAM1	GCLM	RPS6KA1	MMP9	CASP3	TGFB1		SELE
BCL2L1	MPO	ABCC4	MPO	NFKB1	VEGFA		TLR3
HIF1A	BIRC5	ACTB	ICAM1	NOS2	CDKN2A		TOP2A
MMP2	CTNNB1	AKT1	MAP1LC3B	BAX	CREB1		VCAM1
BIRC5	KLK3	ALB	CCND1	CASP8	EGF		VEGFA
SP1	SOD2	ATF4	FOS	ABCB1	GSR		BAK1
TLR4	TNFSF10	ATF6	SQSTM1	PCNA	MMP2		BCL2L1
HSPA5	XIAP	CCND1	BECN1	BCL2	MMP7		BID
NQO1	GSK3B	CEBPA	GPT	AKT1	MMP9		CASP10
ABCC1	MAPK8	CPT1A	IFNG	CDKN1A	SLC2A3		CAT
MCL1	AKR1B1	CXCL8	NLRP3	BBC3	ABCB11		CCN1
SOD2	CCL2	CYP3A4	TGFB1	ICAM1	ABCC1		CCNB1
STAT3	HIF1A	DYNC1I2	CYCS	SQSTM1	ACTA2		CDC25C
AGT	COL1A1	HMOX1	GCLC	PARP1	BDNF		CDK1
DDIT3	GSTP1	HSPA9	NFKB1	SERPINE1	CCND1		DUSP1
NOS3	IL10	IL1B	NFKBIA	SOD2	CXCL1		ICAM1
CYP1A2	JUN	INS1	ATF4	IL1A	CXCL8		IL17RA
EGFR	ACHE	LONP1	CCL2	FOS	CYP2E1		MMP9
ESR2	AHR	MAPK14	ATM	IFNG	DNMT1		MPO
TNFRSF10B	CASP8	MGST1	CD86	TGFB1	EGR1		PCNA
COL1A1	CDKN1B	NOS2	FASLG	COL1A1	ENOX2		PIK3CA
PPARG	IFNG	NQO1	INS1	PPARG	GADD45A		PIK3R1
SIRT1	CYP2E1	PCNA	NOS3	HSPA5	GLI1		PPARG
ACTA2	EGF	PGP-12	AIFM1	CCND1	GLUD1		TP53I3
EGF	INS	PPARG	BCL2L1	CYP3A4	GPT		VIM
TGFA	KEAP1	SERPINE1	EIF2S1	ESR1	H2AX		AGER
CYP3A4	MMP2	STAT5	MAPK14	GPT	HGF		AKT2
ERBB2	PRKCD	TUBB3	MTOR	CTSL	HIF1A		ALOX15
INS	SOD1	ATF5	TRP53	NR1H4	IGF1R		ARNT
NFKB1	TLR4	ATG4B	ACHE	STAT3	MAPK8		ATM
VCAM1	ACTA2	BAG3	AHR	CASP7	MLH1		AVP
CTNNB1	EP300	BCL2L13	CYP2E1	SRC	MT2A		B2M
EGR1	RAD51	CAMP	EGFR	BECN1	MYC		BTG2
GPX1	WWTR1	CCL2	MYD88	CPT1A	PDHA1		CASP1
PRKAA1	BIRC2	CCT3	CDH1	MCL1	RARB		CCL2
BAD	BIRC3	CD74	CTNNB1	HMOX1	SLC51A		CCN2
BGLAP	CASP7	CDKN1A	EGF	CDH1	SLCO1A2		CDH2
CCNB1	EGR1	CDKN1B	GSK3B	BCL2L1	TRP53		CDKN1A
CXCL10	GPT	COL4A1	TNFRSF10B	CD36	UBA7		CDKN1B
GCLM	HDAC1	COX6A2	ALB	ABCC2	VCAM1		CHEK1
NCF1	IL18	CTSL	BAK1	MAP1LC3B	ACE		CHEK2
SHH	ALDH1A1	CYP1A1	EIF2AK3	STAT1	ARNT		CIDEA
TYR	BDNF	CYP1B1	ERN1	MYC	BECN1		CLDN4
ABCA1	CYP1A2	CYP2B10	GADD45A	VEGFA	CASP8		COL1A1
CYP1B1	ERCC1	CYP2D6	GSTA4	GLB1	CLOCK		COL3A1
FASN	GSR	CYP3A11	LHB	ACTA2	COL3A1		CREM
GPT	MYC	DAO	SLC22A6	NOS3	CYP19A1		CTNNB1
HMGB1	VCAM1	DDX5	XBP1	CS	DAPK1		CTSD
MTOR	ARNT	DNAJB1	XRCC1	PTGS2	FBN1		CXCL2
PPARA	BAK1	DPYSL2	CCL3	MKI67	GSK3B		CYCS
ALOX15	CASP1	DYF-7	IL10	HIF1A	GSTO1		CYP11A1
CSF2	CCN2	EBF3	IL1A	BAK1	GUSB		CYP1A2
CYCS	CD40	EDN1	PPARG	ALB	H1-5		CYP2C
MAPK8	CFTR	EGR3	ATF6	IL4	HMGCR		CYP2E1
NLRP3	CREB1	EIF2AK3	BID	RUNX2	HMGCS1		CYP3A2
BID	CYP3A4	EIF2S1.S	CDKN1B	MAP2K1	IL1A		CYP3A23-3A1
CAV1	FN1	ERN1	CDKN2A	MT2A	INS1		DNMT1
CDH1	IKBKB	FABP4	CXCL1	CTSK	KDR		DNMT3B
CYP2E1	LDLR	FASN	FAS	PPARA	MFN1		EGFR
FAS	MAPK9	GABRQ	GSTM1	MYH7	MGMT		EPAS1
MIR21	PECAM1	GDF15	IL18	LEP	MIR122		ERBB2
PON1	POU5F1	GREB1	MMP2	CYP27A1	MMP1		FADD
XBP1	TNFRSF10B	GSTP1	SNAI1	FABP5	MT1X		FAS
APP	VDR	HSP90	TET1	RB1	NOS3		FASLG
CD36	ALB	HSP90AB1	VCAM1	TLR4	PDGFRB		FSHB
CXCL2	CD36	HSPA1A	ABCB1	JUN	PIK3R1		FSHR
EP300	DNMT1	HSPA2	APOB	MMP9	PLD1		GCLC
LEP	ESR1	HSPA4	APP	CREB1	PLD2		GCLM
MPO	FASLG	HSPA8	ATG5	MAP2	PPARGC1A		GNRH1
S100B	MAP1LC3B	HSPE1	CASP12	MMP2	PPP1R15A		GSK3B
ALB	MIR125A	HSPH1	CD36	MAPK8	RHOBTB1		GSR
APOB	PCNA	IGFBP3	COL1A1	CAT	RPS3A		GUSB
CASP7	SIRT6	IL6	CSF2	EDN1	SLC30A1		H2AX
CDK2	TGFBR1	KLK6	CYP1A2	INS1	SLC51B		HAVCR1
CEBPB	ABCA1	KPNA4	CYP3A4	CASP9	SMAD4		HBEGF
EDN1	ABCB1B	KTN1	FN1	HK2	SQSTM1		HDAC1
MAPK9	ABCC5	MAB21L2	FOXO3	APP	SREBF1		HDAC2
MMP1	ADIPOQ	MAPK9	HSP90B1	CTNNB1	TERT		HDAC3
PLAT	CHUK	MRP-1	MUC5AC	CASP12	TLR4		HDAC4
SLC22A6	CRP	MRP-6	MYC	DDIT3	TRANK1		HDAC7
SREBF1	CXCL2	MYBL1	NCF1	MAP1LC3A	TXN		HIF3A
UGT1A1	FOS	NANOG	NOX4	CYP2D6	ABCA1		HLCS
ACHE	HMGCR	NFE2L2	PRKAA1	ABCB11	ABCB1		HSD17B7
CASP1	IGF1	NPC1	SMAD3	FAS	ABCG1		HSD3B
CREB1	IGF1R	NPC2	STAR	HSF1	ABCG2		IKBKB
FASLG	MDM2	NPPB	STAT1	CCNA2	ADAMTS15		IL10
GSTP1	NAIP	PARP1	TGFBR1	CYP2C9	ADAMTS5		JAK1
HSPA1A	PDGFRB	PCK1	TXN	ABCB1A	AFF1		JAK2
IRS1	PPARGC1A	PFKFB3	VIM	CYP3A23-3A1	AHCY		JAK3
LDLR	RPS6	PFKL	ADIPOQ	EIF2S1	AKAP13		JUN
PPARGC1A	SELE	PGK1	ATG12	RAF1	ANAPC10		KISS1
PRKCD	SRC	PGP-1	CASP2	TIMP2	APC		LCN2
RUNX2	UGT1A1	PGP-11	CCL11	NFE2L2	AQP1		LHB
SERPINE1	ABCC2	PGP-14	CHEK2	CCND2	AR		MAP2K4
SREBF2	ACACA	PGP-2	CSF1R	CTSB	ATP2B4		MAPK14
TIMP1	ATF3	PGP-4	DNMT1	SPIRE1	ATXN7L1		MAPK8
TOLLIP	CBR1	PLAUR	EDN1	ACOX1	BCL3		MMP2
ABCC4	CHEK2	PNP	GGT1	EIF4H	BIRC5		MTOR
CHUK	COL2A1	POU5F1	GPX1	NCF2	BLTP1		NBN
JAK2	CXCL1	PPARA	GSTE6	CADPS	BNIP3		NFE2
MYC	CYCS	PPID	GSTT1	RO60	BRCA1		NLRP3
PDCD4	CYP1B1	PPIF	IL2	EGFR	BTG1		PCBP4
POMC	DVL1	PTGES3	MCL1	MAPK3	C3ORF14		PGK1
SMAD3	EIF4EBP1	PTGS2	MMP1	CYBB	CBLB		PIAS3
STAT1	ERBB3	RDL	PIK3R1	MAPK1	CCDC167		PIK3CB
TFRC	ERCC4	RET	PKM	MAPT	CCDC91		PLA2G2A
TLR7	GADD45A	RPL9	PTEN	CXCL1	CCNG1		PLCD4
XDH	GPX1	RPS6	RB1	SCD1	CDH1		POR
APOA1	H2AX	RPS6KA5	RPS6KB1	EEF1A1	CDK6		PRKACA
CASP10	HMGB1	RSF1	SIRT1	BDNF	CHAC2		PTGS1
CDH2	HSPA5	SGK1	SP1	COL3A1	CHCHD1		PYCARD
CYP19A1	IGFBP3	SLC10A4	TGFB3	TRIB3	CNOT2		RPS6KA5
FSHB	IVL	SLC18A2	TNFSF11	COL1A2	COA6		SMAD2
GSK3B	MTOR	SLC2A1	VDAC1	MTTP	COL1A1		SNAI1
HGF	MYH7	SOD2	ABCC1	CEBPA	COX17		SNAI2
KLK3	NLRP3	SOX2	ABCC2	MTOR	COX2		SNCA
MIR27A	PDGFB	ST13	ALPL	CD74	COX4		STAR
NR1I2	PDK1	TBC1D2	APOE	MT1M	COX6C		STAT1
PCNA	PLAU	TCP1	ATG7	CYP7A1	CRADD		TGFBR1
PTK2	SERPINB5	TFRC	BIRC5	PENK	CRP		TIMP1
RPS6KB1	TGFBR2	TTR	CCN1	GSR	CSPG4		TJP1
SLC2A4	TH	A2ML1.L	CLDN1	NR3C1	CTSD		TLR4
SRC	TMPRSS2	AAAS	CLDN4	H2AX	CYBB		TOP1
STAR	TOP2A	AACS	EIF2A	VIM	CYP1A2		TXNIP
TNFSF11	TRP53	AAGAB	EZH2	CYP1B1	CYP7A1		TXNRD1
ABCG2	ABCC1	AAK1	HSF1	FASLG	DDX60		UCP2
APOE	ABCC4	AAMDC	IGF1	MIR379	DGKH		XDH
BMP2	BAD	AAR2	IL4	FASN	DHFR
CCNE1	BBC3	AARS1	INS	RCN2	DIABLO
CDKN1B	CCNE1	AARS2	KL	BIRC5	DNAJC19
CREBBP	CDH1	AASDHPPT	LAMP1	HAVCR1	DNMT3B
CYP11A1	CDH2	AASS	MAP3K5	CYP2E1	DUSP5
HSP90AA1	CDK1	AASS.L	MT1X	VDAC1	DYNLT1
HSPB1	CDK2	AATF	NLGN3	MYLK	EDN1
IL10	CHEK1	ABAT	NRXN1	CYP1A2	EFNB2
IL18	COL4A1	ABAT.L	OCLN	IGF1	EHHADH
IL1A	CRYAB	ABCA3	OLR1	FABP4	EPG5
ITGB1	DIABLO	ABCB6	PARK7	PRMT5	ERCC1
LHB	DKK1	ABCB7	PDGFB	ATF4	ERCC4
MET	ELK1	ABCC2	PDGFRB	GJA1	ESR2
MMP3	EPCAM	ABCC9	PPARGC1A	MIR151	ETFRF1
OCLN	F2	ABCD3	PTPN1	ABCB1B	FAM162A
PTEN	FOSL1	ABCE1	PYCARD	GSK3B	FAN1
RB1	GFAP	ABCF1	SESN2	KRT19	FASN
SELE	GLI1	ABCF2	SHC1	CSE1L	FAT1
SLC11A2	GPAM	ABCF3	SPTAN1	MBP	FAT4
SLC22A1	GRIN1	ABCG1	SRXN1	NR1H3	FGF15
SLC22A8	HAVCR1	ABHD10	TERT	PPT1	FGF2
SMAD2	HCK	ABHD11	TJP1	IL12B	FIS1
SPP1	HDAC2	ABHD12	TLR4	SOD1	FOS
TJP1	HSPA1A	ABHD14B	UCP2	PPM1B	FRY
TRP53	IFNA1	ABHD16A	XIAP	ATP1A3	GCLC
ZBTB10	IFNB1	ABI1	ACTA2	MPST	GIN1
ADA	IL2	ABI2	AGT	RAC1	GLI3
CDK1	IL4	ABR	ATF2	POLR2A	GLIS3
CEBPA	JUNB	ABRACL	ATP6V0D2	BGLAP	GPR21
CPT1A	KDR	ABRAXAS2	CASP4	LMNA	GSS
CRP	KRAS	ACAA1	CAV1	MYH11	GSTM2
CYP2C8	MAP2K1	ACAA2	CCL5	CCNE1	HAUS1
DNMT1	MAP2K2	ACAD11	CCNB1	IGF2	HBEGF
F2	MGMT	ACAD8	CCND2	PDGFB	HEATR5A
G6PD	MMP3	ACAD9	CXCL2	CEBPB	HERC1
GLI1	MST1R	ACADL	DGAT2	REN	HIVEP1
GPX2	NANOG	ACADM	DIO2	SNAI1	HIVEP2
GSTA1	NKX3-1	ACADSB	DNM1L	RHEB	HK2
IBSP	NOS3	ACADVL	EIF4EBP1	STAT4	HMGA1
IGF1	NOTCH1	ACAP2	FGF21	GCLC	HRAS
IGF1R	PROM1	ACAT1	GADD45G	NEDD4	HTATIP2
IL4	RB1	ACAT2	GCLM	MAL	IFIH1
KDR	REL	ACBD3	HIF-1	OPTN	IFIT1
KEAP1	RPS6KB1	ACBD5	HSPA1B	DYNC1H1	IFNG
MCOLN1	SELP	ACIN1	IL12B	SLC39A10	IGF1
MDM2	SIRT3	ACIN1.S	JAK2	ACADS	IKBKB
MKI67	SOX9	ACKR1	MMP3	CYP2B10	IL10RB
MMP13	TIMP1	ACLY	MT1F	BNIP3	IL27RA
PLAU	TRAF1	ACO1	MT1G	MYH10	ITGB3BP
PRKCA	TXNRD1	ACO2	NGF	PKM	ITGB4
PYCARD	UBA7	ACOD1LB.L	NR3C1	IL17A	ITPR2
RAF1	VIP	ACOT1	PGR	CCL9	JAK3
SLC39A14	WNT3	ACOT12.L	PMAIP1	NPPB	JUN
SLC5A1	WT1	ACOT13	PPP5C	HSPA1B	KEAP1
SMAD4	ABCG2	ACOT7	PRKCD	FOXO1	KMT2C
SP4	AKT2	ACOT9	PRKN	PTPRD	LDLR
TXNRD1	ALAD	ACOX1	SLC1A2	NCF1	LMNB1
VIM	ALOX5	ACP1	SNCA	GLUL	LRR1
ACACA	APAF1	ACP2	SOD3	CCL5	LRRFIP1
AIFM1	ATM	ACP5	SRC	TNFAIP3	LSM6
APAF1	BACE1	ACSF2	TALDO1	TYMS	MACF1
BECN1	BID	ACSF3	TFEB	AR	MAP1LC3B
BMI1	CCNB1	ACSL1	TGFBR2	HGF	MAPK14
CCL5	CDK4	ACSL3	THPO	CXCL2	MBD5
CCN2	CEBPA	ACSL4	TIMP3	MIR31	MCTS1
CD40	CFLAR	ACSS2	UBA7	CYP4A10	MID1
CDKN2A	CTSD	ACTA1	ABCA1	OCLN	MIR33A
CLDN4	CXCL12	ACTA2	AR	HMGCR	MMP13
COL3A1	CXCR4	ACTBL2	ATP2A2	NDRG1	MOAP1
ERBB3	CYP3A11	ACTG1	ATXN1	HSPA1L	MPO
FN1	DCX	ACTL6A	BAD	ALDH1B1	MRPL33
HAMP	DFFB	ACTN1	BCHE	ACADL	MX1
HSF1	DNM1L	ACTN4	C3	ELK1	MYCBP2
IKBKB	DNMT3A	ACTR10	CASP6	YAP1	MYD88
IQGAP1	DNMT3B	ACTR1A	CCNE1	ABCB4	NCOA1
MIR34A	FASN	ACTR1B	CCS	LAMB1	NCOA2
NR1H3	FDPS	ACTR2	CD40LG	CYB5R3	ND1
OLR1	GATA2	ACTR3	CDH2	TJP1	NDUFS1
PTGES	GSDMD	ACTR6	CFLAR	POSTN	NF1
SESN2	HDAC4	ACY1	CHAT	ACTB	NFIA
SMO	HGF	ACYP1	CHEK1	MIR10B	NFKB1
SOCS3	IL5	ADAD2	CLDN5	ITGAM	NR3C1
SP3	INS1	ADAM10	CNC	MT1	NRG1
TFF1	IRAK1	ADAM9	CNTF	NQO2	NSMCE2
TLR2	IRS1	ADAR	CTSK	CDKN1B	NUP37
TNFRSF1A	ITGAM	ADCY7	CXCL12	FN1	PABPC1
TXNIP	LCN2	ADD1	CYP11A1	TOP1	PCDH18
VDR	LPL	ADD2	CYP11B1	EIF4EBP1	PCK1
XIAP	LTA	ADD3	CYP11B2	SREBF1	PDCD10
ACE	MAP3K1	ADH5	DNMT3B	MYH6	PDCD5
ADIPOQ	MAPK10	ADI1	EGR1	GEM	PDLIM5
AQP5	MAPK14	ADK	ESR1	IFNB1	PEAK1
ATF6	MFN1	ADM	ETS1	ATM	PER2
ATM	MKI67	ADNP	FLT1	KDR	PIGA
BAK1	MMP14	ADPGK	FOSL1	GADD45A	PLCE1
BMP6	MMP7	ADPRHL2	G6PD	INTS3	PLOD3
CASP6	MYD88	ADRM1	GDF1	PRKCA	PLS1
CCNA2	ODC1	ADSL	GLB1	PTK2B	POLE2
CCND2	OPA1	ADSS1.L	GNAI2	ITGAV	PPP2R3A
CYP2C9	PINK1	ADSS1.S	GSDMD	HSP90AA1	PRICKLE2
EIF2S1	POLB	ADSS2	GSTA1	PRPSAP2	PRKCD
ELK1	PRKCE	ADTRP.S	HSPA1A	TARDBP	PRKCSH
EPO	PRKDC	AFAP1	IL13	CTSD	PTK2
ERN1	RTKN	AFDN	IL5	HNRNPA1	RAB1C
F3	SNCA	AFG3L2	IRF1	CLNS1A	RAB33B
FADD	SQSTM1	AG1.S	ITGA2	GPX1	RARA
GADD45A	SREBF1	AGFG1	ITGAM	GCLM	RB1
HSD17B3	SREBF2	AGK	JAG1	ACACB	RBX1
HSD3B1	STAT1	AGL	KEAP1	ERGIC3	RGL1
HSPA1B	STAT5A	AGO1	LDHA	AHCY	RIDA
INSR	SULF1	AGO2	MAP2K4	ZMPSTE24	RNASE1
JAK1	TFRC	AGPAT5	MGMT	HK1	RNF213
KITLG	TLR2	AGPS	MMP13	CAMK2A	RPL13
LYN	TNFRSF10A	AGR2	MSH2	NFATC1	RPL27A
MAOA	TNFRSF1A	AGRN	MSH6	RGS18	RPL37A
MAP1LC3B	TNFSF11	AGTRAP	NFKBIB	HNF1BB	RPTOR
MAP2K4	TOP2B	AHCTF1	NR3C2	SUR-7	SAMD9L
MAPK14	TYMP	AHCY	PCNA	PER3	SCD
MYD88	VIM	AHCYL1	PDK1	CYP1A1	SFRP1
NOTCH1	XBP1	AHCYL2	PINK1	COG1	SH3PXD2B
NT5E	A4GALT	AHNAK	PLA2G4A	ABCC4	SIDT2
PIK3R1	ABCG1	AHNAK2	PPP1R15A	LAMC2	SIPA1L1
PRDX2	ACLY	AHSA1	PRKAA2	ANGPTL6	SIRT1
PRDX5	ACO2	AIDA	PRL2C2	APOA1	SIRT3
PRL	ADORA2A	AIFM1	S100A11	U2AF2	SKN-1
PTGS1	AGER	AIMP1	SELE	ERCC1	SLC10A1
SCNN1A	AKAP6	AIMP2	SIRT3	PDIA6	SLC10A2
SELP	AQP3	AIP	SLC1A1	SLC18A2	SLC25A2
SERPIND1	ATF4	AK1	SLC25A20	CAPN1	SLC2A1
SLC22A2	ATF6	AK1.L	SMAD2	LRP1	SLC39A14
SLC2A9	AXIN1	AK2	TFAM	TPM4	SLPI
SLCO2B1	BCL2A1	AK3	TH	GOLGA3	SLX9
SNAI1	BCL2L11	AK4	TNFRSF10A	RNY5	SMAD3
SQSTM1	BCL2L2	AK5	TSLP	EGR1	SMN2
SULT1A1	BCL3	AK6	A1BG	PLPBP	SMO
TBC1D4	BIRC7	AKAP12	ABCG4	MARCKS	SMUG1
TGM2	CAMK2A	AKR1A1	ACSM5	ARHGAP42A	SNHG32
TNFRSF10A	CASP12	AKR1B1	ADIPOR2	CDF-1	SNORA28
TP53I3	CASP3A	AKR1C1	AKR1C3	CYP8B1	SNORA60
UGT1A10	CCAR1	AKR1C2	APAF1	MMP1	SNORD15A
AFP	CCNA2	AKR1C2.S	APEX1	PRL	SNORD21
AHRR	CCND3	AKR1C3	APEX2	VIPR2	SNORD44
ALOX5	CD14	AKR1D1	ATP1A1	RAB7A	SNORD49A
ALPL	CDKN2A	AKR7A2	ATP6V0D1	PRKN	SNORD49B
AQP1	CDX2	AKT1S1	ATRN	SLC7A11	SNORD50A
AQP2	CKB	ALAS2.L	B2M	CCNB1	SNORD51
AQP7	CKM	ALCAM	BBC3	PINK1	SNORD55
ARHGDIB	CREBBP	ALDH16A1	BDNF	SFN	SNORD58A
ARNT	CSF1R	ALDH18A1	BGLAP	PRLR	SNORD74
ATF4	CTSB	ALDH1B1	BSK	GATA4	SNORD75
ATP6	CYP24A1	ALDH1L2	CASP10	MIR29C	SNORD78
AXIN2	CYP2B1	ALDH2	CCNA2	TFRC	SNORD79
CBR1	CYP2C19	ALDH3A2	CDH5	MBOAT7	SNORD82
CDC25C	CYP2C29	ALDH4A1	CDK1	NOB1	SNORD83B
CDK4	DDIT4L	ALDH6A1	CEBPB	PRDX6	SQLE
CDKN2B	DHCR24	ALDH7A1.L	CEBPE	RNY3	SREBF2
CFLAR	DHCR7	ALDH9A1	CED-3	RPL35	SRGAP1
CKB	DUSP1	ALDOA	CED-4	ACTA1	STAT1
CLDN1	DUSP10	ALDOC	CED-9	VPS45	SYNE2
COMT	DYRK2	ALG1	CFTR	AANAT2	TANC2
CTSD	EPX	ALG11	CHRM2	UCHL1	TCAF2
DHRS11	ERN1	ALG2	CKB	FTL	TEFM
EPAS1	F3	ALG3	CKM	FBXO32	TEX30
EPHX2	FADS1	ALG5	COL18A1	PGD	TLR2
FOXO1	FADS2	ALG6	COLQ	KIF20A	TLR9
GPER1	FANCD2	ALG8	COX1	DEF6	TMEM60
GPX3	FANCI	ALKBH7	CREB1	PDCD4	TNFSF10
GSTA5	FGF2	ALP2	CRYGA	CAMSAP2	TRAF6
H2AX	FLT1	ALYREF	CS	FKBP3	TRERF1
HMGCR	FOSL2	AMPD2	CSF3R	MTMR6	TRPV1
HSD17B1	FOXA1	AMPH	CTSB	GAK	TULP4
HSP90AB1	FOXO1	AMY2A.L	CUX2	AQP1	TXNRD1
IGFBP3	FUS	ANAPC1	CXCL6	SCFD2	UQCRC2
IL1R1	G6PD	ANAPC15	CYBB	ATF2	UTRN
INSL3	GATA4	ANAPC2	CYP17A1	MFF	VPS13D
ITGB3	GGT1	ANGPTL6	CYP1B1	IGSF11	WDFY3
KRAS	GLI2	ANGPTL7.L	CYP2B1	ARID3A	WNT5A
LCT	GOT1	ANGPTL7.S	CYP2B6	ARPC5L	XDH
LDHA	GRIN2A	ANK2	CYP4A1	G6PD	XRCC1
LYZ	GSS	ANKEF1	CYTB	SCHIP1	XRCC3
MGL2	GSTO1	ANKFY1	DEFB49	CSF2	XRCC4
MT2A	H3F4	ANKHD1	DIO3	ATP1A1	YAE1
ND2	HAND1	ANKLE2	DLG4	LARP4B	ZFAND6
NR3C1	HAND2	ANKMY2	DUSP1	SIN3A	ZFP36L2
PCK1	HSF1	ANKRD17	EGL-1	ART3	ZMYM2
PDGFB	HSP90B1	ANKRD2	EGL-9	SLC30A2	ZNF804A
PIK3CA	HSPA4	ANKRD20A8P	EIF4E	CXCL5	AAMDC
PLAUR	HSPB1	ANKRD26	ENDOG	IL12RB2	AAR2
POR	HSPD1	ANKRD28	EPAS1	LPL	AASDH
PPP3CA	IFNAR1	ANKRD37.L	FGF2	COL4A1	ABCB10
PRDX3	IFNAR2	ANKRD52	FMO-2	SCCPDH	ABCC10
PRKCB	IGF2	ANKRD54	FOXO1	TSC22D1	ABCC2
PTGR1	IGFBP4	ANKRD9	FTH1	DAP3	ABCC4
RASGRP3	IGFBP5	ANKS1B	FXN	PTEN	ABCC5
SFN	IL12B	ANKUB1	FYN	BRD8	ABCD3
SLC22A12	IL1A	ANKZF1	GAPDH	ENO2	ABCE1
SLC22A5	IRF3	ANLN	GATA1	RBM15	ABHD6
SLC2A1	ITGB1	ANP32A	GCH1	EHHADH	ABL2
SLC2A2	JAK3	ANP32B	GDNF	ATP2C1	ABR
SLC40A1	KIT	ANP32E	GFAP	GATAD2A	ACACA
SLC5A5	KMT5A	ANPEP	GLRX	PTGES2	ACADM
SLCO1A2	LAMP1	ANXA1	GNAI3	ALPI	ACADSB
SQSTM	LCAT	ANXA11	GPC5	CKB	ACAP2
SULT2A1	LEF1	ANXA13.L	GPR55	S100A4	ACAT2
TCF4	LIG3	ANXA2	GSTA5	ITPR1	ACLY
THBS1	LIG4	ANXA3	GSTE1	ME2	ACOT13
TIMP2	LRP5	ANXA4	HERPUD1	NPPC	ACSL1
TRIM63	LRP6	ANXA5	HMBS	SEMA4B	ACSS2
TRPM7	LSS	ANXA6	HMGB1	SNU13	ACTB
UCP2	LTB	ANXA7	HPX	MAP2K2	ACTBL2
UGT1A3	MMP1	AP1B1	HRAS	MYEF2	ACTR10
UGT1A6	MS4A1	AP1G1	HSD17B3	NDC1	ADAM19
ABCC5	MSMO1	AP1G2	HSPD1	WDR26	ADAM20
ABCG5	MSR1	AP1M1	IDH2	APEX1	ADAMTS12
ACLY	MT1A	AP1S1	IER3	CSNK2B	ADAMTS4
ACTB	MT2A	AP2A1	IGFBP1	PFKFB2	ADAMTSL4-AS1
AKR7A3	MVK	AP2A2	IKBKB	RGS19	ADARB1
AKT2	MXD3	AP2B1	IL17A	EIF4G3	ADAT1
ALPI	NEIL1	AP2M1	IL2RA	CELSR3	ADGRE1
ANGPT1	NES	AP2S1	INSR	ACER2	ADM
ANXA1	NEUROD1	AP3B1	ITGA2B	ATP6V1C1	ADRA1B
AQP3	NEUROG1	AP3D1	ITGB3	ETF1	ADRB2
BCL2L11	NOD2	AP3M1	JUNB	CSF1	ADSS
BHMT	NOS1	AP3S1	KCNQ5	MCM2	ADSS2
BNIP3	NPPA	AP4S1	KDM2A	PSMD3	AFG1L
BRCA2	NR1I2	AP5Z1	MAP2	UPF1	AGAP1
BUB1	NR3C1	APAF1	MAP2K1	BAZ1B	AGER
BUB1B	OGG1	APBB1IP	MAP2K2	OAS1	AGL
CCL3	PAX6	APEH	MAP2K3	YPEL1	AGPS
CD74	PCK1	APEX1	MAP2K6	COX8A	AGTR1
CDC6	PORCN	API5	MAPK10	DHCR7	AIDA
CFTR	PPARD	APIP	MAPK8IP1	FGF1	AIFM1
CHEK1	PRKCA	APLP2	MAPT	EHD3	AIMP1
COX1	PRKN	APMAP	ME1	PLA2G4A	AJUBA
CSN1S1	PTCH1	APOB	METTL14	ABCF2	AKAP9
CSNK2A1	PTGES	APOBEC2.L	MFN2	EPN2	AKIP1
CTSB	RAF1	APOBEC3B	MIR21	GLG1	AKIRIN2
CX3CR1	RELN	APOBEC3C	MKI67	INTS6	AKR1C1
CXCR4	SCD	APOE	MLH1	BID	AKR1C2
CYBA	SCD1	APOL2	MMP7	IRF4	AKR1C3
CYBB	SFRP2	APOO	MRC1	ATG5	AKT3
CYP17A1	SHH	APP	MSTN	SLC2A2	AKTIP
CYP24A1	SIM2	APPL1	MT1	GCNT1	ALDH3A2
CYP2B10	SIRT1	APPL2	MT2	GRIN2B	ALDOA
CYP2D6	SLC2A2	APRT	MUC5B	LAT2	ALDOC
CYP3A5	SLC3A2	AQR	MX1	AURKB	ALG14
CYP51A1	SLC7A11	ARAP1	MYCBPAP	EGF	ALG6
DCT	SMAD3	ARCN1	MYOG	PKIA	ALG8
DEFA1	SMAD4	ARF1	NCF2	DDX6	ALPK2
DEFA2	SMN2	ARF4	NCF4	KRT16	AMH
DFFA	SMO	ARF5	ND2	TPP2	AMMECR1
DIABLO	SOCS3	ARF6	ND5	RAB1A	AMPD1
DSPP	SOX2	ARFGAP1	NDUFB6	CTSA	ANAPC4
EDNRB	SP1	ARFGAP2	NFATC1	SESN2	ANAPC7
EGLN1	SQLE	ARFGAP3	NFE2	CNBP	ANKIB1
EIF2AK3	STAT4	ARFGEF1	NPFF	EHD1	ANKMY2
EIF4EBP3	STAT5B	ARFGEF2	NPM1	AHSA1	ANKRD10
ENDOG	TCF7L2	ARFIP1	NR1I3	AP1G1	ANKRD26
EPHX1	TFAM	ARG2.L	NRF1	EDNRB	ANKRD36
ERP29	TIMP2	ARHGAP1	NTRK1	EIF4G2	ANKRD44
FABP1	TJP1	ARHGAP12	NUPR1	IMPA1	ANO1
FDFT1	TNFRSF1B	ARHGAP17	OLR1147	SLC12A5	ANO4
FMO5	TRAF6	ARHGAP18	OPA1	ABCC1	ANO6
FOSL1	TUBB3	ARHGAP29	OPTN	NR4A2	ANXA11
FOXA1	UGT1A	ARHGAP35	OTC	ANO1	ANXA4
FTL1	VWF	ARHGAP4	P2RX2	MICAL1	AOPEP
GADD45B	WIF1	ARHGDIA	PCMT1	NUP153	AP1S3
GAPDH	WNT1	ARHGEF1	PDCD4	PDGFRB	AP2A2
GATA1	XAF1	ARHGEF10	PDHA1	KIF1A	AP5S1
GDF15	XRCC1	ARHGEF12	PDIA2	RNY4	APAF1
GLI2	XRCC4	ARHGEF16	PEX11A	TRPV2	APBB2
GLRA1	YWHAE	ARHGEF2	PLAU	LUC7L	APH1B
GSTA2	AARS1	ARHGEF26	PML	PPP2R1B	APOL2
GSTA3	AATF	ARHGEF28	PON2	RBMX	APP
GSTM1	ABL	ARHGEF34P	POU5F1	WNK1	APPL2
GSTP2	ACE	ARIH1	PPP2CA	PTK2	AQP3
HAT1	ACE2	ARL1	PPP2R1B	PZP	AQR
HMGCS1	ACKR3	ARL2	PRDX1	FLT1	ARAP3
HNRNPA2B1	ADAM17	ARL2BP	PRDX3	TIMP3	ARCN1
HRAS	ADAMTS4	ARL3	PRKDC	TOMM40	ARFGEF1
HRH1	ADCY9	ARL4C	PRKG1	PDX1	ARHGAP10
HSPA8	ADGRE1	ARL6IP4	PRL7B1	AOC1	ARHGAP11A
HSPD1	AGR2	ARL6IP5	PRLR	GPX4	ARHGAP12
IDI1	AGTR2	ARL8A	PSAT1	SEC23B	ARHGAP18
IL2	AK1	ARL8B	RAB30	CASP1	ARHGAP20
KRT8	AKR1B8	ARMC1	RAC1	TRP53	ARHGAP21
LCAT	ALAS1	ARMC10	RAF1	ANXA2	ARHGAP24
LEF1	ALCAM	ARMC8	REL	CALR	ARHGAP28
LEPR	ALDOA	ARMC9	RELB	NQO1	ARHGAP29
LMNB1	ALDOC	ARMCX3	RL	AKT1S1	ARHGAP42
MAP3K5	AMPD3	ARMT1	RTP1	CHUK	ARHGEF26
MCP1	ANKRD37	ARPC1A	RUNX2	CSNK1D	ARHGEF28
MIR148A	ANKRD50	ARPC1B	SERPINH1	FOXO4	ARHGEF3
MITF	ANKZF1	ARPC2	SKP2	KRT8	ARL15
MMP7	AOC1	ARPC3	SLC14A2	MPO	ARMC1
MSH2	APC	ARPC4-TTLL3	SLC22A4	PEA15	ARMC9
MTTP	APOE	ARPC5	SLC22A5	COLEC12	ARPC5L
NANOG	ARHGAP24	ARPC5L	SLC2A1	CDK2	ARRB1
NCAPG	ARHGAP30	ARPIN-AP3S2	SLC2A3	DNM2	ARRDC3
NES	ARHGDIB	ARPP19	SLC7A11	MTF1	ARSI
NKX3-1	ATF1	ARRB2	SMC1A	PRKCB	ARSJ
NPPB	ATF2	ARRDC3B	SPI1	AGXT	ART4
NQO2	ATR	ARSL	SPP1	COX6A2	ARV1
NR0B2	AURKA	AS3MT	SYN1	MLEC	ASAP1
NR5A1	AURKB	ASAH1	SYP	TGM2	ASAP2
NRAS	B3GALT6	ASB9	TFE3	MTNB	ASB6
NRF1	BCL10	ASCC1	TGM1	NOTCH1	ASCC3
NTRK1	BCL2B	ASCC2	TGM2	PPM1A	ASF1A
ODC1	BCOR	ASCC3	TIMP2	PTPRN	ASH2L
PDPK1	BECN1	ASCL1.L	TLR2	SPAG9	ASPM
PECAM1	BGN	ASF1A	TNFAIP6	RNY1	ATAD2B
PGK1	BMP2	ASF1B	TNFRSF1A	GNG2	ATE1
PHKA2	BSG	ASL	TNFSF4	GPX2	ATF3
PKM	C1QA	ASMTL	TOR3A	PDP1	ATF4
PLD1	C1QB	ASNS	TP63	ID1	ATG10
PON2	C3	ASPDH	TRIB3	LONP1	ATG4A
PPARGC1B	C4B	ASPH	TRPA1	CYP3A11	ATG4C
PRDX1	CAPG	ASS1.S	TYR	SPTLC2	ATG4D
PTBP2	CAR9	ATAD1	UGT1A6	TRPV6	ATG5
PTCH1	CASP2	ATAD2	ULK1	WIPF1	ATL1
RELB	CASP4	ATAD3A	VCP	ADM	ATN1
ROCK1	CCDC116	ATAD3B	VMO1	APOB	ATP10D
SDHC	CCL3	ATE1	WTAP	MIR155	ATP1B1
SHBG	CCPG1	ATF5.2.S	YWHAH	MIR34A	ATP2A2
SLCO1B1	CCR2	ATG3	YY1	ARL4C	ATP2B1
SQLE	CD40LG	ATG5	ABCA5	MRPS6	ATP5MGL
SYK	CD44	ATG7	ABCC3	STK39	ATP6V0C
TAGLN	CD47	ATG9A	ABCC4	SYN2	ATP7B
TERT	CD55	ATIC	ABCG1	TXN	ATP8B1
TFAM	CDC14B	ATL1	ABL1	SYT1	ATR
TH	CDC20	ATL2	ACOT5	DRD4	ATXN2
TNFRSF10D	CDC25C	ATL3	ACP3	E2F1	ATXN2L
TP63	CDH11	ATOX1	ACSS1	MMP13	ATXN3
TSFM	CDH17	ATP11A	ADAM33	TESTIN	AURKA
TUBB	CDK5	ATP12A	ADGRB2	BAIAP2	AXUD1
TYMS	CDK6	ATP12A.S	ADGRB3	EIF3C	AZIN1
TYRP1	CDK7	ATP13A1	ADH1	IL4R	B3GLCT
UCP1	CDK9	ATP1A1	ADK	MT1H	B3GNTL1
UGT1A7	CDKN2D	ATP1A2	AGTR1	RPS20	BAAT
UGT1A9	CEBPB	ATP1A3	AIMP1	SOS1	BACE1
VHL	CES1	ATP1B1	AKR1B8	APRT	BAG1
XPC	CES3	ATP1B2	ALAD	ATF3	BAG2
ABCB11	CHAT	ATP1B3	ALDH2	HSP70	BAG3
ABCC2	CHIL3	ATP2A2	ALK	TLR7	BAG4
ABCD2	CHRM2	ATP2B1	ALKBH5	IER3	BAG6
ACADM	CLCA4A	ATP2C1	AMACR	SPP1	BAK1
ACAT2	CLCN6	ATP5F1A	ANG	CCNB2	BAZ1A
ACBD6	CLDN2	ATP5F1B	ANGPT1	HBEGF	BAZ2B
ACOX2	COL1A2	ATP5F1C	ANGPTL4	TOMM20	BBS10
ADGRE1	COL27A1	ATP5F1D	ANKRD29	TRPV1	BBS2
ADGRG1	COL3A1	ATP5F1EP2	AOC1	LAMA4	BBS4
AGTR1A	COL4A2	ATP5IF1	APH1B	GSDME	BBX
AGXT	COL4A5	ATP5J	AQP2	GSTM3	BCHE
AIF1	COL5A1	ATP5ME	ARL13A	S100G	BCL6
AK4	COL5A2	ATP5MF	ARNT	CYP3A5	BCL7A
AKR1B10	CPT1A	ATP5MG	ARRDC3	SLC3A2	BDKRB1
AKR1B8	CREB3	ATP5MK	ART4	VMP1	BICD2
AKR1C3	CS	ATP5PB	ASNS	C9ORF78	BIN3
ALDH1B1	CSF1	ATP5PD	ASTL	CALM3	BIRC3
ALDH2	CSF2RA	ATP5PO	ATF3	NOX4	BLID
ALDH4A1	CSF2RB	ATP6	ATG10	UBE2H	BLVRA
ALDOA	CSK	ATP6AP1.1.S	ATG14	SLC15A1	BMP2K
ALOX12	CSPRS	ATP6V0A1	ATG16	CLCN3	BMP4
ANKH	CTLA2A	ATP6V0A4.L	ATG16L1	NR0B2	BMPER
ANXA2	CTSS	ATP6V0C	ATG4A	PIK3C3	BMPR1A
AOC3	CXCL14	ATP6V0D1	ATP6	CYLD	BMX
AP5M1	CXCR1	ATP6V0D2.L	ATP8	INS	BOLA1
APC	CXCR2	ATP6V1A	ATR	SYNM	BORA
APOF	CYM	ATP6V1AL.L	AURKB	CCT7	BPGM
APOM	CYP2B10	ATP6V1B2	AXIN2	MYD88	BPNT2
AQP9	CYP2B9	ATP6V1C1	B3GALT5	TLR6	BRCA2
ARG1	CYP2C9	ATP6V1D	B3GNT9	RPS7	BRD1
ATF1	CYP2D6	ATP6V1E1	BACH1	DICER1	BRIP1
ATF3	CYP4A3	ATP6V1F	BAG3	STX3	BRPF3
ATG12	CYTH4	ATP6V1G1	BARX2	UCP3	BRWD3
ATG7	DAXX	ATP6V1G3.L	BAXA	ACADSB	BTBD8
ATP1B1	DBN1	ATP6V1H	BCAS1	CDK6	BTF3
ATP6V1C1	DCN	ATP8A1	BCL2L11	PDK4	BTF3L4
ATP7B	DHRS1	ATRX	BCL6	TLN1	BTN3A1
ATXN3	DLG4	ATXN10	BDKRB1	RPS6	BTN3A2
AUH	DNAJB9	ATXN2	BIK	IL3	BTN3A3
BCHE	DNMT2	ATXN2L	BIRC2	MTB	BTRC
BDH2	DRAM1	ATXN7L3B	BIRC3	MTNA	BUB1
BHLHE40	DRD2	AURKB	BMAL1	PPARGC1A	BUD31
BLM	DUSP5	AVL9	BMP15	RGS1	C14ORF119
BRCA1	DYNLL1	AZIN2.S	BMP5	USP7	C15ORF39
BUB3	E2F1	B2M	BMP7	CSNK1A1	C15ORF48
CADM1	E2F5	B2M.S	BNIP3	PPP2R1A	C1GALT1
CADPS2	ECH1	B3GALT6	BPGM	PFKL	C1ORF112
CALCR	EDARADD	B3GAT3	BTG1	COX17	C1ORF162
CAPN1	EDIL3	B3GNT7.S	C5	IRF3	C1ORF21
CAPN2	EIF1	B4GALT1	CACNA1G	TPD52	C1ORF52
CASP4	EIF4G1	B4GALT4	CAPN1	ALDH2	C2CD2L
CCL8	ELF2	BABAM1	CAPN2	BTG2	C2CD3
CCNA1	EMB	BABAM2	CASP14	JAK2	C2CD5
CCNB2	ENO1	BAG2	CBS	SCARB1	C6ORF47
CCND3	ENTPD5	BAG6	CCL17	TIMP1	C9ORF131
CCNE2	EPAS1	BAIAP2	CCL18	UBE2I	C9ORF24
CD302	EPO	BAIAP2L1	CCL20	PABPC1	CACNB1
CD40LG	ETS2	BAK1	CCL22	PSMA1	CAMK2D
CD63	F2R	BANF1	CCL24	PSMA4	CAMKMT
CD68	FADD	BAZ1B	CCL8	SCN5A	CAMLG
CD69	FAM120B	BBC3	CCN2	ADH5	CAND1
CD80	FAS	BCAM	CCNA1	CCN1	CAPN2
CD86	FBLN2	BCAP31	CCND3	DDX3X	CAPRIN2
CDC20	FCGR3A	BCAS2	CCNE2	CXADR	CARMIL1
CDC45	FDFT1	BCAT2	CD14	PFKM	CARNMT1
CDC7	FGF5	BCCIP	CDC25C	TIA1	CASC3
CDK6	FGFR2	BCKDHA	CDH11	TPT1	CASD1
CDK7	FILIP1L	BCKDHB	CDH13	EEF1G	CASP1
CDKN1C	FIS1	BCKDK	CDK4	P4HA2	CASP6
CDKN2C	FNTB	BCL10	CDK7	PRKCD	CAV2
CDKN3	FOXA2	BCL2L10	CEBPA	SERPINA3	CAVIN2
CENPF	FOXF2	BCL7B	CEBPD	SPON1	CAVIN4
CEP152	FPR3	BCLAF1	CFH	ZFP617	CBLL1
CERS5	FSHB	BCS1L.L	CHKA	MTHFD1	CBX4
CFAP298	FSTL1	BDH1	CHRM3	CD14	CBY1
CFB	FTL1	BDH2	CHRM4	CNN3	CC2D1B
CHAT	FZD1	BDNF.S	CHST1	PPM1D	CC2D2A
CHD2	G6PC	BET1	CHUK	C3	CCDC103
CHEK2	G6PDX	BET1L	CISH	IRS1	CCDC125
CHKA	GABRA1	BICD2	CLEC9A	NR1I2	CCDC126
CLDN10	GAD1	BID	CLK1	CDK1	CCDC138
CNN1	GAS6	BIN1	CMA1	CHIL4	CCDC18
COL6A1	GDA	BIRC2.L	COL1A2	GPC1	CCDC62
COQ3	GGTA1	BIRC6	COL4A1	INCENP	CCDC71
COX7B2	GJA1	BLMH	COMT	NPHS1	CCDC77
CP	GLO1	BLOC1S2	CP	SNCA	CCDC86
CPT1B	GOT1L1	BLVRA	CPE	PDLIM7	CCHCR1
CRYZ	GPER1	BLVRB	CPLX1	GSTA4	CCL3
CRYZL1	GPHN	BMP2K	CPT1A	MIR216B	CCN2
CS	GPX1A	BMS1	CPT1B	PDK2	CCNB1
CSNK2A2	GRB10	BNIP3	CRADD	ERN1	CCNB1IP1
CSTF2	GRB2	BOLA2	CRAT	PRMT1	CCNF
CTH	GREM1	BOP1	CREM	RAD23B	CCNG2
CTSK	GRIA4	BPNT1	CRP	TRAF2	CCNL1
CUL4B	GRM2	BPNT2	CRY1	EIF4B	CCNT2
CXCL1	GSK3A	BRAT1	CRYAB	PRDM1	CCNY
CYCB	GSN	BRCC3	CSF1	IL1RN	CCSER2
CYP2C19	GSTA2	BRD2	CTRC	RPS19	CCT6A
CYP2J2	GSTA4	BRD4	CTRL	EGLN1	CCT8
DBF4	GSTA5	BRD8	CXCL14	LMO7	CD14
DDIT4	GSTK1	BRI3BP	CYBA	PPP1R10	CD2AP
DENR	GUSB	BRIX1	CYCT	ADRB2	CD44
DERL3	H1-10	BRK1	CYP24A1	CYCS	CD58
DHCR7	H19	BROX	CYP26C1	DEPTOR	CD9
DIO1	H2BC26	BSG	CYP2A5	BCL2L11	CDC25A
DKK1	H2BC5	BTF3	CYP2B31	EEF2K	CDC25C
DKK2	H4C11	BTF3L4	CYP2C19	NFKBIE	CDC27
DLGAP5	H4C15	BUB3	CYP2C9	PPIF	CDC42
DMPK	HAMP	BUD31	CYP2D6	RRBP1	CDC42EP3
DMXL1	HBS1L	BYSL	CYP3A23-3A1	MT1G	CDC42SE2
DPP4	HDAC11	BZW1	CYP3A5	ACTC1	CDC73
DTWD1	HDAC3	BZW2	CYP4A11	MET	CDCA3
DUOX2	HDAC6	C10ORF90	DAPK1	ALPL	CDH13
DUSP1	HDAC7	C11ORF54	DDHD1	FTH1	CDIN1
E2F1	HDAC8	C11ORF58	DDIT4	KNL1	CDK4
E2F2	HEBP2	C11ORF98	DEFB12	SLC27A1	CDK5R1
E2F5	HES1	C12ORF57	DEFB18	ACE	CDK5RAP2
EGR2	HIST1H2BQ	C17ORF49	DEFB4A	NLRP3	CDKL5
EHHADH	HLA-DPB2	C18ORF25	DHH	EIF2AK3	CDKN1B
EIF2A	HMGCS1	C19ORF33	DKK1	ELN	CDKN2AIP
EIF4E	HNRNPA1	C1GALT1	DMRT1	FLNC	CDON
EIF4EBP1	HNRNPD	C1ORF35	DNAH3	PMAIP1	CEBPA
ELAVL3	HOPX	C1ORF56	DNAI1	VCAM1	CEBPD
EMP1	HOXB5	C1ORF94	DNAJB1	GRB2	CELP
EMP3	HPRT1	C1QBP	DNAJB4	HDAC6	CEMIP2
ENO1	HSP90AA1	C20ORF27	DNAJB9	IER5	CENPA
ENPP3	HSP90AB1	C2ORF49	DSG1B	MBNL2	CENPE
ERCC1	HSPB7	C2ORF80	DSP	NASP	CENPI
EVA1A	HTR1A	C3	DSPP	AIFM1	CENPP
F2RL1	ID1	C4A.L	DUSP4	RIGI	CEP112
FAIM	ID2	C4B	DUT	CP	CEP128
FAM50A	ID3	C5	E2F1	FGF7	CEP170
FBXO32	IDO1	C6.1.L	EFCAB3	HBP1	CEP290
FDPS	IFNK	C6ORF120	EFNA1	EIF4A1	CEP41
FDX1	IGFBP1	C7ORF50	EFNB2	ITGA3	CEP70
FGF18	IGFBP2	C8A.L	EGR2	LIPE	CEP83
FOXO3	IGFBP7	C8ORF33	EI24	MIR101B	CEPT1
GAB1	IGLL1	C9.L	EIF1AX	MYOF	CETN3
GABPA	IKBKG	C9ORF64	EMILIN2	CSNK2A1	CFB
GJA1	IL12A	C9ORF78	ENPP2	C4B	CFLAR
GLDC	IL17A	CA2	ENPP7	IGF1R	CHAC1
GLIPR1	IL2RA	CA6.L	ENTREP1	PA2G4	CHD6
GLS	INSIG2	CAB39	EP300	PTMA	CHD7
GLUL	INSR	CACYBP	EPB41	SCARB2	CHD9
GPAM	IRAG2	CAD	EPHB1	EFNB2	CHMP6
GPAT3	IRAK2	CADM4	EPS8	RYR1	CHST11
GPI	IRF5	CADPS	ERBB2	TRAPPC2B	CHST15
GPR137B	IRS2	CALB1	ERCC1	PSMC4	CIART
GPR35	ITGA2B	CALD1	ERCC8	RPS6KA3	CISD1
GPR83	ITGB3	CALM3	ESR2	SRSF5	CIZ1
GPX5	ITM2A	CALR	ESRRA	WT1	CKAP4
GRB14	ITPR1	CALU	F13A1	KLF15	CKAP5
GRB2	JAK1	CAMK1	F3	TWIST1	CKS2
GSDMD	JAK2	CAMK2A	FABP4	CDCA5	CLASP1
GSTA4	JSRP1	CAMK2B	FADD	PF4	CLDN7
GSTK1	JUND	CAMK2D	FADS2	PSMC5	CLK1
GSTM5	KCNH2	CAMK2G	FAM114A1	ALOX15	CLK3
GSTT1	KCNMB2	CAMKV	FAM114A2	PROCR	CLMN
GSTT3	KEAP1B	CAMSAP2	FAM13A	MT1E	CLMP
GSTZ1	KLF10	CAND1	FAM186A	SEMA3C	CLP1
H2AC8	KLF6	CANX	FAR1	IL15	CLPB
H3-4	KLHL21	CAP1	FBXO32	SORT1	CLTCL1
HBEGF	KLHL24	CAPG	FEN1	ZBTB20	CMAS
HBP1	KLK2	CAPN1	FER1L5	APOC3	CMIP
HDC	KRTAP2-1	CAPN2	FGF12	LCK	CMPK2
HES1	KYNU	CAPN9.L	FGF6	L1CAM	CNKSR2
HEXB	LBP	CAPNS1	FGF7	NOL3	CNKSR3
HHEX	LCP1	CAPRIN1	FHIT	PCK1	CNNM1
HK2	LCP2	CAPZA1	FILIP1L	SNAP25	CNOT11
HLA-DMA	LGMN	CAPZA2	FKBP5	F3	CNOT6L
HLA-DQA1	LHB	CAPZB	FLG	RAC2	CNTLN
HMBS	LHX5	CARD19	FLNA	SLC5A1	CNTRL
HMGB2	LILRB3	CARHSP1	FLT3LG	ASNS	COA3
HMGCS2	LIPC	CARM1	FMR1	CA14	COG2
HMGN3	LOX	CARMIL1	FOSB	GPR6	COG6
HNRNPA1	LPAR1	CARS1	FOSL2	NEFM	COG7
HSD3B6	LRRN3	CARS2	FOXD2	HSPD1	COL2A1
HSF4	LTBR	CARTPT.L	FOXD4	HYOU1	COL4A1
HSP70	LYZ	CASK	FOXM1	MIR433	COL6A1
HSP90B1	LYZ1	CASP6	FOXO3A	PAWR	COMT
HSPA2	LYZ2	CASP7	FOXP3	CACNA1C	COP1
HSPA4	MADCAM1	CASP8	FSHB	MXD1	COQ2
HSPA4L	MAOA	CAST	FTL1	NPPA	COQ5
HSPA6	MAP1LC3A	CAT.1.L	FTO	GNRH3	COQ6
ID2	MAP2K3	CAT1.L	FZR1	MIR154	COQ9
IDO1	MAP2K4	CAV1	G6PC1	RTN4	COTL1
IER3	MAPK12	CAVIN2	GALNTL5	CTTN	COX1
IFNGR1	MAPT	CBFB	GAP43	DCLK1	CPA3
IL12B	MCL1	CBL	GBP1	SMARCA4	CPE
IL1RL1	MCM2	CBR1	GDF15	TNFRSF10B	CPEB2
IL1RN	MCM7	CBR3	GJA1	ATP1A2	CPLANE1
IL5	MECP2	CBR4	GJA4	CD38	CPNE8
IL6ST	MEF2C	CBX3	GJB1	ACADVL	CPSF3
IMMT	MELTF	CBX5	GK	NPC1	CPTP
INHA	METTL7A	CC2D1A	GKN2	TSC2	CREB3L1
IP6K2	MFN2	CCAR1	GLCCI1	CXCL12	CREBBP
IRF3	MFNG	CCAR2	GLP1R	CYP4B1	CREBRF
ITGA5	MGST1	CCDC124	GLS	GUCA2A	CREBZF
ITGAV	MIF	CCDC158	GLUD1	EGR3	CROT
ITPR1	MIR1290	CCDC22	GP1BA	HRNR	CRTC2
JUNB	MIR146A	CCDC43	GP2	MIR497	CRY1
JUND	MIR19A	CCDC47	GPBAR1	MVP	CRY2
KDM3A	MIR21	CCDC50	GPR153	PNPLA2	CRYAB
KIF15	MIR22	CCDC6	GPR20	SULT1A1	CRYBB2
KIF23	MIR222	CCDC85C	GPX2	VRTN	CRYZL1
KLC4	MIR223	CCDC88A	GPX4	RRAD	CSE1L
KMT2A	MIR22HG	CCDC9	GRIA1	COX4I1	CSNK2A2
KRT1	MIR27A	CCL3	GRIA2	CYP2C29	CTIF
KRT19	MIR27B	CCN1	GRIN2B	REN1	CTNS
LGALS1	MIR30A	CCNA2	GRM2	ABCA1	CTPS
LGALS9	MIR34A	CCNB1	GRM3	PLAT	CTPS2
LGR5	MIR802	CCNB1.S	GRM5	C3ORF14	CTSB
LHCGR	MIR99A	CCNE1	GSTA2	MIR217	CWC25
LIF	MME	CCNH	GSTM2	CLIC4	CXCL10
LINGO1	MMP10	CCNY	GSTP1	HSPA8	CXCL2
LMNA	MMP13	CCR7	GULP1	ITPR3	CXXC5
LRMDA	MPHOSPH6	CCS	GYPA	KIFC1	CYB561D2
MAD1L1	MRPL1	CCT2	HAS2	OPA1	CYB5D1
MAFF	MRPL47	CCT4	HAX1	GAPDH	CYCS
MALT1	MSN	CCT5	HBEGF	CALD1	CYGB
MAOB	MT1	CCT6A	HECTD4	HMGA2	CYP1B1
MAP2K1	MVD	CCT6B	HGF	MYH9	CYP27B1
MAP2K6	MXD1	CCT7	HHIP	DRD2	CYP2A5
MAP3K4	MYH1	CCT8	HK2	STAT5	CYP2B10
MAP3K7	MYH6	CCZ1	HMGA2	NANOG	CYP2C29
MAPK10	MYL12A	CD109	HMGB2	DLG4	CYP2D22
MAPK13	MYL4	CD151	HMGCR	GATA6	CYP3A11
MAPT	MYLK	CD276	HNF4G	BCL2A1	CYP3A13
MAT1A	MYO18A	CD2AP	HSBP1	OGDH	CYP3A4
MBD4	NANOS1	CD2BP2	HSD11B2	DGAT1	CYP51A1
MCM4	NCAM1	CD36	HSD17B8	GLDC	CYREN
MGLL	NCOA1	CD44	HSD3B3	MAP3K1	CYRIB
MGST1	NEFM	CD47	HSF2	LUM	CYTH3
MIR125A	NFE2L1	CD59	HSPB1	FOXE3	DAAM1
MIR155	NFE2L2A	CD63	HTATIP2	KRT5	DAB2
MIR19B	NFKB2	CD70	ID2	NF1	DAPK3
MIR339	NFKBIB	CD74.L	IER5	ACSS2	DARS2
MKNK2	NFYA	CD81	IFIT2	VCP	DCBLD1
MMP10	NGF	CD9	IFRD1	CYP2F1	DCLK2
MSX1	NGFR	CD99	IGF1R	TGIF1	DCLRE1A
MT1	NHLRC2	CDC123	IGFBP2	TNFRSF17	DCUN1D4
MUC1	NKX2-5	CDC16	IGFBP4	WNT4	DDHD1
MYH1	NLRP12	CDC27	IL10RB	ULK1	DDX10
MYH3	NME1	CDC34	IL11B	LAMP2	DDX39A
MYL9	NMT2	CDC37	IL12A	MIR21	DENND2B
NAA15	NOD1	CDC42	IL15	DUSP10	DENND2C
NDC80	NOX4	CDC42BPB	IL16	PLG	DENND2D
NDUFS1	NPC2	CDC5L	IL17D	USP2	DENND3
NEB	NR1H3	CDC73	IL22	CIDEC	DENND4A
NFAT5	NR4A2	CDCA3	IL24	HSPA4L	DENND4C
NFATC1	NRF1	CDCA5	IL27	NME1	DENND6A
NFE2	NTN1	CDCP1	IL27RA	RPS6KB1	DENR
NFKBIB	NTRK2	CDIPT	IL3	FKBP4	DEPDC4
NGF	NUP98	CDK1	IL4R	GFAP	DEPDC7
NME4	OAT	CDK11B	INSIG1	RCAN1	DET1
NOS1	OLR1	CDK2	IREB2	RPSA	DGKD
NPPA	ORM1	CDK5	IRS1	FGF21	DHCR7
NR1I3	OSMR	CDK5RAP3	IRS2	ART1	DHX32
NR4A1	OTUD7B	CDK6	IRS3	AVP	DHX35
NRP1	PACRG	CDK7	ITGAV	PROM1	DHX57
OGG1	PAH	CDK9	ITGB1	XBP1	DIAPH3
OMA1	PAK2	CDKN2A	JAFRAC1	PML	DIMT1L
ORC2	PCSK9	CDKN2AIP	JAK1	STAT6	DIO2
OTC	PDIA3	CDS2	JUND	TRP63	DIP2A
PA2G4	PDPK1	CDV3	KA11	ACACA	DIP2B
PARK7	PDPN	CEBPB.L	KCNH5	HADHA	DIS3L
PDK2	PER2	CEBPD	KCTD4	PECAM1	DISP1
PDK4	PFKFB4	CEBPZ	KDR	ZEB2	DIXDC1
PFKFB3	PGD	CELF1	KIF2C	MIR195	DKK1
PFKP	PGF	CEMIP2	KITLG	TAP1	DLD
PFN1	PGS1	CENPV	KLK3	ATF5	DLEU2
PHGDH	PHB1	CEP131	KMT2A	LDLR	DLG1
PHLDA1	PHOX2	CEP170	KRAS	ENO3	DLGAP5
PHLDA2	PHYH	CEP43	KREMEN2	HEXB	DLK2
PIDD1	PIK3C2A	CEP97	KRT10	HSPB1	DLL4
PIK3CB	PIK3CA	CERS2	KRT18	MMP7	DMAP1
PIK3CG	PIR	CERT1	KRT6A	HBB	DMXL1
PKP2	PLA2G2A	CFAP36	KRT8	TOP2A	DMXL2
PLA2G2A	PLAUR	CFAP74	KRTAP21-2	TUBA4A	DNA2
PLAAT3	PLEKHH2	CFB.L	KRTAP4-13	ITGB4	DNAAF2
PLK1	PLK1	CFDP1	LAMB1	MITF	DNAJB4
PNKP	PLK2	CFH.L	LDHB	S100B	DNAJB5
PNPLA3	PLK3	CFL1	LGALSL	EIF4E	DNAJB9
POLB	PLK4	CFL2	LHX8	MIR382	DNAJC13
POLH	PLOD2	CGGBP1	LILRB3	MIR451A	DNAJC14
PPARD	PMAIP1	CHAC2	LINC-ROR	NRF1	DNAJC28
PPIA	PMEPA1	CHAMP1	LINE	ALX3	DNHD1
PPID	POLA2	CHCHD2	LIPE	PLPP3	DNM1
PPIL4	POLE	CHCHD3	LPIN1	TNNT2	DNM1L
PPM1D	POSTN	CHD1L	LPO	ANPEP	DNM3
PPP1R15A	PPDPF	CHD2	LRRK2	CALM1	DNMT3A
PPP3R1	PPIF	CHD3	LY9	APOE	DNPEP
PRDX6	PPP1CA	CHD4	LYPLAL1	HSPA1A	DNTTIP1
PRKAB1	PPP1R1B	CHERP	LYZL4	DCD	DNTTIP2
PRKACA	PPP2CA	CHID1	MADCAM1	IL23R	DOCK10
PRKAR2A	PPP3CC	CHIT1.S	MALAT1	MAT2A	DOCK11
PRKCI	PPP5C	CHM	MAP1LC3A	FOXB1	DOCK7
PRKCQ	PRDX2	CHMP2A	MAP1LC3B2	FUNDC1	DOCK9
PRKDC	PRDX3	CHMP4A	MAPK13	ITGA6	DOK1
PROM1	PRDX6	CHMP4B	MAPKAPK2	SPTBN1	DOP1B
PSD4	PRKAA1	CHMP4C	MAPKAPK3	ACOT1	DPH6
PSME4	PRKCH	CHMP5	MB	GSTA5	DPP4
PSRC1	PRKCQ	CHMP7	MCM8	SDC4	DRAM1
PTGDS	PRLR	CHORDC1	METTL3	FADS1	DRD2
PTGFRN	PROCR	CHP1	MFN1	ACP5	DROSHA
PTPRU	PTEN	CHST14	MIR1247	EMP1	DSCC1
PTTG1	PTGES2	CHTF18	MIR144	MIR330	DSE
PXDNL	PTGS1	CHTF8	MIR182	NR1D2	DSG3
RAB3B	PTHLH	CHTOP	MIR23B	TPX2	DST
RACK1	PTK2	CHTOP.S	MIR28	CPT1B	DTD2
RAD51	PTPN11	CHUK	MIR4524A	IRF7	DTNBP1
RAD54B	PTPN13	CIAO1	MIR630	SLC35D3	DTWD2
RASA1	PTPN6	CIAO2A	MIR761	HSPA4	DTYMK
RASGRP1	PTPN7	CIAO2B	MITF	IL1RAPL2	DUS2
RBKS	PTPRO	CIAPIN1	MLC1	MIR137	DUSP4
RBL1	PTPRR	CIP2A	MLKL	STIP1	DUSP6
RBM3	PTX3	CIRBP	MMP10	ACO2	DUSP7
RBM38	PYCARD	CISD1	MMP12	NCOA2	DUSP8
RECK	RAB8A	CISD2	MMP25	SLC16A3	DYNC2I1
RGN	RAC1	CIT	MOAP1	NES	DYRK1A
RGS5	RAMP1	CKAP4	MOV10L1	VEGFC	DZIP3
RNF14	RARA	CKAP5	MRAP	AGER	E2F1
ROCK2	RASSF2	CKB	MS4A8A	ATG7	EAF1
RPS6	RBM39	CKMT1A	MSGN1	ACSL4	EBAG9
RPS6KA1	RBP1	CKMT2	MSRA	MCM7	ECE1
RPS6KA5	REG3A	CKS1B	MSRB1	NKX6-2	ECI2
RUVBL1	REG3D	CKS2	MT1E	SPIC	ECM1
SAP18	REG3G	CLASP1	MT1H	GUCA2B	ECT2
SAT1	RELB	CLASP2	MT1M	MIR542	EDEM3
SCNN1G	RETNLB	CLCC1	MTTP	SLC22A2	EDNRB
SELENBP1	REV3L	CLCN3	MUC6	TH	EEA1
SERPINB1	RFXAP	CLDN1	MYH3	DIABLO	EEF1A1
SERTAD1	RGS16	CLDN11	NANOG	MCPT8	EEF2K
SKP2	RGS4	CLDND1	NAT8	NT5E	EFHC1
SLC12A2	RGS7	CLEC16A	NBN	POR	EFL1
SLC16A1	RHOA	CLIC1	NCAM2	RASD1	EFNA1
SLC16A3	RHOB	CLIC4	NCOA4	SLC30A1	EFNA4
SLC16A4	RIMS2	CLINT1	NDUFS7	IL24	EFNA5
SLC22A3	RIPK1	CLIP1	NEDD9	EFNA1	EFR3A
SLC22A4	RPL31	CLIP2	NEFH	SYP	EFR3B
SLC23A1	RREB1	CLIP3.S	NEFL	C18ORF25	EHBP1
SLC27A5	RUNX2	CLIPA7	NEK4	CKMT1A	EHD2
SLC2A8	RXRA	CLIPA9	NFATC3	GSTP1	EHMT1
SLC4A11	S100A8	CLIPB12	NFIL3	AICDA	EIF2AK4
SLC7A11	S100A9	CLIPB4	NFKB2	CDK4	EIF2S3
SLC7A9	S100G	CLN3	NOL3	FOXL1	EIF3B
SLCO1B3	SCARB1	CLN5	NOX1	KIF23	EIF3F
SMAD7	SCD2	CLNS1A	NPAS2	CYP2C11	EIF4A2
SMC3	SCRN2	CLPB	NR2E3	MIR324	EIF4B
SMPD1	SDHA	CLPP	NR4A2	TYR	EIF5A
SNAI2	SELL	CLPTM1	NTF3	APOA4	EIPR1
SOD3	SEPTIN7	CLPTM1L	NTHL1	EGLN3	ELAC1
SORBS1	SERPINA3	CLPX	NTRK2	SLC20A1	ELAVL1
SOS1	SERPINB2	CLTA	NUAK2	MIR196B	ELAVL2
SPATA18	SERPINE1	CLTB	OAS2	TUBAL3	ELAVL3
ST13	SERPINE2	CLTC	OGA	ABCC3	ELF1
STK11	SERPINH1	CLUH	OLR104	CCL11	ELK1
SUCLG2	SFPQ	CMAS	OLR1093	NPM1	ELL2
SULT1E1	SFRP5	CMBL	OLR1159	UGT1A1	ELOF1
TAB3	SFXN1	CMC2	OLR1200	ADIPOQ	ELOVL1
TBC1D1	SIRT7	CMPK1	OLR1325	CCN2	ELOVL2
TBXA2R	SKAP2	CMSS1	OLR1381	CLEC4N	ELP4
TCF7	SLC11A2	CMTM6	OLR1416	NTN3	EMC2
TF	SLC16A1	CMTR1	OLR143	CD9	EMD
TFB1M	SLC18A2	CNBP	OLR1439	CSN2	EMG1
TFPI2	SLC1A3	CNDP2	OLR1451	STC2	EML4
TG	SLC20A1	CNFN.1.L	OLR1481	AKT2	EPB41L4A-AS1
TGFBR2	SLC2A1	CNIH4	OLR1668	DCAF12L1	EPB41L4B
TGIF2	SLC2A3	CNN2	OLR1701	FADD	EPHA4
TKT	SLC2A5	CNN3	OLR241	E2F8	EPM2AIP1
TM4SF1	SLC30A1	CNOT1	OLR288	NRBP1	EPN2
TMBIM4	SLC30A10	CNOT10	OLR295	PTPN1	EPPK1
TMEM45A	SLC37A4	CNOT11	OLR424	GHR	EPS8
TNFRSF11A	SLC48A1	CNOT2	OLR436	BMAL1	EPSTI1
TNFRSF1B	SLC6A3	CNOT3	OLR544	MGP	ERBB2
TNFRSF9	SLCO1A2	CNOT7	OLR59	MIR1224	ERC1
TNNC1	SLPI	CNOT9	OLR610	MIR139	ERCC6L2
TNP1	SMAD2	CNP	OLR631	POU5F1	ERGIC2
TOP2A	SMPX	CNPY2	OLR649	SOX2	ERICH1
TOP2B	SNAI1	CNPY3	OLR653	BUB1	ERLEC1
TP53INP1	SNAI2	CNTN1	OLR701	MTHFD2	ERMARD
TP73	SNHG12	CNTNAP1	OLR717	GH1	ERP29
TPI1	SOCS5	COA3	OLR763	HSPB8	ERRFI1
TPM1	SP3	COASY	OLR826	MMP23	ESD
TPO	SP4	COBLL1	OLR828	EXOSC1	ESPNP
TRADD	SPARC	COG1	OMG	DNAJA1	ESR1
TRAF1	SPIB	COG2	ORMDL3	GPNMB	ESR2B
TRPV1	SPOCK1	COG3	OSER1	GRK1	ETAA1
TRPV6	SPP1	COG4	OSGIN1	LRRC24	ETV3
TSHR	SRM	COG5	OTOA	SELP	ETV5
TSPAN3	SRSF1	COG7	P2RX5	SLCO1C1	ETV6
TUBA1A	SRSF2	COIL	PAK6	TTC22	EXOC1
TUFM	SRSF3	COL12A1	PAQR9	ISG15	EXOC2
TWIST1	SRSF5	COL18A1	PCK1	ITK	EXOC4
TXN1	SRSF6	COL1A2	PDE6B	WIPI2	EXOC6
TYK2	STS	COL3A1	PDK4	BRK1	EXPH5
UBE2A	STX3	COL4A2	PDLIM5	MFN2	EYA2
UBE2D2A	SULF2	COL6A1	PFKFB3	MIR503	FADD
UGT1A8	SUZ12	COLGALT1	PGD	SOCS2	FADS3
UGT2B1	SYCP2	COMMD3	PHKB	TAF4	FAIM
UGT2B15	SYN2	COMMD4	PIGA	THBD	FAM102B
UMOD	SYNGAP1	COMMD6	PIM1	FBH1	FAM110B
USP2	T	COMMD8	PIM2	UHRF1	FAM114A1
USP6NL	TADA3	COMMD9	PIP	PDE12	FAM118B
VASN	TALDO1	COMP	PIWIL4	ABCG1	FAM129A
VAT1	TBC1D1	COMT	PLAUR	CDKN1C	FAM177B
VDAC1	TBC1D8	COPA	PLD1	IDH1	FAM3C
VLDLR	TBK1	COPB1	PLD2	MIEF2	FAM50B
VRK2	TERT	COPB2	PLIN2	TBCC	FAM76A
WEE1	TF	COPE	PLPPR1	CYP2B2	FAM83G
WWTR1	TFEB	COPG1	PNPLA3	HMG20A	FANCC
ZBTB14	TGFB1A	COPG2	PNPLA5	NFATC2IP	FANCM
ZC3H6	TGM2	COPRS	PNRC1	NUDT15	FAR2
ZEB2	THBS1	COPS2	POMC	PTTG1	FARS2
ZNF165	THY1	COPS3	PON1	SLC22A8	FASTKD1
ZNF684	TICAM1	COPS4	PPBP	BAG3	FASTKD2
A1BG	TICAM2	COPS5	PRDX2	MIR107	FAU
A1CF	TIMP3	COPS6	PRDX5	MIR425	FBH1
AADAT	TLR1	COPS7A	PRH1	SIRT1	FBN2
AASS	TNC	COPS7B	PRKCB	HNF4A	FBP1
ABCA12	TNFA	COPS8	PRKCE	MIR212	FBXL12
ABCA5	TNFRSF10C	COPZ1	PRL	CD19	FBXL2
ABCA7	TNFRSF10D	COQ9	PRNP	ECH1	FBXL4
ABCA8A	TNFRSF12A	CORO1A	PRX3	S100A6	FBXL5
ABCB4	TNFRSF21	CORO1B	PSMB10	ALAS1	FBXL7
ABCC6	TNFSF12	CORO1C	PSMB8	CHTOP	FBXO48
ABCD3	TNFSF14	CORO7-PAM16	PSMD4	CYP2C8	FCHO2
ABCF2	TNKS	COTL1	PSME4	IL18	FCHSD2
ABCG8	TNNI3	COX1	PTK2	IRF2BP1	FCRL3
ABHD14B	TP53BP2	COX15	PTK2B	KRT9	FEM1A
ABHD4	TPH1	COX17	PTK6	MIR191	FEM1C
ABHD5	TRADD	COX2	PTX3	TUBB3	FER
ABHD6	TRAF2	COX20	PYGL	HMGB2	FERMT2
ABL1	TRAF3	COX3	RAB24	CA5A	FGD6
ABLIM3	TREM1	COX4I1	RAB7A	CFAP53	FGF1
ABRACL	TRIB3	COX5A	RAD1	FCER1A	FGF12
ABRAXAS1	TRIM15	COX5B	RAD18	THRSP	FGF18
ABTB3	TRIM16	COX6B1	RAD51B	CLCN7	FGFBP1
ACAA1	TRPV6	COX6C	RAD9A	FBXO43	FILIP1L
ACAA2	TSC2	COX7A2	RBPJ	LEMD3	FKBP10
ACAD11	TXN	COX7A2L	REN	MIR142	FKBP9
ACADSB	TXNIP	CP	RGS16	NELFB	FLNA
ACADVL	TYROBP	CPD	RGSL2H	SLC22A1	FLRT2
ACAT1	UBC	CPLCG1	RHOBTB1	WDR13	FMNL2
ACBD7	UBE2C	CPLX2	RIPK2	ZCCHC3	FN1
ACE2	UCP1	CPM	RNASE2	OTUD5	FNBP1L
ACER3	UGT1A10	CPNE1	RNF125	RETNLG	FNDC3A
ACO1	UGT1A6	CPNE2	RORA	AMMECR1L	FNDC3B
ACOT13	UGT1A7	CPNE3	RXRA	PDIA3	FNDC7
ACOT3	UGT1A8	CPNE8	S100A4	STYX	FOCAD
ACOX1	UGT1A9	CPOX	S100A9	CXCL9	FOSB
ACOX3	UGT2B5	CPR16	SAO	CYP4A3	FOXO3
ACP3	UTP14A	CPR75	SAT1	PNMT	FOXP1
ACSF2	VASP	CPS1	SCD1	SLC39A3	FRMD6
ACSL5	VCAN	CPSF1	SDHB	CNMD	FRS2
ACSL6	VDAC1	CPSF2	SDR16C6	IRS2	FRYL
ACSM3	VHL	CPSF3	SELENOI	KLF9	FUCA2
ACSM5	WASL	CPSF4	SERPINE1	NRP1	FUT8
ACSS3	XDH	CPSF6	SFRP2	GZF1	FXN
ACTA1	XPO1	CPSF7	SFTPA1	NEFL	FXYD5
ACTC1	XRCC5	CPT2	SHISA2	OXA1L	FYN
ACTN1	XRCC6	CRAT	SLA2	SPINK5	FZD1
ACTN4	YAP1	CREB1	SLC10A2	TAF1C	FZD2
ACTR1A	YPEL3	CRELD2	SLC12A1	ASS1	G2E3
ACTR1B	ZFHX3	CRHBP.S	SLC12A3	GGT7	G6PC
ACTR6	ZFP36L1	CRIM1	SLC19A2	KNG1	G6PC1
ACY1	ZNF287	CRIP1	SLC22A17	MMP14	GAA
ACYP1	ZNF589	CRIP2	SLC22A24	TXNDC12	GAB1
ADAL	ZNF823	CRIPT	SLC22A8	BCORL1	GAB2
ADAM12		CRK	SLC24A2	RHOB	GABRE
ADAM15		CRKL	SLC25A47	SLC16A1	GAD1
ADAM9		CRLF3	SLC27A2	CCDC9	GAL
ADAMTSL4		CRMP1	SLC2A2	PGK1	GALM
ADD3		CROT	SLC2A4	TEX10	GALNT1
ADGRA3		CRP	SLC30A1	CPT2	GANAB
ADGRB1		CRTAP	SLC31A1	KAT8	GASK1B
ADGRE5		CRYAB	SLC35D2	AAK1	GATB
ADGRF1		CRYL1	SLC38A2	ACADM	GBE1
ADGRG4		CRYM	SLC38A3	COL20A1	GBP1
ADGRG6		CRYZ	SLC39A14	LNPK	GBP2
ADGRG7		CRYZL1	SLC40A1	WIPF2	GBP3
ADGRL2		CS	SLC4A1	CYP3A2	GBP4
ADGRV1		CSDE1	SLC5A5	ADNP2	GCA
ADH4		CSE1L	SLC6A6	ANXA3	GCC1
ADH5		CSK	SLC7A14	BCL2L15	GCLM
ADH6		CSNK1A1	SLFN8	COMMD8	GCNT1
ADK		CSNK1D	SMPD1	DDX49	GCNT2
ADM		CSNK2A1	SMPD2	TFF1	GDF9
ADNP		CSNK2A2	SNAI2	TXNRD1	GDPD1
ADORA2A		CSNK2B	SNTG1	CHRD	GEMIN6
ADPRM		CSP11	SOAT1	DHFR	GFPT2
ADRA2C		CSP12	SORD	FADS2	GIGYF2
ADRB2		CSP13	SOX9B	PER2	GINS1
ADRM1		CSP2	SPHK1	SMAD2	GIT2
ADSS1		CSP20	SPOCK2	CD68	GJA4
AEN		CSP3	SRMS	FTO	GLCCI1
AFDN-DT		CSP4	STK11	CA2	GLI2
AFG3L1		CSP5	SULT1E1	CCL25	GLIDR
AGBL2		CSP6	SUMO1	CHAMP1	GLMN
AGE-1		CSP7	SVS3A	CYP26A1	GLRX2
AGER		CSP8	SYT7	EMID1	GLS
AGL		CSRP1	TAAR7E	FHIP2A	GLT8D1
AGMAT		CSRP2	TANK	GZMK	GMPR
AGO2		CSRP2.L	TARDBP	HDAC1	GNAI1
AGR2		CSTB	TAS2R108	METTL27	GNAQ
AGTPBP1		CSTF1	TBX21	MIR134	GNE
AGTR1		CSTF2	TCP10B	MT1L	GNL3
AHNAK2		CSTF2T	TET2	NXPH1	GNPTAB
AHSG		CSTF3	TFRC	PYGO1	GNRH1
AIG1		CTBP1	TGFA	TMEM192	GOLGA1
AIR		CTBP2	TGFB1I1	VTA1	GOLIM4
AK3		CTDNEP1	TIPARP	KCNK12	GOT2
AKAP12		CTDP1	TJP2	NHS	GPAM
AKIRIN1		CTH	TMEM140	SLC1A2	GPATCH4
AKIRIN2		CTLH2_ANOGA	TMPRSS2	TP53I11	GPHN
AKR1B1		CTNNA1	TNFAIP3	ABCG2	GPR107
AKR1C14		CTNNB1	TNFRSF13C	CCL20	GPR160
AKR1C2		CTNNBL1	TNFRSF1B	MLST8	GPR180
AKR1C6		CTPS1	TNPO1	UBE2C	GPR39
AKR1D1		CTPS2	TOMM20	NAMPT	GPR87
AKR1E2		CTPS2.L	TOP2A	CCR9	GPRC5B
AKR7A5		CTR1_ANOGA	TPM1	KRI1	GPSM2
AKT1S1		CTR9	TPO	MCM5	GRAMD1B
ALAS1		CTSA	TRAF2	MIR145	GRAMD2B
ALDH1A1		CTSB	TRIB1	PANK4	GREB1L
ALDH3A2		CTSC	TRIM22	SPATS2	GRK3
ALDH5A1		CTSD	TRIM28	UBE2Q1	GRN
ALDH6A1		CTSL.L	TROAP	EDA	GSAP
ALDH7A1		CTSS.L	TRPC7	KCNA3	GSDME
ALDH8A1		CTSV.L	TSC2	SLC12A9	GSK3A
ALDH9A1		CTSZ	TSC22D3	ARNT	GSTA1
ALDOC		CTTN	TSHB	AVL9	GSTA4
ALG10		CTTNBP2NL	TSP1	CLEC4A3	GSTM1
ALG13		CUL1	TSPAN6	CUBN	GSTP1
ALG14		CUL2	TTC7B	GST-4	GTF2H5
ALG6		CUL3	TTC9B	JUND	GTF2IRD1
ALKAL2		CUL4A	TUBB3	MIR132	GTF3C2
ALKBH7		CUL4B	TXN1	MIR203	GTF3C4
ALMS1		CUL5	TXNDC8	MS4A6B	GTPBP2
ALOX5AP		CUL7	TXNL1	SLC10A1	GULP1
ALPK2		CUTC	TXNRD1	TFEB	H1-0
ALT		CWC27	TYMP	TNC	H1-1
AMACR		CWF19L1	UBXN1	TNPO3	H1-2
AMDHD1		CXADR	UFM1	TTC9C	H1-3
AMMECR1		CYB561.L	UGDH	AP3B1	H1-4
AMN1		CYB5A	UHRF1	DOLK	H1-6
AMOTL2		CYB5B	USPL1	EXOSC7	H2AC21
AMPD2		CYB5R3	UVRAG	GRIPAP1	H2AC6
AMPD3		CYB5R4	VDAC2	MTCL1	H2BC1
AMT		CYBC1	VDR	RAP2C	H2BC14
ANAPC1		CYC1	VEGFB	SLC9A6	H2BC9
ANAPC10		CYCS	VNN1	USP28	H4C9
ANAPC15		CYFIP1	WNT1	CARM1	HACD4
ANAPC4		CYFIP2	XDH	CCNE2	HAND2
ANG		CYP-14A2	XRCC3	CLDN1	HAPLN3
ANGPTL4		CYP-14A5	XRCC6	FOSB	HAPSTR1
ANGPTL8		CYP1A2	YWHAZ	HSD11B1	HAS1
ANK2		CYP27A1	ZBTB16	PDE1B	HBA1
ANKEF1		CYP27C1.L	ZDHHC19	UNC119	HDAC5
ANKHD1		CYP2A4	ZFAND2A	KLRD1	HDAC8
ANKMY2		CYP2A5	ZFHX4	NODAL	HEATR3
ANKRA2		CYP2B19	ZFP36L2	PIK3R4	HEATR5B
ANKRD10		CYP2C29	ZFP395	RIPPLY3	HEATR6
ANKRD12		CYP2C9	ZFX	ARMC1	HECA
ANKRD16		CYP2D22	ZMYM2	ATP2A2	HEG1
ANKRD37		CYP2S1	ZNF394	CCDC124	HEMK1
ANKS4B		CYP-37B1	ZP3	DNAJC11	HERC4
ANLN		CYP46A1.2.L		EBF2	HERC6
ANO1		CYP51A1		MAPK9	HERPUD1
ANP32A		CYP6Z1		MRPS9	HERPUD2
ANP32E		CYRIB		MUC4	HES1
ANPEP		CYTB		PSMG3	HEXIM1
ANTXR2		CZIB		TMEM11	HGSNAT
ANXA3		DAB2		AFP	HHEX
ANXA4		DAD1		ALDOA	HHIPL2
ANXA5		DAG1		ARHGAP27	HIBCH
ANXA6		DAGLB		EIF2B1	HIF1AN
ANXA8		DAP		KCNH2	HIKESHI
AOC2		DAP3		MS4A1	HIP1
AOX1		DARS1		CYBA	HLCS
AP1M2		DARS2		NACC1	HLTF
AP1S1		DAXX		AP5Z1	HMGA2
AP1S2		DAZAP1		CRLF3	HMGB1
AP3M2		DBI		SLC12A1	HMGN3
APBA3		DBN1		STX4	HMMR
APBB2		DBNL		LRWD1	HMOX2
APLN		DBR1		MCM6	HMSD
APLP1		DCAF1		MTCH1	HMX3
APOA4		DCAF10		OCRL	HNRNPA1
APOA5		DCAF11		SPG21	HNRNPA1L2
APOBEC3B		DCAF7		VTI1B	HNRNPF
APOBEC3G		DCAKD		DNAJB1	HNRNPH1
APOC1		DCBLD2		DTX3	HOMER1
APOC2		DCD		ISLR2	HOXB9
APOC3		DCK		SLAMF7	HPF1
APOH		DCLK1		FAM120C	HPS3
APOLD1		DCPS		HBA2	HPS5
APOV1		DCTD		HES1	HSD17B7P2
APPL2		DCTN1		IL12A	HSDL2
APRG1		DCTN2		KRT2	HSP90AA2P
AQP11		DCTN3		NCLN	HSP90AB2P
ARAF		DCTN4		NTRK2	HSP90B2P
ARAP2		DCTPP1		PSAT1	HSPA1B
AREG		DCUN1D1		SLC30A9	HSPA1L
ARF3		DCXR		TRIM21	HSPA4
ARFGEF1		DDAH1		ZC3H7B	HSPA4L
ARFGEF3		DDAH2		ZIC3	HSPB7
ARG2		DDB1		CFLAR	HSPE1
ARHGAP11A		DDB2		EMC3	HTR1D
ARHGAP17		DDHD1		MRPL53	HTRA2
ARHGAP18		DDI2		PACSIN1	HYLS1
ARHGAP19		DDIT4.S		POLR2E	IBTK
ARHGAP27		DDOST		SH3BP1	ICOSLG
ARHGAP29		DDRGK1		TOE1	ID2
ARHGAP44		DDT		TXNDC9	IDE
ARHGAP45		DDX1		CIP2A	IDI1
ARHGAP5-AS1		DDX17		M6PR	IDI2-AS1
ARHGEF28		DDX18		TICAM2	IER2
ARHGEF3		DDX19A		CEP95	IFI27
ARID2		DDX20		MAB21L2	IFI44
ARL13B		DDX21		MIR130A	IFI6
ARL15		DDX23		MIR183	IFIT3
ARL4D		DDX27		RAD51	IFIT5
ARL6		DDX39A		RARA	IFITM1
ARL6IP5		DDX39B		SOX12	IFITM3
ARMCX5		DDX3X		SULT2A2	IFNLR1
ARMT1		DDX42		AQP2	IFT46
ARRB1		DDX46		MT1B	IFT74
ARRDC2		DDX47		FAF2	IFT80
ARRDC3		DDX49		GCN1	IFT81
ARSA		DDX50		ISY1	IFT88
ARSG		DDX51		LGALS3	IGF2
ARSL		DDX56		MORF4L1	IGF2BP3
ART4		DDX6		PAX2	IKBKG
ARVCF		DECR1		RAB11FIP5	IKZF2
ASAH1		DECR2		RANBP6	IL10
ASAP2		DEF6		TMEM184C	IL11
ASB16		DEF8		BTC	IL1R1
ASB16-AS1		DEK		COPS5	IL2
ASB2		DENND10		HSPH1	IL23A
ASB6		DENND4C		KLF6	IL5
ASB9		DENR		NPHS2	IL7
ASCC3		DERA		RPS6KB2	IL7R
ASF1B		DERL1		TNFSF11	ILF2
ASGR1		DERL2		EDC3	ILF3
ASL		DES.2.S		INSM1	IMMP1L
ASPH		DFFA		INSR	IMPG2
ASPHD1		DHCR24		MIR30E	INPP5A
ASPM		DHCR7		MPHOSPH8	INSIG1
ASPRV1		DHFR		PIP4P1	INTS10
ASPSCR1		DHODH		SYT4	INTS8
ASRGL1		DHPS		THAP1	INTS9
ASS1		DHRS1		ACLY	INTU
ASTE1		DHRS7		ARL2	INVS
ATF2		DHRS7B		BAG5	IP6K2
ATF6B		DHTKD1		DNAAF1	IPO11
ATF7IP		DHX15		ERI1	IRAK1BP1
ATG16L2		DHX16		LRRC8E	IRAK3
ATG2A		DHX29		PAX8	IREB2
ATG3		DHX30		POGZ	IRF2
ATG5		DHX36		SEC11A	IRF9
ATL1		DHX38		TMEM160	IRS2
ATL2		DHX40		ISL1	ISCA2
ATP13A1		DHX57		NPY	ISL2
ATP1A1		DHX58.L		BMP8B	ITCH
ATP1B3		DHX8		FOXO3	ITGA4
ATP23		DHX9		IL32	ITGA6
ATP2A1		DIABLO		MZF1	ITGAV
ATP2A2		DIAPH1		NIPA1	ITGB1BP2
ATP5F1A		DICER1		PHGDH	ITPRIP
ATP5F1B		DIDO1		RASIP1	ITSN1
ATP5MC1		DIMT1		SAMD8	IWS1
ATP5MF		DIO1		STMN3	JAG1
ATP6V0B		DIP2B		TPM1	JAK2
ATP6V1E2		DIS3		TRHDE	JARID2
ATP7A		DIS3L2		VPS8	KANK1
ATP8B1		DKC1		LGALS7	KANSL2
ATP9A		DKK1		MT2	KAT14
ATR		DLAT		PALM	KAT2B
ATXN2		DLD		SLC6A3	KAT5
AURKA		DLG1		DTD1	KAT6A
AURKB		DLG3		LSM12	KAT6B
AXL		DLG4		MRPL58	KATNAL1
B3GAT3		DLGAP5		PLIN2	KATNBL1
B3GLCT		DLST		RHOT1	KATNIP
B3GNTL1		DMBT1		SNW1	KAZN
B4GALNT1		DMXL2		CYP2D9	KBTBD2
B4GALT4		DNAAF1		GOLGA2	KCNMB4
BAAT		DNAAF5		MIR15B	KCTD10
BACE1		DNAH1		MIR214	KCTD16
BAG2		DNAJA1		MYL7	KCTD9
BAG4		DNAJA2		PACC1	KDELR3
BAIAP2		DNAJA3		PPP1R3G	KDM4C
BAMBI		DNAJB11		GRSF1	KHDC4
BAZ1A		DNAJB13		IL1R1	KHK
BAZ2B		DNAJB4		MAGOHB	KIAA0586
BBS12		DNAJB6		MRPS36	KIAA1328
BBS2		DNAJC10		POU4F2	KIAA2026
BBS4		DNAJC11		TMEM214	KIF13A
BBS5		DNAJC13		ARL6IP4	KIF14
BBS9		DNAJC2		CPSF1	KIF15
BCAM		DNAJC3		LRSAM1	KIF16B
BCAR1		DNAJC7		SAFB2	KIF18A
BCAR3		DNAJC8		SLC30A5	KIF20B
BCAT1		DNAJC9		TSNAX	KIF4A
BCKDK		DNASE2		CXCL6	KIFAP3
BCL2A1		DNER		MOB4	KIT
BCL2L14		DNHD1		NOS1	KL
BCL2L15		DNM1		SAE1	KLF10
BCL2L2		DNM1L		AASDHPPT	KLF7
BCL9		DNM2		ARHGAP31	KLHDC2
BCOR		DNMT1		GFER	KLHDC3
BCR		DNPEP		HOXB2	KLHL12
BDH1		DNPH1		HPS5	KLHL15
BDKRB1		DNTTIP1		MAVS	KLHL18
BDNF		DNTTIP2		MYOM2	KLHL20
BEND5		DOCK1		BLK	KLHL21
BEX1		DOCK10		CDC20	KLHL26
BFAR		DOCK4		CHMP4B	KLHL9
BGN		DOCK6		DHX29	KLRA1
BHMT2		DOCK7		FUBP3	KNSTRN
BIK		DPCD		IGSF8	KNTC1
BIRC2		DPM1		MAP1S	KPNB1
BIRC3		DPM3		MINK1	KRIT1
BIVM		DPP8		RAB12	KRT1
BLOC1S2		DPP9		SLC30A4	KRT77
BLVRB		DPY19L1		SSH2	L3MBTL3
BMAL1		DPY30		STRAP	LACTB
BMAL2		DPYD		VPS33B	LACTB2
BMERB1		DPYS.L		ADAMTSL2	LAMTOR2
BMP1		DPYSL3		ISL2	LATS2
BMP2K		DPYSL5		KCNG3	LCAT
BMP3		DRAM1.L		MAML1	LDAH
BMP4		DRAP1		MIR99A	LDLRAD3
BMP8A		DRG1		MT1A	LEAP2
BMP8B		DRG2		TREM1	LENG8
BMPR1A		DSG2		ARCN1	LEP
BMT2		DST		MED23	LGALS3BP
BNIP3L		DSTN		SRSF9	LGR4
BORA		DTD1		COL2A1	LHFPL6
BORCS7		DTYMK		NUDT19	LIG3
BPIFB2		DUSP12		PARN	LIMD1
BPTF		DUSP3		TERT	LIN9
BRAF		DUT		TXNIP	LINC00324
BRAP		DYM		FRS2	LINC02210
BRD2		DYNC1H1		PRMT2	LMAN2L
BRD7		DYNC1LI1		SLC14A2	LMBR1
BRDT		DYNC1LI2		TRIM11	LMBRD1
BSCL2		DYNLL1		CRIPT	LNPEP
BSG		DYNLL2		KRT80	LOX
BSN		DYNLRB2		PTS	LPAR4
BTBD2		DYNLT1		S100A9	LPCAT4
BTF3L4		DYNLT3		STX6	LPIN1
BTG1		DYRK1B		SUPV3L1	LRBA
BTG2		EARS2		CDX2	LRCH1
C11ORF52		EBF2		CRYZL1	LRCH3
C11ORF54		EBNA1BP2		FABP1	LRP11
C11ORF96		EBP		GET1	LRRC28
C12ORF60		ECE1		GSPT2	LRRC40
C12ORF75		ECH1		JAK3	LRRC49
C14ORF28		ECHDC1		STXBP5	LRRC61
C15ORF48		ECHS1		TLR9	LRRC7
C16ORF87		ECI1		CANT1	LRRC8A
C17ORF100		ECI2		CLEC4D	LRRC8D
C17ORF58		ECM1		CSRNP2	LRRCC1
C17ORF75		ECPAS		DCAF8	LRRD1
C18ORF54		ECRG4.L		FEM1C	LRSAM1
C19ORF18		ECSIT		ID2	LSM10
C19ORF25		ECT2		PXK	LSMEM1
C1D		EDARADD		SCAMP5	LSR
C1GALT1		EDC3		WNT2B	LXN
C1GALT1C1		EDC4		BCAS2	LYPD6
C1ORF115		EDEM1		CEBPD	LYST
C1ORF162		EDEM3		FAU	LZTR1
C1ORF216		EDF1		IDI1	M1AP
C1S		EEA1		LEPROTL1	MACROH2A2
C2CD2		EED		MYDGF	MAEL
C2CD4A		EEF1A1		NEDD8	MAF
C2CD5		EEF1A2		PYCR2	MAFF
C2ORF49		EEF1AKMT4		TM9SF2	MAFG
C2ORF72		EEF1B2		CEP170	MAGI1
C2ORF76		EEF1D		COQ9	MAL2
C3ORF33		EEF1E1		DYNLT1	MALT1
C3ORF38		EEF1G		MPHOSPH6	MAML2
C3ORF52		EEF2		PHPT1	MAMSTR
C4BPA		EEFSEC		RRP1	MAN2A2
C4BPB		EFHD2		SATB1	MANEA
C4ORF3		EFTUD2		TMEM165	MAP2K6
C4ORF48		EGFR		TSPAN14	MAP3K1
C5		EGLN1		WDR45B	MAP3K14
C5AR1		EGLN3		YLPM1	MAP3K8
C5AR2		EGLN3.L		IL9	MAP4K3
C5ORF34		EHBP1		MFAP3L	MAPK9
C6ORF226		EHD1		MIB1	MAPKAPK5
C6ORF52		EHD2		MIR150	MAPRE3
C7ORF50		EHD4		MOG	MARCHF3
C8A		EHHADH		SFMBT2	MAT2A
C8B		EHMT1		SYNGR3	MBNL2
C8G		EHMT2		TSR1	MBOAT1
C9ORF152		EI24		GMPPA	MC1R
C9ORF85		EIF1		HSP90B1	MCOLN2
CA2		EIF1AX		ITCH	MCU
CABIN1		EIF2A		MRPS17	MDH1
CABLES1		EIF2AK2		POFUT2	MDH2
CACNA1D		EIF2AK4		PPHLN1	MDM2
CACNG6		EIF2B1		PSMD9	MED11
CACYBP		EIF2B2		CFDP1	MED12L
CAD		EIF2B3		CHMP2A	MED13L
CALB1		EIF2B5		DYM	MED26
CAMK1		EIF2S1		LECT2	MED7
CAMK2A		EIF2S2		NAPA	MED9
CAMK2B		EIF2S3		POLD2	MEDAG
CAMKMT		EIF3A		TMEM39A	MEIS2
CAMSAP3		EIF3B		ATF6	MELK
CAMTA2		EIF3C		CD28	MET
CAND1		EIF3D		CLIC6	METTL15
CAPN15		EIF3E		DDX23	METTL18
CAPRIN2		EIF3F		KRAS	METTL4
CAR3		EIF3G		RORB	METTL8
CAR8		EIF3H		S100A16	MEX3C
CARNMT1		EIF3I		ATP6V1E1	MFGE8
CASD1		EIF3J		BATF	MGARP
CASP12		EIF3K		CLPTM1L	MGAT5
CASP14		EIF3L		CORO6	MGST1
CASP2		EIF3M		MAS1	MICU3
CASP8AP2		EIF4A1		OXSR1	MIEF1
CATSPER3		EIF4A2		RAB21	MIER1
CAV2		EIF4A3		RGS11	MIPOL1
CAVIN1		EIF4B		SLCO2B1	MIR98
CAVIN2		EIF4E		CD84	MIS18A
CBR4		EIF4EBP1		DDX50	MITF
CBS		EIF4G1		EXOC8	MKLN1
CBX2		EIF4G2		KLK8	MKRN1
CBX5		EIF4G3		MINPP1	MKX
CBX6		EIF4H		NCOA5	MLLT10
CC2D1B		EIF5		PEG3	MMACHC
CCDC126		EIF5A		PTPN23	MMP8
CCDC138		EIF5B		SENP6	MNS1
CCDC15		EIF6		TEAD1	MOCOS
CCDC17		EIPR1		ZDHHC14	MON2
CCDC62		ELAC2		SOX3	MOS
CCDC68		ELAVL1		SULT4A1	MOSPD2
CCDC69		ELF1		TMC4	MOV10
CCDC81		ELMO2		TMEM100	MPHOSPH6
CCDC88A		ELMOD2		WAS	MPHOSPH9
CCDC92		ELOB		WDR72	MPI
CCHCR1		ELOC		IGFBP1	MRE11
CCKAR		ELOVL1		MAGT1	MRPL16
CCL12		ELOVL5		MRE11	MRPL46
CCL13		ELP1		NUFIP2	MRPS11
CCL15		ELP2		PLVAP	MRPS16
CCL16		ELP3		PTPN22	MRPS18A
CCN1		ELP5		SDF4	MRPS2
CCNB1IP1		EMC1		WDR46	MRTFB
CCNF		EMC10		ARL8A	MSH2
CCNG2		EMC2		CGGBP1	MSL3L2
CCPG1		EMC3		CLINT1	MSMO1
CCR6		EMC4		CNOT7	MTERF3
CCR7		EMC7		DDX20	MTFMT
CCR9		EMC8		DNPEP	MTFP1
CCRL2		EMD		EIF3M	MTM1
CCT5		EMG1		KMT2B	MTRES1
CD109		EML1		MIR200B	MTRF1L
CD151		EML2		PCNP	MTX2
CD24		EML3		PFDN4	MVK
CD38		EML4		UBXN1	MVP
CD3D		EMP3		XCL1	MX2
CD46		ENAH		XRN1	MYBBP1A
CD55		ENDOD1		ARG1	MYBL1
CD58		ENO1		BSPRY	MYBPC3
CD59		ENO2		GNPAT	MYEF2
CD7		ENO3		IFT57	MYH10
CD83		ENO3.L		MNT	MYLIP
CD9		ENOPH1		SEC24A	MYO10
CD93		ENSA		SLC38A5	MYO1B
CDA		ENY2		SP1	MYO1E
CDC14A		EOGT		STX16	MYO6
CDC16		EP300		TMEM14C	MYO9A
CDC25A		EPB41L1		TOM1	MYOF
CDC27		EPB41L1.S		IFNA1	MYPN
CDC2L1		EPB41L2		MUC2	MYSM1
CDC37		EPHA2		RHO	NAA15
CDC42		EPHX1		ACTR1A	NACA4P
CDC73		EPN1		DCAF7	NADK2
CDCA3		EPN2		GTPBP1	NAE1
CDCA5		EPPK1		LRRC1	NAGK
CDCA7L		EPRS1		MIR192	NAPEPLD
CDH11		EPS15		MIR221	NAPG
CDH17		EPS15L1		MMGT1	NARS2
CDIP1		EPS8		PHC3	NAT1
CDK10		EPS8L2		PPP6R3	NAT10
CDK5R1		ERAP1		STT3B	NBAS
CDK5RAP2		ERAP2		TAOK3	NBEAL1
CDK8		ERC1		TF	NBN
CDK9		ERCC2		TRIM29	NCAPD3
CDKAL1		ERF		COX7A2L	NCAPH
CDO1		ERF.S		JMY	NCF2
CDR2L		ERGIC1		MGMT	NCK1
CDRT4		ERGIC3		NUDT16L1	NCOA7
CDS1		ERH		RBM22	ND6
CDT1		ERI1		RMND5A	NDC80
CEACAM5		ERLEC1		RPL38	NDRG1
CEBPD		ERLIN1		SAP30	NDST2
CEL		ERLIN2		SIL1	NDUFAF1
CELF1		ERMP1		SLC39A1	NDUFS8
CELSR3		ERO1A		IL5	NDUFV2
CEMIP		ERP29		TAGLN3	NEAT1
CEMIP2		ERP44		ACSL1	NEDD1
CENPA		ESD		AGO1	NEDD4
CENPC		ESYT1		DOCK6	NEDD4L
CENPE		ESYT2		HIF1AN	NEDD9
CENPI		ETF1		IARS2	NEIL3
CENPJ		ETFA		IWS1	NEK1
CENPK		ETFB		MANSC1	NEK3
CENPU		ETFDH		MIR146A	NEK6
CENPW		ETHE1		PPP1R9B	NEXN-AS1
CENPX		ETV6		PRMT3	NFIL3
CEP128		EWSR1		SCYL1	NFKBIA
CEP135		EXOC1		TOR1AIP1	NFKBIB
CEP170B		EXOC2		UBE2G1	NFS1
CEP55		EXOC3		VPS33A	NFX1
CEP68		EXOC4		ARFGEF2	NFYA
CEP70		EXOC5		COPG1	NFYB
CEP72		EXOC6B		GTF2A1	NGLY1
CEP78		EXOC7		HACD3	NGRN
CEP83		EXOC8		HLA-C	NIF3L1
CEP89		EXOSC1		NDUFB10	NIT1
CEP95		EXOSC10		SCG5	NLK
CES1C		EXOSC2		SUGT1	NME7
CES2		EXOSC3		UBE2M	NMI
CFAP251		EXOSC4		ATG4B	NNMT
CFAP74		EXOSC5		CBX3	NOB1
CFI		EXOSC6		EHBP1L1	NOC3L
CFL1		EXOSC7		ITPA	NOCT
CGNL1		EXOSC9		JCHAIN	NOLC1
CHAC2		EXT1.S		RPL34	NOP53
CHAF1B		EZR		TMEM117	NOX4
CHCHD10		F11R		B3GALT6	NPEPPS
CHD1L		F13A1		CCNY	NR2C2AP
CHIL3		F5		CLASP1	NR4A1
CHML		FABP5		DCTN1	NR4A2
CHN2		FADD		DPP8	NR4A3
CHORDC1		FADS2		EIF3F	NREP
CHPF		FAF1		EXOC7	NRIP1
CHRM1		FAF2		HBS1L	NSF
CHRM2		FAH		IBSP	NSL1
CHRM3		FAHD1		LRRC8A	NSMCE4A
CHRM4		FAHD2A		MTA2	NSUN6
CHRM5		FAIM		NFYC	NUAK1
CHRNA10		FAM114A1		POLR1A	NUBP1
CHST13		FAM114A2		SRPRA	NUDCD1
CHST14		FAM120A		WAPL	NUDT12
CHST15		FAM120C		APPL1	NUDT4
CHST3		FAM136A		MMP3	NUF2
CHST5		FAM162A		SERINC1	NUMB
CHST9		FAM162A.L		TTR	NUP107
CHTF18		FAM177A1		ANXA1	NUP133
CHTF8		FAM192A		ASAH2	NUP160
CIAPIN1		FAM234A		MAGEE1	NUP85
CIB3		FAM241B		PDAP1	NUP98
CIDEB		FAM3C		RAB5B	NXF1
CIDEC		FAM50A		RANBP2	NXPH4
CIP2A		FAM83A.L		RIC8A	OAS1
CIPC		FAM91A1		SF3B1	OAS2
CIRBP		FAM98A		SLC35E1	OAS3
CIT		FAM98B		SUMF1	ODAD2
CITED1		FANCD2		UBE2A	ODC1
CITED2		FANCI		VPS26A	ODF2L
CKLF		FAR1		YIPF5	ODR4
CKM		FARP1		AQP5	OGA
CLASP2		FARSA		BLMH	OGDH
CLCN3		FARSB		ITM2C	OGT
CLCN5		FAS		TOR1B	OIP5
CLDN14		FASTKD2		WNT10B	OLFML2B
CLDN23		FAT1		CLN6	OLR1
CLDN8		FAT3		CTH	ONECUT2
CLGN		FAU		HTRA3	OPHN1
CLIP2		FBL		RLIM	ORAI2
CLK1		FBLIM1		UBR2	ORMDL2
CLMN		FBLL1		ATE1	OSBPL3
CLN5		FBLN1		BAG6	OSER1
CLP1		FBP2.L		CYP2A4	OSGEP
CLPX		FBXL22		GLT8D1	OSGEPL1
CLSPN		FBXO2		KRTCAP2	OVGP1
CLTB		FBXO21		NELFA	OXSM
CLTRN		FBXO22		NLRX1	P4HB
CLYBL		FBXO3		NUTF2	P76
CMBL		FBXO7		PGAM5	PA2G4
CMPK2		FBXW2.L		SAMM50	PAAF1
CMTM7		FCER2		SSB	PABPC3
CMTR2		FDFT1		UBR1	PABPC4
CNNM4		FDPS		VPS29	PAGR1
CNOT8		FDXR		XPO7	PALS2
CNOT9		FEN1		CA9	PARG
CNTNAP1		FERMT2		COMP	PARK
CNTRL		FH		RABEP1	PARK7
COA7		FHIP2A		SLC33A1	PARP12
COBLL1		FHL1		AFDN	PARP4
COG5		FHL2		BMS1	PARP6
COG6		FHL3		CA1	PARP8
COIL		FHOD1		CDYL	PARP9
COL18A1		FIP1L1		DENR	PARVG
COL1A2		FIS1		ERGIC1	PBRM1
COL2A1		FKBP10		GFM1	PBX2
COL6A3		FKBP14		GOLPH3	PCARE
COL7A1		FKBP15		MEOX2	PCCA
COLEC12		FKBP1A		MIR30A	PCDH10
COMMD1		FKBP2		MN1	PCF11
COMMD10		FKBP3		MRPL38	PCGF2
COMMD8		FKBP4		PIK3R1	PCID2
COPE		FKBP8		SART1	PCNA
COPS2		FKBP9		SCFD1	PCSK9
COPS4		FLAD1		SFTPC	PCTK2
COPS5		FLII		TBCB	PDE7B
COPS8		FLNA		ATP5PO	PDGFC
COQ10B		FLNB		CELA1	PDHB
CORO2A		FLNC		CXCR4	PDIA3
CORO2B		FLOT1		FNIP1	PDK1
COTL1		FLOT2		IGHM	PDRG1
COX11		FLRT3		IL13	PDS5B
COX19		FMNL2		IPO4	PDXP
COX2		FMR1		PRF1	PDZD2
COX20		FN1		CYRIA	PECAM1
COX3		FN3KRP		ENO1	PELI1
COX4		FNBP1L		GJC1	PER1
COX5A		FNBP4		GNRHR	PEX11B
COX5B		FNDC3A		ING1	PEX2
COX6B1		FNDC3B		LRATD1	PEX3
CPB2		FNTA		MIR200C	PFKFB3
CPED1		FOCAD		CDH4	PFKL
CPN1		FOS		CUL4B	PFN1
CPN2		FOSAB		DDX56	PGK1
CPNE2		FOSL2		DIAPH1	PGK2
CPQ		FOXI1.L		DYNC1LI2	PGR
CPS1		FOXO3		FUCA2	PHACTR2
CPT2		FOXQ1B		KITL	PHACTR4
CPVL		FOXRED1		MPC2	PHAF1
CRACD		FPGS		P3H3	PHF11
CREB3L2		FRA10AC1		PAK4	PHF19
CREB3L3		FRG1		PPP1R18	PHIP
CRELD2		FRYL		PRCP	PHKG1
CRH		FSCN1		PRSS1	PHLDA2
CRIPT		FSTL5		RRM2	PHLDB1
CRISP1		FTH1		SAP30BP	PIAS1
CRLF1		FTL		STK26	PIBF1
CRLF3		FTO		UBA2	PICALM
CRLS1		FTSJ3		UPF2	PICK1
CRYBG1		FUBP1		APAF1	PID1
CRYGS		FUBP3		ERBB2	PIGF
CRYL1		FUCA1		PDGFD	PIGP
CRYM		FUCA2		SLCO1A2	PIGV
CSAD		FUS		SOCS3	PIK3CB
CSF3R		FXN		CD2BP2	PIK3CD
CSGALNACT1		FXR1		CHGB	PIM2
CSGALNACT2		FXR2		CYFIP1	PIP4K2A
CSKMT		FYCO1		FOXJ1	PKD2
CSN2		FYCO1B		LAPTM5	PKN2
CSNK2A3		G3BP1		OGN	PKP2
CSNK2B		G3BP2		PES1	PLA2G2A
CSRP2		G6PC1.1.S		PIP4K2B	PLAGL1
CSTA		G6PD		RAB15	PLAT
CTC1		GAA		RNH1	PLAU
CTDSPL2		GABPA		SORCS2	PLEK2
CTHRC1		GABRB2		TBL1X	PLEKHA5
CTNNA1		GAK		TXNRD3	PLEKHA7
CTPS		GALE		CFTR	PLGRKT
CTRL		GALK1		FADS3	PLIN2
CTSC		GALNT12		FKBP2	PLK2
CTSO		GALNT14		GABPA	PLPP1
CTTN		GALNT2		HERC4	PLPP3
CTTNBP2		GAM1		ILF2	PLPPR2
CUEDC1		GAMT		L2HGDH	PLS3
CUEDC2		GANAB		S100A3	PLXNA2
CUTC		GAPDH		TGFB2	PMAIP1
CUX2		GAPVD1		UBE2L3	PMP22
CUZD1		GAR1		CCL1	PMS1
CX3CL1		GARS1		FOXD1	PMS2P3
CXCL16		GART		GABRP	PNN
CXCL8A		GATAD2A		GPM6B	PNP
CYB561D1		GATAD2B		ISCA1	PNPLA2
CYB5A		GATC		LARP1	PNPT1
CYB5R3		GATD1		NARF	POC1A
CYBC1		GBA1		PRDX1	POC5
CYGB		GBE1		RFX4	POLA2
CYORF15A		GBF1		RPL19	POLE3
CYP11B1		GBP1		SCN1A	POLI
CYP19A1A		GCA		SNRNP70	POLR1D
CYP26B1		GCFC2		TRIAP1	POLR1F
CYP27B1		GCHFR		USPL1	POLR3B
CYP2A13		GCLC		ACBD5	POLR3H
CYP2A4		GCLM		ASIC5	POMC
CYP2A6		GCN1		CAMK1	POP1
CYP2B13		GCSH		CHD1L	POP5
CYP2B2		GDA		CIITA	POR
CYP2B7P		GDI1		ESYT2	POT1
CYP2B9		GDI2		FNTA	POTEE
CYP2C12		GEM		GLTP	POTEI
CYP2C29		GEMIN4		GXYLT1	POTEKP
CYP2C39		GEMIN5		IFNA2	POU5F1B
CYP2C50		GEMIN7		LCN2	PPARG
CYP2C7		GET1		MRPL18	PPDPF
CYP2D2		GET3		MTRR	PPFIBP1
CYP2D22		GET4		NFASC	PPIAL4G
CYP2S1		GFAP		PATL1	PPIL2
CYP3A11		GFM1		PIMREG	PPIP5K2
CYP3A13		GFM2		RAB3A	PPME1
CYP3A2		GFPT1		RIN1	PPP1CA
CYP3A59		GFUS		RTKN	PPP1R12A
CYP4A10		GGCT		SEC13	PPP1R18
CYP4A14		GGH		TUBGCP3	PPP2R3C
CYP4A31		GGH.2.L		TWF2	PPP3CC
CYP4F11		GGT2P		DKK2	PPP4R4
CYP8B1		GHDC		TRAM2	PPP6R3
CYTB		GHITM		TSLP	PPRC1
DAB2		GID8		TYRP1	PPWD1
DAF-16		GIGYF2		AKR1C3	PRDX2
DAF-2		GINS2		DCTD	PREB
DAP		GIT1		GRIK3	PRELID2
DAPK1		GJB7.S		MIR22	PRIM1
DARS1		GLA		NAE1	PRIM2
DBH-AS1		GLB1		POU2F1	PRIMPOL
DBN1		GLDC		SPR	PRKCH
DBR1		GLG1		ALOX5	PRKD1
DCAF16		GLMN		AP2B1	PRLR
DCAF6		GLO1		KCNJ5	PRMT3
DCBLD2		GLOD4		KCTD5	PRO2268
DCC		GLRA3		SLC2A4	PRORP
DCDC2		GLRB		SLC30A7	PRPF38B
DCK		GLRX		SPG7	PRPSAP2
DCP1B		GLRX3		VPS37B	PRSS23
DCPS		GLRX5		HILPDA	PRUNE1
DCUN1D2		GLS		SMAD3	PRXL2C
DCUN1D5		GLT8D1		ABHD11	PSG3
DDB2		GLTP		BHLHE41	PSIP1
DDC		GLUD1		BPNT2	PSMA2
DDIAS		GLUD1.S		CIAPIN1	PSMA4
DDIT4L		GLUL		CMTM6	PSMA7
DDX11		GLYR1		DYNLL2	PSMB3
DDX17		GMFB		ESYT1	PSMC4
DDX19B		GMFG		EVI2A	PSME3IP1
DDX20		GMPPA		MRPL17	PSRC1
DDX26B		GMPPB		NEUROD1	PTAFR
DDX39A		GMPPB.S		RSF1	PTEN
DDX5		GMPR2		SURF1	PTER
DDX52		GMPS		TNKS1BP1	PTGDS
DECR1		GNA11		CES2C	PTGER1
DEF8		GNA13		SETX	PTGS1
DEK		GNAI1		WNT7B	PTP4A1
DELE1		GNAI2		CDC42BPB	PTPN12
DENND1A		GNAI3		EXOSC4	PTPN13
DEPDC1		GNAO1		GZMBL1	PTPN3
DEPDC1B		GNAQ		NMNAT1	PTPN4
DEPDC7		GNAS		PGLS	PTPRE
DEPP1		GNAT1.L		POLE3	PTPRJ
DEPTOR		GNAT1.S		PRKAG1	PTRH1
DES		GNB1		SNX9	PTX3
DFFB		GNB1L		TNK2	PUDP
DGAT2		GNB2		GALM	PUS10
DGCR8		GNB4		GALNT7	PUS7
DGKA		GNE		NGF	PUS7L
DGKG		GNG12		SMURF2	PWP1
DGKQ		GNG2		ABCC8	PXMP4
DHCR24		GNG5		FBXO3	PYGM
DHFR2		GNL3		GFUS	RAB11B
DHRS13		GNPAT		GPR137B	RAB11FIP5
DHRS4		GNPDA1		IL23A	RAB12
DHRS7		GNPDA2		IPO9	RAB15
DHX29		GNPNAT1		ISOC1	RAB1A
DHX40		GOBP1		MPP2	RAB27B
DIMT1L		GOBP2		NHSL1	RAB28
DIO2		GOLGA2		SH3GL2	RAB31
DIP2A		GOLGA3		SMOC2	RAB3D
DKK1B		GOLGA4		THRAP3	RAB3GAP2
DKK4		GOLGA7		FOSL1	RAB3IP
DLD		GOLGB1		MAP4K1	RAB5C
DLG1		GOLIM4		NLRP12	RAB6A
DLX2		GOLM1		DPYSL4	RABEPK
DLX6		GOLM2		EEA1	RABGAP1
DMXL2		GOLPH3		EI24	RABGAP1L
DNAAF2		GOLT1B		GZMB	RAC1
DNAJA1		GOPC		H2AZ2	RAC2
DNAJB2		GORASP2		MRAS	RAD23A
DNAJB4		GOSR2		NCF4	RAD50
DNAJC12		GOT1		AARS1	RAD51
DNAJC2		GOT2		ANP32B	RAD51B
DNAJC3		GPAA1		CKLF	RAD51C
DNASE1		GPAT3		DAGLB	RAET1G
DNASE1L1		GPC1		DNMT1	RAG1AP1
DNASE1L3		GPC4		GALNT12	RALGAPA2
DNHD1		GPD1L		GCNT2	RALGAPB
DNTTIP2		GPD2		GRAMD1B	RALGPS2
DOCK10		GPHN		MAP7D1	RAN
DOCK4		GPI		NAB1	RAPGEF2
DOCK5		GPKOW		PDLIM3	RAPGEF6
DOK6		GPM6A		SAR1A	RARRES1
DOLK		GPN1		SMYD2	RARS1
DOP1A		GPNMB.L		SNRPE	RASAL2
DPH3		GPR183		TAF15	RASGRP3
DPH6		GPR89B		TBC1D5	RASL11A
DPM2		GPRC5A		TRIM25	RASSF8
DPM3		GPRC5C		TRMT1	RBBP4
DPY30		GPROP6		WDFY1	RBFOX2
DPYD		GPS1		XRN2	RBM15B
DPYSL2		GPX1		ZFYVE16	RBM23
DPYSL3		GPX4		ADAM9	RBM45
DPYSL4		GPX7		HJURP	RBMS1
DRAM1		GPX8		HPGDS	RBMX
DRAP1		GRAMD1B		PLCB3	RBPMS2
DRD1		GRAMD1C		RBM39	RCAN3
DRD2		GRB2		RBPJ	RCL1
DRD3		GRHPR		SEPTIN11	RECK
DRD4		GRIA2		SLC39A4	REV3L
DRD5		GRIK3		SNRK	RFLNA
DRG2		GRIPAP1		ABR	RFT1
DROSHA		GRN		ALG2	RFX3
DSC2		GRPEL1		CDKAL1	RFXANK
DSCC1		GRSF1		CRKL	RGCC
DSE		GRWD1		DDX18	RGS2
DSTN		GRX3		GANAB	RGS4
DTD2		GSDMD		IMPDH1	RHBDD2
DTL		GSDME		NAA15	RHBDL2
DUSP28		GSK3B		SLC10A2	RHOD
DUSP4		GSN		SPCS2	RIC1
DUSP5		GSPT1		SSRP1	RIGI
DUSP6		GSPT2		TCEAL9	RIOK3
DYDC2		GSR		TMEM33	RIOX2
DYNC1H1		GSS		TSC22D2	RLF
DYNC2I2		GST-4		TUSC3	RMDN1
DYNLL1		GST-5		HEPH	RMND5A
DYNLT2B		GSTCD		JAK1	RMND5B
DYNLT3		GSTD1		PABPN1	RNASEH2A
E2F3		GSTD3		RBL1	RND1
E2F7		GSTK1		RPS6KA2	RNF115
EAF2		GSTM1		SHANK3	RNF13
ECD		GSTM2		SNAP23	RNF144B
ECH1		GSTM3		ACTG2	RNF170
ECHDC1		GSTO1		ANTXR1	RNF180
ECHDC3		GSTP1.L		ARIH1	RNF182
ECI2		GSTT2B		CAMTA1	RNF19A
ECT2		GSTZ1		EWSR1	RNF216
EDA2R		GTF2A1		MACROH2A1	RNF217
EDAR		GTF2A2		NUDC	RNF26
EDC3		GTF2B		PITPNA	RNF6
EEF1A2		GTF2E1		PRPF8	RNFT1
EEF1AKMT1		GTF2E2		PTGFRN	RNGTT
EEF1AKMT2		GTF2F1		RPS4X	RNH1
EEF1AKMT3		GTF2F2		SLC25A24	ROCK2
EEF1B2		GTF2H3		SLTM	ROR2
EFCAB11		GTF2H4		STT3A	RP9
EFCAB7		GTF2I		TXNDC5	RPAP1
EFCAB8		GTF3C4		CCT4	RPGRIP1L
EFEMP1		GTF3C5		RNF213	RPL10
EFNA1		GTPBP1		ANKHD1	RPL10A
EFNA4		GTPBP4		BEX2	RPL14
EFNB2		GUCY2C		CD22	RPL15
EFR3A		GUCY2D		CSDE1	RPL17
EGLN3		GUK1		DCAF11	RPL18A
EGR3		GUSB		HINT3	RPL19
EGR4		GXYLT1		IGSF1	RPL23A
EHBP1		GYG1		KCNQ2	RPL27AP6
EI24		GYS1		LEPR	RPL28
EID2B		GZMH.S		NIP7	RPL29
EID3		H1-10		NXN	RPL34
EIF1		H1-2		PDCD5	RPL36
EIF2AK2		H2AC10P		PDHX	RPL36A
EIF2B2		H2AC12		PDP2	RPL37
EIF2S2		H2AZ2		PPP2R5E	RPL39L
EIF3A		H2BC11		SRR	RPL4
EIF3B		H2BC4		TIAL1	RPL5
EIF3F		H3-7		IGFBP3	RPL7
EIF4A1		H3C15		PTHLH	RPL7A
EIF4E2		H4C8		TUBB4A	RPP25
ELF3		H6PD		YY1	RPS13
ELF4		HACD3		APBB1IP	RPS2
ELK4		HACD4.L		CYP3A7	RPS27
ELL2		HACL1		DDB1	RPS28
ELMOD2		HADH		FAR1	RPS4X
ELOB		HADHA		FPGS	RPS6KA3
ELOVL1		HADHB		GOLT1B	RPS6KA5
ELOVL3		HAF-1		GTPBP4	RPS6KC1
ELOVL6		HAF-2		MCU	RPSAP15
ELP1		HAF-3		MICALL1	RPUSD3
EML2		HAF-4		MYO6	RPUSD4
ENAH		HAF-9		PCBP1	RRH
ENDOD1		HAGH		PCYT1A	RRP8
ENOSF1		HAL.2.L		RPS26	RSRC2
ENPP1		HARS1		SEPHS1	RTKN2
ENPP2		HAT1		SPAG1	RTL3
ENTPD5		HAUS5		TET2	RTN4IP1
ENTR1		HAUS8		TRIM27	RTTN
EOGT		HAX1		TRIP12	RUFY1
EPB41L1		HBA2		TWF1	RUNX2
EPB41L4A-AS1		HBG2.L		YRDC	RWDD2A
EPB41L5		HBS1L		CCL24	RXRA
EPHA2		HCCS		CHSY1	S100A3
EPHB4		HCFC1		COX6B1	S100A6
EPN3		HDAC1		DLL4	S100PBP
EPS15		HDAC10.L		ITIH5	SACM1L
EPS8		HDAC2		NCOA4	SAFB2
EPS8L2		HDAC3		RGS17	SAMD9
ERCC2		HDAC6		TDO2	SANBR
ERCC3		HDAC7		CLU	SAP18
ERCC5		HDDC2		DDIT4	SASH1
ERCC6L		HDDC3		FKBP1B	SASS6
EREG		HDGF		GMPPB	SAT1
ERG28		HDGFL2		H4C8	SAT2
ERGIC2		HDHD5		LY86	SAYSD1
ERI2		HDLBP		NF2	SCAI
ERN2		HEATR1		NFATC2	SCAPER
ERP27		HEATR3		RPIA	SCD1
ESAM		HEATR5B		RPL32	SCLY
ESM1		HEBP1		RPTOR	SCML1
ESPN		HEBP2		S100A13	SCRN3
ESR2A		HECTD1		SHISA2	SCRT1
ESR2B		HELLS		SRPK2	SCYL3
ESRP1		HELZ2		TBX2	SDHAF2
ETFB		HERC3		TMBIM1	SEC14L1
ETNPPL		HERC4		ARMCX3	SEC22A
ETS2		HEXA		CYP2C55	SECISBP2
ETV4		HEXB		DDAH2	SELE
EVA1B		HEXIM1		FBL	SELENON
EVI1		HFE		GOLM1	SELPLG
EXOC2		HGH1		GSDMD	SEMA6D
EXOC4		HGS		HKDC1	SENP7
EXOC5		HIBADH		KLC1	SEPHS2
EXOC6		HIBCH		NUP155	SERAC1
EXOC8		HIF1A		P2RY6	SERBP1
EXOSC8		HIF1AN		PITPNM1	SERPINB1
EXOSC9		HIGD1A		PSMD11	SERPINB2
EXTL2		HIGD1A.L		PTRH1	SERPINB5
F10		HIGD1A.S		RSAD2	SERPINB9
F11R		HIKESHI		SRPK1	SERTAD1
F2R		HINT1		UBE2S	SERTAD2
F2RL2		HINT2		B3GNT2	SERTAD3
F7		HINT3		BNIP3L	SESTD1
FABP5		HIP1		DCUN1D4	SF1
FABP6		HIP1R		DSTN	SF3B4
FADS3		HIRIP3		ELOVL3	SFMBT1
FAH		HK1		GBP1	SFPQ
FAHD2A		HKDC1		RCC2	SFRS16
FAM102A		HLA-A		RPL37A	SFRS6
FAM102B		HLA-B		SALL1	SGK1
FAM110B		HLA-C		SEPTIN8	SGMS1
FAM114A1		HLA-V		SLC9A3	SGO2
FAM117A		HLCS		ABHD12	SH2D4A
FAM117B		HLTF		BCAM	SHLD2
FAM120C		HM13		CDS2	SHMT1
FAM135A		HMBOX1.L		COX7A2	SHOC2
FAM13A		HMBS		CUL1	SHTN1
FAM13B		HMG20A		DHTKD1	SIGIRR
FAM13C		HMGA1		EML1	SIK1
FAM161A		HMGA2		ERMP1	SIM1
FAM162A		HMGB1		FXN	SIPA1L2
FAM171A1		HMGB2		GNB2	SIRT7
FAM174A		HMGB3		HCFC1	SIX4
FAM177A1		HMGCS1		HNRNPF	SKIC8
FAM193A		HMGN3		IL10RA	SKP2
FAM193B		HMOX2		LLGL2	SLC10A7
FAM209A		HMX2.S		NANS	SLC16A13
FAM209B		HNRNPA0		PRKCG	SLC16A3
FAM216A		HNRNPA1		TCERG1	SLC17A5
FAM222A		HNRNPA2B1		APOBEC3B	SLC25A12
FAM228B		HNRNPA3		CEL	SLC25A13
FAM3B		HNRNPAB		GCA	SLC25A20
FAM3C		HNRNPC		GLRA1	SLC25A36
FAM43A		HNRNPD		GRM5	SLC25A46
FAM53C		HNRNPDL		MRPL12	SLC26A2
FAM83D		HNRNPF		MYCL	SLC27A2
FAM98A		HNRNPH1		PLAU	SLC27A4
FAM98B		HNRNPH2		POU2F2	SLC2A10
FAN1		HNRNPH3		TPMT	SLC2A4
FANCB		HNRNPK		TSPAN13	SLC2A6
FANCG		HNRNPL		APPL2	SLC30A4
FANCI		HNRNPLL		CAPZB	SLC33A1
FANCL		HNRNPM		CYP2D22	SLC35A1
FARP1		HNRNPR		ECHDC1	SLC35A5
FARP2		HNRNPU		HIP1R	SLC35B2
FASTKD1		HNRNPUL1		IGF2BP2	SLC35D2
FASTKD2		HNRNPUL2		IL17RB	SLC35E3
FAT1		HOMER1		NPM3	SLC35F5
FBLN2		HOOK3		PIM3	SLC35G1
FBP1		HP1BP3		PMM2	SLC38A4
FBXL2		HPCA		RASGRP1	SLC38A6
FBXL21P		HPCAL1		REL	SLC38A9
FBXL6		HPCAL4		SFXN3	SLC39A1
FBXO10		HPF1		SLC23A2	SLC39A10
FBXO17		HPRT1		SNRPG	SLC39A4
FBXO2		HPS5		USP10	SLC40A1
FBXO25		HPS6		ATF7IP	SLC41A2
FBXO28		HRNR		CD34	SLC43A3
FBXO3		HS1BP3		CYP2S1	SLC46A3
FBXO30		HSBP1		EMP3	SLC4A7
FBXO31		HSC70		JARID2	SLC5A3
FBXO41		HSD17B10		MAGI1	SLC5A6
FBXO5		HSD17B11		PURA	SLC66A1L
FBXW7		HSD17B12		RIPK4	SLC6A13
FCER1G		HSD17B4		RPS13	SLC6A6
FCGR2B		HSD17B8		SMARCE1	SLC6A8
FCHSD2		HSDL1		XRCC4	SLC7A6OS
FDCSP		HSDL2		ZRANB2	SLCO3A1
FDXR		HSP70		HMGB1	SLMAP
FEM1C		HSP90AA4P		MLLT11	SLX4IP
FERMT1		HSP90AB2P		MXRA7	SMAD1
FERMT2		HSP90AB4P		PCMT1	SMAD6
FEZ2		HSP90B1		UQCRFS1	SMARCA1
FGA		HSPA12A		VGF	SMARCA2
FGB		HSPA13		CAPN6	SMARCAD1
FGD6		HSPA14		INPP1	SMARCAL1
FGF1		HSPA1B		SIRT3	SMARCB1
FGF2		HSPA1L		BAG1	SMC2
FGF3		HSPA4L		CHTF18	SMC6
FGF7		HSPA6		CSTF3	SMCO4
FGFBP3		HSPB1		CTPS2	SMIM8
FGFR1OP2		HSPB11		ENAH	SMOX
FGFR3		HSPB1.S		EPS15	SNAI1
FGFR4		HSPBP1		GHITM	SNAPIN
FGG		HSPE1-MOB4		KEAP1	SNHG12
FGL2		HSPG2		KPNA4	SNHG29
FH		HTATIP2		LIPA	SNIP1
FHIT		HTATSF1		PARVA	SNORA1
FHL1		HTRA2		ROBO2	SNORA14B
FIG4		HTT		RRAS	SNORA29
FIGN		HUS1		SELENOM	SNORA2A
FIGNL1		HUWE1		SNRPB	SNORA33
FILIP1L		HYOU1		SORBS3	SNORA3B
FIT1		HYPK		UBE4B	SNORA41
FKBP10		IARS		AVPI1	SNORA54
FKBP8		IARS2		CRY2	SNORA55
FLAD1		ICAM1		CSF2RA	SNORA5A
FLCN		IDE		GRHL1	SNORA5C
FLG		IDH1		HEBP2	SNORA6
FLNA		IDH2		HHEX	SNORA69
FLNB		IDH3A		MAPK10	SNORA74A
FLRT3		IDH3B		MIA2	SNORA75
FLT1		IDH3G		ODC1	SNORD12C
FLT4		IDI1		RBL2	SNORD13P2
FLVCR2		IER3IP1		RSL1D1	SNORD1A
FMC1		IFI30		BZW2	SNORD20
FMO1		IFI35		CDKN2A	SNORD28
FMR1		IFIT5		DDIT4L	SNORD30
FNBP1L		IFITM2		HLCS	SNORD38A
FNDC3B		IFITM3		HPD	SNORD38B
FNIP2		IFNG		LACTB	SNORD42A
FNTA		IFT27		MTAP	SNORD42B
FOXA3		IGBP1		PCBP2	SNORD43
FOXM1		IGF2BP1		STAMBPL1	SNORD45C
FOXN3		IGF2BP2		TBC1D2	SNORD4A
FOXP1		IGF2BP3		AKR1B7	SNORD4B
FPGT		IGF2R		BCL2L13	SNORD50B
FPR2		IGFBP2		CES1D	SNORD53
FRAT1		IGFBP7		DAD1	SNORD54
FRAT2		IGKV1-13		FLOT2	SNORD6
FREM1		IGSF1		GNAI3	SNORD63
FRK		IGSF8		IRAK3	SNORD73A
FRMD3		IK		KANK2	SNORD77
FRMD4B		IKBIP		NUP98	SNORD95
FRMD5		IKBKE.L		OSMR	SNORD96A
FRS2		IKBKG		PSMB3	SNRNP40
FRZB		IKZF1		TSHZ1	SNUPN
FSTL3		IL10		FOXP3	SNX13
FTCD		IL12RB2		HEN1	SNX24
FUT11		IL18		MIR193A-1	SNX25
FUT6		IL1A		MYO1C	SNX29
FUT8		IL1F10		PLEKHA2	SNX4
FXYD1		IL1R1		RDH10	SNX8
FXYD2		IL1RN		RPL30	SNX9
FXYD5		IL4		RPL7P26	SOD3
FYN		ILF2		SAP18	SOS2
FZD2		ILF3		ARHGEF7	SOWAHC
FZD4		ILK		ARL6IP5	SP100
FZD7		ILKAP		BRD4	SPAG16
G0S2		ILVBL		FEZ1	SPANXA2-OT1
G2E3		IMMT		IL7R	SPAST
G6PC		IMP3		LYPLA1	SPC24
G6PC1		IMPA1		MIR122	SPCS3
GAA		IMPA2		NAB2	SPG11
GABBR2		IMPDH1		PTPN6	SPIRE1
GABPB2		IMPDH2		RBM25	SPRED2
GABRB1		INA		SEMA3E	SPRY4
GABRB3		INCENP		SESN3	SPRYD3
GABRE		INF2		SLC12A4	SPTLC2
GAD1		INPP1		TNNI2	SPTY2D1
GADD45		INPP5K		CD274	SQOR
GAL3ST1		INSIG1.L		JPT1	SRBD1
GALK2		INTS11		LAD1	SRD5A2
GALM		INTS13		PLCD1	SRGAP2
GALNT1		INTS14		PLOD3	SRI
GALNT10		INTS3		PTBP3	SRPK2
[truncated: 7,891 more rows]
