# Supplementary material for: Pharmacogenomic Landscape of Ivermectin and Selective Antioxidants: Exploring Gene Interplay in the Context of Long COVID
Source: MDPI journal article supplement (doi:10.3390/ijms242015471), 2023-10-23
Supplement: s1 [file Table S2.xlsx]

## Sheet: CTD_analyzer_go_20220826142139
Table S2. Gene Set Analyzer: Enriched GO terms from 12 genes(Threshold: corrected p value < 0.01, with all ontology)
Ontology	Highest GO Level	GO Term Name	GO Term ID	P-value	Corrected P-value	Annotated Genes Quantity	Annotated Genes	Genome Frequency
Biological Process	3	cellular response to chemical stimulus	GO:0070887	5.24e-15	1.6e-11	12	BAX|BCL2|CASP3|CAT|CDH1|CTNNB1|GSR|IL1B|IL6|NOS2|PARP1|TNF	2895/44767 genes: 6.47%
Biological Process	3	response to xenobiotic stimulus	GO:0009410	2.74e-14	8.37e-11	8	BCL2|CASP3|CAT|CDH1|CTNNB1|IL1B|NOS2|TNF	421/44767 genes: 0.94%
Biological Process	4	cellular response to organic substance	GO:0071310	6.88e-14	2.1e-10	11	BAX|BCL2|CASP3|CAT|CDH1|CTNNB1|IL1B|IL6|NOS2|PARP1|TNF	2286/44767 genes: 5.11%
Biological Process	4	response to lipid	GO:0033993	8.09e-14	2.47e-10	9	BCL2|CASP3|CAT|CTNNB1|IL1B|IL6|NOS2|PARP1|TNF	872/44767 genes: 1.95%
Biological Process	4	regulation of programmed cell death	GO:0043067	8.21e-14	2.51e-10	10	BAX|BCL2|CASP3|CAT|CTNNB1|IL1B|IL6|NOS2|PARP1|TNF	1460/44767 genes: 3.26%
Biological Process	4	response to organic cyclic compound	GO:0014070	9.43e-14	2.88e-10	9	BCL2|CASP3|CAT|CDH1|CTNNB1|IL1B|IL6|PARP1|TNF	887/44767 genes: 1.98%
Biological Process	3	regulation of cellular localization	GO:0060341	9.62e-14	2.94e-10	9	BAX|BCL2|CDH1|CTNNB1|IL1B|IL6|NOS2|PARP1|TNF	889/44767 genes: 1.99%
Biological Process	3	response to oxygen-containing compound	GO:1901700	1.96e-13	5.97e-10	10	BCL2|CASP3|CAT|CDH1|CTNNB1|IL1B|IL6|NOS2|PARP1|TNF	1593/44767 genes: 3.56%
Biological Process	3	regulation of cell death	GO:0010941	2.2e-13	6.72e-10	10	BAX|BCL2|CASP3|CAT|CTNNB1|IL1B|IL6|NOS2|PARP1|TNF	1612/44767 genes: 3.60%
Biological Process	2	response to external stimulus	GO:0009605	2.36e-13	7.21e-10	11	BAX|BCL2|CASP3|CAT|CDH1|CTNNB1|IL1B|IL6|NOS2|PARP1|TNF	2558/44767 genes: 5.71%
Biological Process	2	response to chemical	GO:0042221	4.24e-13	1.29e-09	12	BAX|BCL2|CASP3|CAT|CDH1|CTNNB1|GSR|IL1B|IL6|NOS2|PARP1|TNF	4173/44767 genes: 9.32%
Biological Process	2	response to abiotic stimulus	GO:0009628	6.67e-13	2.04e-09	9	BAX|BCL2|CASP3|CAT|CTNNB1|IL1B|NOS2|PARP1|TNF	1103/44767 genes: 2.46%
Biological Process	3	response to organic substance	GO:0010033	9.64e-13	2.94e-09	11	BAX|BCL2|CASP3|CAT|CDH1|CTNNB1|IL1B|IL6|NOS2|PARP1|TNF	2908/44767 genes: 6.50%
Biological Process	4	cellular response to chemical stress	GO:0062197	9.87e-13	3.01e-09	7	BCL2|CASP3|CAT|CTNNB1|IL6|PARP1|TNF	337/44767 genes: 0.75%
Biological Process	3	programmed cell death	GO:0012501	1.26e-12	3.83e-09	10	BAX|BCL2|CASP3|CAT|CTNNB1|IL1B|IL6|NOS2|PARP1|TNF	1920/44767 genes: 4.29%
Biological Process	2	cell death	GO:0008219	2.77e-12	8.45e-09	10	BAX|BCL2|CASP3|CAT|CTNNB1|IL1B|IL6|NOS2|PARP1|TNF	2079/44767 genes: 4.64%
Biological Process	2	response to other organism	GO:0051707	3.61e-12	1.1e-08	9	BAX|BCL2|CASP3|CDH1|IL1B|IL6|NOS2|PARP1|TNF	1332/44767 genes: 2.98%
Biological Process	3	response to external biotic stimulus	GO:0043207	3.69e-12	1.12e-08	9	BAX|BCL2|CASP3|CDH1|IL1B|IL6|NOS2|PARP1|TNF	1335/44767 genes: 2.98%
Biological Process	4	regulation of protein localization	GO:0032880	3.93e-12	1.2e-08	8	BCL2|CDH1|CTNNB1|IL1B|IL6|NOS2|PARP1|TNF	783/44767 genes: 1.75%
Biological Process	2	regulation of immune system process	GO:0002682	4.74e-12	1.45e-08	9	BAX|BCL2|CASP3|CTNNB1|IL1B|IL6|NOS2|PARP1|TNF	1373/44767 genes: 3.07%
Biological Process	3	response to oxidative stress	GO:0006979	4.79e-12	1.46e-08	7	BCL2|CASP3|CAT|CTNNB1|IL6|PARP1|TNF	422/44767 genes: 0.94%
Biological Process	2	response to biotic stimulus	GO:0009607	4.86e-12	1.48e-08	9	BAX|BCL2|CASP3|CDH1|IL1B|IL6|NOS2|PARP1|TNF	1377/44767 genes: 3.08%
Biological Process	2	catabolic process	GO:0009056	6.2e-12	1.89e-08	10	BAX|BCL2|CASP3|CAT|CDH1|CTNNB1|IL1B|IL6|NOS2|TNF	2255/44767 genes: 5.04%
Biological Process	5	regulation of apoptotic process	GO:0042981	6.56e-12	2e-08	9	BAX|BCL2|CASP3|CAT|CTNNB1|IL1B|IL6|PARP1|TNF	1424/44767 genes: 3.18%
Biological Process	5	negative regulation of apoptotic process	GO:0043066	9.36e-12	2.86e-08	8	BAX|BCL2|CASP3|CAT|CTNNB1|IL1B|IL6|TNF	873/44767 genes: 1.95%
Biological Process	5	regulation of neuron apoptotic process	GO:0043523	9.75e-12	2.98e-08	6	BAX|BCL2|CASP3|CTNNB1|PARP1|TNF	213/44767 genes: 0.48%
Biological Process	1	biological process involved in interspecies interaction between organisms	GO:0044419	1.1e-11	3.34e-08	9	BAX|BCL2|CASP3|CDH1|IL1B|IL6|NOS2|PARP1|TNF	1508/44767 genes: 3.37%
Biological Process	4	negative regulation of programmed cell death	GO:0043069	1.17e-11	3.58e-08	8	BAX|BCL2|CASP3|CAT|CTNNB1|IL1B|IL6|TNF	898/44767 genes: 2.01%
Biological Process	2	response to endogenous stimulus	GO:0009719	1.28e-11	3.89e-08	9	BCL2|CASP3|CAT|CDH1|CTNNB1|IL1B|IL6|PARP1|TNF	1534/44767 genes: 3.43%
Biological Process	3	regulation of catabolic process	GO:0009894	1.29e-11	3.94e-08	8	BAX|BCL2|CASP3|CDH1|IL1B|IL6|NOS2|TNF	909/44767 genes: 2.03%
Biological Process	3	response to toxic substance	GO:0009636	1.47e-11	4.49e-08	6	BAX|BCL2|CAT|CDH1|GSR|TNF	228/44767 genes: 0.51%
Biological Process	4	central nervous system development	GO:0007417	1.8e-11	5.5e-08	8	BAX|BCL2|CASP3|CDH1|CTNNB1|IL1B|IL6|TNF	948/44767 genes: 2.12%
Biological Process	4	response to organonitrogen compound	GO:0010243	2.2e-11	6.71e-08	8	CASP3|CAT|CDH1|CTNNB1|IL1B|IL6|PARP1|TNF	972/44767 genes: 2.17%
Biological Process	4	positive regulation of programmed cell death	GO:0043068	2.36e-11	7.19e-08	7	BAX|CASP3|CTNNB1|IL6|NOS2|PARP1|TNF	530/44767 genes: 1.18%
Biological Process	4	neuron apoptotic process	GO:0051402	2.39e-11	7.28e-08	6	BAX|BCL2|CASP3|CTNNB1|PARP1|TNF	247/44767 genes: 0.55%
Biological Process	4	positive regulation of neuron death	GO:1901216	2.43e-11	7.42e-08	5	BAX|CASP3|CTNNB1|PARP1|TNF	91/44767 genes: 0.20%
Biological Process	3	negative regulation of cell death	GO:0060548	2.69e-11	8.21e-08	8	BAX|BCL2|CASP3|CAT|CTNNB1|IL1B|IL6|TNF	997/44767 genes: 2.23%
Biological Process	3	response to nitrogen compound	GO:1901698	3.82e-11	1.17e-07	8	CASP3|CAT|CDH1|CTNNB1|IL1B|IL6|PARP1|TNF	1042/44767 genes: 2.33%
Biological Process	3	apoptotic signaling pathway	GO:0097190	4.02e-11	1.23e-07	7	BAX|BCL2|CASP3|CTNNB1|IL1B|PARP1|TNF	572/44767 genes: 1.28%
Biological Process	4	lymphocyte proliferation	GO:0046651	4.08e-11	1.25e-07	6	BAX|BCL2|CASP3|CTNNB1|IL1B|IL6	270/44767 genes: 0.60%
Biological Process	4	mononuclear cell proliferation	GO:0032943	4.76e-11	1.45e-07	6	BAX|BCL2|CASP3|CTNNB1|IL1B|IL6	277/44767 genes: 0.62%
Biological Process	4	cellular response to oxidative stress	GO:0034599	4.87e-11	1.48e-07	6	BCL2|CAT|CTNNB1|IL6|PARP1|TNF	278/44767 genes: 0.62%
Biological Process	3	positive regulation of cell death	GO:0010942	5.35e-11	1.63e-07	7	BAX|CASP3|CTNNB1|IL6|NOS2|PARP1|TNF	596/44767 genes: 1.33%
Biological Process	3	cellular response to stress	GO:0033554	5.83e-11	1.78e-07	9	BAX|BCL2|CASP3|CAT|CTNNB1|IL1B|IL6|PARP1|TNF	1819/44767 genes: 4.06%
Biological Process	3	cellular catabolic process	GO:0044248	6.46e-11	1.97e-07	9	BAX|BCL2|CASP3|CAT|CTNNB1|IL1B|IL6|NOS2|TNF	1840/44767 genes: 4.11%
Biological Process	3	tube development	GO:0035295	7.17e-11	2.19e-07	8	BAX|BCL2|CASP3|CAT|CTNNB1|IL1B|IL6|TNF	1128/44767 genes: 2.52%
Biological Process	4	apoptotic process	GO:0006915	7.21e-11	2.2e-07	9	BAX|BCL2|CASP3|CAT|CTNNB1|IL1B|IL6|PARP1|TNF	1863/44767 genes: 4.16%
Biological Process	3	tissue development	GO:0009888	7.49e-11	2.29e-07	9	BAX|BCL2|CASP3|CAT|CTNNB1|IL1B|IL6|PARP1|TNF	1871/44767 genes: 4.18%
Biological Process	4	cellular response to oxygen-containing compound	GO:1901701	7.59e-11	2.32e-07	8	CAT|CDH1|CTNNB1|IL1B|IL6|NOS2|PARP1|TNF	1136/44767 genes: 2.54%
Biological Process	3	leukocyte proliferation	GO:0070661	1.01e-10	3.09e-07	6	BAX|BCL2|CASP3|CTNNB1|IL1B|IL6	314/44767 genes: 0.70%
Biological Process	4	regulation of neuron death	GO:1901214	1.11e-10	3.4e-07	6	BAX|BCL2|CASP3|CTNNB1|PARP1|TNF	319/44767 genes: 0.71%
Biological Process	4	macromolecule catabolic process	GO:0009057	1.14e-10	3.48e-07	8	BAX|CASP3|CDH1|CTNNB1|IL1B|IL6|NOS2|TNF	1196/44767 genes: 2.67%
Biological Process	2	regulation of localization	GO:0032879	1.18e-10	3.59e-07	9	BAX|BCL2|CDH1|CTNNB1|IL1B|IL6|NOS2|PARP1|TNF	1968/44767 genes: 4.40%
Biological Process	4	negative regulation of neurogenesis	GO:0050768	1.22e-10	3.72e-07	5	CDH1|CTNNB1|IL1B|IL6|TNF	125/44767 genes: 0.28%
Biological Process	3	negative regulation of nervous system development	GO:0051961	1.49e-10	4.54e-07	5	CDH1|CTNNB1|IL1B|IL6|TNF	130/44767 genes: 0.29%
Biological Process	2	cellular response to stimulus	GO:0051716	1.6e-10	4.88e-07	12	BAX|BCL2|CASP3|CAT|CDH1|CTNNB1|GSR|IL1B|IL6|NOS2|PARP1|TNF	6838/44767 genes: 15.27%
Biological Process	3	regulation of cell communication	GO:0010646	1.77e-10	5.4e-07	10	BAX|BCL2|CAT|CDH1|CTNNB1|IL1B|IL6|NOS2|PARP1|TNF	3163/44767 genes: 7.07%
Biological Process	2	regulation of signaling	GO:0023051	1.84e-10	5.62e-07	10	BAX|BCL2|CAT|CDH1|CTNNB1|IL1B|IL6|NOS2|PARP1|TNF	3176/44767 genes: 7.09%
Biological Process	5	epithelial cell apoptotic process	GO:1904019	1.94e-10	5.92e-07	5	BAX|BCL2|CASP3|IL6|TNF	137/44767 genes: 0.31%
Biological Process	4	regulation of apoptotic signaling pathway	GO:2001233	2.15e-10	6.57e-07	6	BAX|BCL2|CTNNB1|IL1B|PARP1|TNF	356/44767 genes: 0.80%
Biological Process	3	neuron death	GO:0070997	2.26e-10	6.91e-07	6	BAX|BCL2|CASP3|CTNNB1|PARP1|TNF	359/44767 genes: 0.80%
Biological Process	4	protein localization	GO:0008104	2.35e-10	7.18e-07	9	BAX|BCL2|CDH1|CTNNB1|IL1B|IL6|NOS2|PARP1|TNF	2128/44767 genes: 4.75%
Biological Process	3	regulation of cellular metabolic process	GO:0031323	2.39e-10	7.28e-07	11	BAX|BCL2|CASP3|CAT|CDH1|CTNNB1|IL1B|IL6|NOS2|PARP1|TNF	4815/44767 genes: 10.76%
Biological Process	3	cellular macromolecule localization	GO:0070727	2.45e-10	7.49e-07	9	BAX|BCL2|CDH1|CTNNB1|IL1B|IL6|NOS2|PARP1|TNF	2138/44767 genes: 4.78%
Biological Process	3	regulation of nitrogen compound metabolic process	GO:0051171	2.68e-10	8.17e-07	11	BAX|BCL2|CASP3|CAT|CDH1|CTNNB1|IL1B|IL6|NOS2|PARP1|TNF	4866/44767 genes: 10.87%
Biological Process	3	animal organ development	GO:0048513	2.8e-10	8.53e-07	10	BAX|BCL2|CASP3|CAT|CDH1|CTNNB1|IL1B|IL6|PARP1|TNF	3313/44767 genes: 7.40%
Biological Process	5	response to UV	GO:0009411	2.87e-10	8.75e-07	5	BAX|BCL2|CASP3|CAT|PARP1	148/44767 genes: 0.33%
Biological Process	3	positive regulation of macromolecule metabolic process	GO:0010604	2.97e-10	9.05e-07	10	BAX|BCL2|CASP3|CDH1|CTNNB1|IL1B|IL6|NOS2|PARP1|TNF	3333/44767 genes: 7.45%
Biological Process	3	protein metabolic process	GO:0019538	3.04e-10	9.27e-07	11	BAX|BCL2|CASP3|CAT|CDH1|CTNNB1|IL1B|IL6|NOS2|PARP1|TNF	4923/44767 genes: 11.00%
Biological Process	2	regulation of biological quality	GO:0065008	3.14e-10	9.57e-07	10	BAX|BCL2|CASP3|CDH1|CTNNB1|IL1B|IL6|NOS2|PARP1|TNF	3352/44767 genes: 7.49%
Biological Process	3	negative regulation of cell population proliferation	GO:0008285	3.21e-10	9.81e-07	7	BAX|BCL2|CASP3|CTNNB1|IL1B|IL6|TNF	771/44767 genes: 1.72%
Biological Process	3	regulation of primary metabolic process	GO:0080090	3.83e-10	1.17e-06	11	BAX|BCL2|CASP3|CAT|CDH1|CTNNB1|IL1B|IL6|NOS2|PARP1|TNF	5029/44767 genes: 11.23%
Biological Process	5	response to corticosteroid	GO:0031960	3.86e-10	1.18e-06	5	BCL2|CASP3|IL6|PARP1|TNF	157/44767 genes: 0.35%
Biological Process	3	positive regulation of molecular function	GO:0044093	4.02e-10	1.23e-06	8	BAX|BCL2|CAT|CTNNB1|IL1B|IL6|PARP1|TNF	1402/44767 genes: 3.13%
Biological Process	3	response to hormone	GO:0009725	4.15e-10	1.27e-06	7	BCL2|CASP3|CAT|IL1B|IL6|PARP1|TNF	800/44767 genes: 1.79%
Biological Process	4	negative regulation of cell development	GO:0010721	4.81e-10	1.47e-06	5	CDH1|CTNNB1|IL1B|IL6|TNF	164/44767 genes: 0.37%
Biological Process	3	cell-cell adhesion	GO:0098609	5.36e-10	1.64e-06	7	BCL2|CASP3|CDH1|CTNNB1|IL1B|IL6|TNF	830/44767 genes: 1.85%
Biological Process	2	positive regulation of cellular process	GO:0048522	5.79e-10	1.77e-06	11	BAX|BCL2|CASP3|CAT|CDH1|CTNNB1|IL1B|IL6|NOS2|PARP1|TNF	5223/44767 genes: 11.67%
Biological Process	3	intracellular signal transduction	GO:0035556	5.9e-10	1.8e-06	9	BAX|BCL2|CASP3|CAT|CTNNB1|IL1B|IL6|PARP1|TNF	2360/44767 genes: 5.27%
Biological Process	4	neurogenesis	GO:0022008	6.29e-10	1.92e-06	8	BAX|BCL2|CASP3|CDH1|CTNNB1|IL1B|IL6|TNF	1484/44767 genes: 3.31%
Biological Process	4	gland development	GO:0048732	6.31e-10	1.93e-06	6	BAX|BCL2|CDH1|CTNNB1|IL6|TNF	426/44767 genes: 0.95%
Biological Process	2	positive regulation of metabolic process	GO:0009893	6.9e-10	2.11e-06	10	BAX|BCL2|CASP3|CDH1|CTNNB1|IL1B|IL6|NOS2|PARP1|TNF	3631/44767 genes: 8.11%
Biological Process	2	response to stress	GO:0006950	7.19e-10	2.19e-06	10	BAX|BCL2|CASP3|CAT|CTNNB1|IL1B|IL6|NOS2|PARP1|TNF	3646/44767 genes: 8.14%
Biological Process	4	hemopoiesis	GO:0030097	7.44e-10	2.27e-06	7	BAX|BCL2|CASP3|CTNNB1|IL6|PARP1|TNF	870/44767 genes: 1.94%
Biological Process	3	response to radiation	GO:0009314	7.66e-10	2.34e-06	6	BAX|BCL2|CASP3|CAT|PARP1|TNF	440/44767 genes: 0.98%
Biological Process	4	regulation of protein metabolic process	GO:0051246	8.16e-10	2.49e-06	9	BAX|BCL2|CASP3|CDH1|CTNNB1|IL1B|IL6|NOS2|TNF	2448/44767 genes: 5.47%
Biological Process	2	leukocyte activation	GO:0045321	8.57e-10	2.62e-06	7	BAX|BCL2|CASP3|CTNNB1|IL1B|IL6|TNF	888/44767 genes: 1.98%
Biological Process	3	homeostatic process	GO:0042592	8.87e-10	2.71e-06	8	BAX|BCL2|CASP3|CTNNB1|IL1B|IL6|NOS2|TNF	1550/44767 genes: 3.46%
Biological Process	1	negative regulation of biological process	GO:0048519	9.35e-10	2.85e-06	11	BAX|BCL2|CASP3|CAT|CDH1|CTNNB1|IL1B|IL6|NOS2|PARP1|TNF	5458/44767 genes: 12.19%
Biological Process	4	regulation of cell development	GO:0060284	9.48e-10	2.89e-06	6	BCL2|CDH1|CTNNB1|IL1B|IL6|TNF	456/44767 genes: 1.02%
Biological Process	5	positive regulation of neuron apoptotic process	GO:0043525	1e-09	3.06e-06	4	BAX|CASP3|CTNNB1|TNF	55/44767 genes: 0.12%
Biological Process	3	hematopoietic or lymphoid organ development	GO:0048534	1.04e-09	3.17e-06	7	BAX|BCL2|CASP3|CTNNB1|IL6|PARP1|TNF	913/44767 genes: 2.04%
Biological Process	3	tube morphogenesis	GO:0035239	1.06e-09	3.22e-06	7	BAX|BCL2|CASP3|CTNNB1|IL1B|IL6|TNF	915/44767 genes: 2.04%
Biological Process	4	regulation of intracellular signal transduction	GO:1902531	1.15e-09	3.51e-06	8	BAX|BCL2|CAT|CTNNB1|IL1B|IL6|PARP1|TNF	1602/44767 genes: 3.58%
Biological Process	2	macromolecule localization	GO:0033036	1.24e-09	3.78e-06	9	BAX|BCL2|CDH1|CTNNB1|IL1B|IL6|NOS2|PARP1|TNF	2566/44767 genes: 5.73%
Biological Process	5	T cell proliferation	GO:0042098	1.24e-09	3.79e-06	5	BAX|CASP3|CTNNB1|IL1B|IL6	198/44767 genes: 0.44%
Biological Process	3	regulation of transport	GO:0051049	1.47e-09	4.47e-06	8	BAX|BCL2|CDH1|CTNNB1|IL1B|IL6|NOS2|TNF	1652/44767 genes: 3.69%
Biological Process	2	immune system development	GO:0002520	1.55e-09	4.72e-06	7	BAX|BCL2|CASP3|CTNNB1|IL6|PARP1|TNF	967/44767 genes: 2.16%
Biological Process	2	multicellular organismal homeostasis	GO:0048871	1.59e-09	4.84e-06	6	BAX|BCL2|CTNNB1|IL1B|IL6|TNF	497/44767 genes: 1.11%
Biological Process	1	immune system process	GO:0002376	1.72e-09	5.26e-06	9	BAX|BCL2|CASP3|CTNNB1|IL1B|IL6|NOS2|PARP1|TNF	2664/44767 genes: 5.95%
Biological Process	4	T cell activation	GO:0042110	1.72e-09	5.26e-06	6	BAX|BCL2|CASP3|CTNNB1|IL1B|IL6	504/44767 genes: 1.13%
Biological Process	4	positive regulation of interleukin-8 production	GO:0032757	1.75e-09	5.33e-06	4	IL1B|IL6|NOS2|TNF	63/44767 genes: 0.14%
Biological Process	3	regulation of macromolecule metabolic process	GO:0060255	1.77e-09	5.41e-06	11	BAX|BCL2|CASP3|CAT|CDH1|CTNNB1|IL1B|IL6|NOS2|PARP1|TNF	5789/44767 genes: 12.93%
Biological Process	3	regulation of cell population proliferation	GO:0042127	1.91e-09	5.82e-06	8	BAX|BCL2|CASP3|CTNNB1|IL1B|IL6|NOS2|TNF	1708/44767 genes: 3.82%
Biological Process	1	signaling	GO:0023052	2e-09	6.11e-06	11	BAX|BCL2|CASP3|CAT|CDH1|CTNNB1|IL1B|IL6|NOS2|PARP1|TNF	5854/44767 genes: 13.08%
Biological Process	1	positive regulation of biological process	GO:0048518	2.1e-09	6.41e-06	11	BAX|BCL2|CASP3|CAT|CDH1|CTNNB1|IL1B|IL6|NOS2|PARP1|TNF	5880/44767 genes: 13.13%
Biological Process	3	organonitrogen compound metabolic process	GO:1901564	2.13e-09	6.5e-06	11	BAX|BCL2|CASP3|CAT|CDH1|CTNNB1|IL1B|IL6|NOS2|PARP1|TNF	5887/44767 genes: 13.15%
Biological Process	1	response to stimulus	GO:0050896	2.15e-09	6.55e-06	12	BAX|BCL2|CASP3|CAT|CDH1|CTNNB1|GSR|IL1B|IL6|NOS2|PARP1|TNF	8489/44767 genes: 18.96%
Biological Process	4	negative regulation of apoptotic signaling pathway	GO:2001234	2.16e-09	6.58e-06	5	BAX|BCL2|CTNNB1|IL1B|TNF	221/44767 genes: 0.49%
Biological Process	5	regulation of lymphocyte proliferation	GO:0050670	2.16e-09	6.58e-06	5	BCL2|CASP3|CTNNB1|IL1B|IL6	221/44767 genes: 0.49%
Biological Process	3	response to inorganic substance	GO:0010035	2.18e-09	6.64e-06	6	BCL2|CASP3|CAT|CDH1|IL6|PARP1	524/44767 genes: 1.17%
Biological Process	2	cell activation	GO:0001775	2.18e-09	6.65e-06	7	BAX|BCL2|CASP3|CTNNB1|IL1B|IL6|TNF	1016/44767 genes: 2.27%
Biological Process	3	system development	GO:0048731	2.21e-09	6.73e-06	10	BAX|BCL2|CASP3|CAT|CDH1|CTNNB1|IL1B|IL6|PARP1|TNF	4086/44767 genes: 9.13%
Biological Process	2	cell communication	GO:0007154	2.25e-09	6.85e-06	11	BAX|BCL2|CASP3|CAT|CDH1|CTNNB1|IL1B|IL6|NOS2|PARP1|TNF	5916/44767 genes: 13.22%
Biological Process	5	regulation of mononuclear cell proliferation	GO:0032944	2.36e-09	7.2e-06	5	BCL2|CASP3|CTNNB1|IL1B|IL6	225/44767 genes: 0.50%
Biological Process	2	regulation of molecular function	GO:0065009	3.04e-09	9.29e-06	9	BAX|BCL2|CASP3|CAT|CTNNB1|IL1B|IL6|PARP1|TNF	2841/44767 genes: 6.35%
Biological Process	5	cellular response to organic cyclic compound	GO:0071407	3.17e-09	9.66e-06	6	CASP3|CDH1|CTNNB1|IL1B|PARP1|TNF	558/44767 genes: 1.25%
Biological Process	4	leukocyte differentiation	GO:0002521	3.23e-09	9.87e-06	6	BAX|BCL2|CTNNB1|IL6|PARP1|TNF	560/44767 genes: 1.25%
Biological Process	3	regulation of leukocyte activation	GO:0002694	3.45e-09	1.05e-05	6	BCL2|CASP3|CTNNB1|IL1B|IL6|TNF	566/44767 genes: 1.26%
Biological Process	3	positive regulation of cellular metabolic process	GO:0031325	3.52e-09	1.07e-05	9	BAX|BCL2|CASP3|CDH1|CTNNB1|IL1B|IL6|PARP1|TNF	2888/44767 genes: 6.45%
Biological Process	3	organic substance catabolic process	GO:1901575	3.53e-09	1.08e-05	8	BAX|CASP3|CDH1|CTNNB1|IL1B|IL6|NOS2|TNF	1847/44767 genes: 4.13%
Biological Process	4	response to alcohol	GO:0097305	3.92e-09	1.2e-05	5	CAT|CDH1|CTNNB1|PARP1|TNF	249/44767 genes: 0.56%
Biological Process	2	cellular metabolic process	GO:0044237	4.04e-09	1.23e-05	12	BAX|BCL2|CASP3|CAT|CDH1|CTNNB1|GSR|IL1B|IL6|NOS2|PARP1|TNF	8947/44767 genes: 19.99%
Biological Process	4	regulation of leukocyte proliferation	GO:0070663	4.17e-09	1.27e-05	5	BCL2|CASP3|CTNNB1|IL1B|IL6	252/44767 genes: 0.56%
Biological Process	2	cellular localization	GO:0051641	4.23e-09	1.29e-05	9	BAX|BCL2|CDH1|CTNNB1|IL1B|IL6|NOS2|PARP1|TNF	2949/44767 genes: 6.59%
Biological Process	3	positive regulation of nitrogen compound metabolic process	GO:0051173	4.24e-09	1.3e-05	9	BAX|BCL2|CASP3|CDH1|CTNNB1|IL1B|IL6|PARP1|TNF	2950/44767 genes: 6.59%
Biological Process	2	regulation of metabolic process	GO:0019222	4.33e-09	1.32e-05	11	BAX|BCL2|CASP3|CAT|CDH1|CTNNB1|IL1B|IL6|NOS2|PARP1|TNF	6284/44767 genes: 14.04%
Biological Process	4	positive regulation of DNA-binding transcription factor activity	GO:0051091	4.33e-09	1.32e-05	5	CAT|CTNNB1|IL1B|IL6|TNF	254/44767 genes: 0.57%
Biological Process	4	epithelium development	GO:0060429	4.63e-09	1.41e-05	7	BAX|BCL2|CASP3|CAT|CTNNB1|IL1B|TNF	1133/44767 genes: 2.53%
Biological Process	3	cell development	GO:0048468	4.71e-09	1.44e-05	8	BAX|BCL2|CASP3|CDH1|CTNNB1|IL1B|IL6|TNF	1916/44767 genes: 4.28%
Biological Process	4	cellular response to organonitrogen compound	GO:0071417	5.54e-09	1.69e-05	6	CASP3|CDH1|CTNNB1|IL1B|PARP1|TNF	613/44767 genes: 1.37%
Biological Process	3	regulation of cell activation	GO:0050865	5.99e-09	1.83e-05	6	BCL2|CASP3|CTNNB1|IL1B|IL6|TNF	621/44767 genes: 1.39%
Biological Process	2	multicellular organism development	GO:0007275	6.03e-09	1.84e-05	10	BAX|BCL2|CASP3|CAT|CDH1|CTNNB1|IL1B|IL6|PARP1|TNF	4527/44767 genes: 10.11%
Biological Process	2	negative regulation of cellular process	GO:0048523	6.14e-09	1.87e-05	10	BAX|BCL2|CASP3|CAT|CDH1|CTNNB1|IL1B|IL6|PARP1|TNF	4535/44767 genes: 10.13%
Biological Process	2	cell population proliferation	GO:0008283	6.24e-09	1.9e-05	8	BAX|BCL2|CASP3|CTNNB1|IL1B|IL6|NOS2|TNF	1986/44767 genes: 4.44%
Biological Process	3	response to bacterium	GO:0009617	6.77e-09	2.07e-05	6	CASP3|CDH1|IL1B|IL6|NOS2|TNF	634/44767 genes: 1.42%
Biological Process	2	positive regulation of response to stimulus	GO:0048584	6.89e-09	2.1e-05	8	BAX|BCL2|CAT|CTNNB1|IL1B|IL6|PARP1|TNF	2011/44767 genes: 4.49%
Biological Process	4	positive regulation of cell development	GO:0010720	7.06e-09	2.15e-05	5	BCL2|CTNNB1|IL1B|IL6|TNF	280/44767 genes: 0.63%
Biological Process	4	intrinsic apoptotic signaling pathway	GO:0097193	7.71e-09	2.35e-05	5	BAX|BCL2|CASP3|PARP1|TNF	285/44767 genes: 0.64%
Biological Process	3	response to hypoxia	GO:0001666	8.12e-09	2.48e-05	5	BCL2|CASP3|CAT|NOS2|TNF	288/44767 genes: 0.64%
Biological Process	4	positive regulation of DNA metabolic process	GO:0051054	8.85e-09	2.7e-05	5	BAX|CTNNB1|IL6|PARP1|TNF	293/44767 genes: 0.65%
Biological Process	4	cellular response to nitrogen compound	GO:1901699	9.16e-09	2.79e-05	6	CASP3|CDH1|CTNNB1|IL1B|PARP1|TNF	667/44767 genes: 1.49%
Biological Process	2	leukocyte homeostasis	GO:0001776	9.7e-09	2.96e-05	4	BAX|BCL2|CASP3|IL6	96/44767 genes: 0.21%
Biological Process	3	negative regulation of cellular metabolic process	GO:0031324	9.93e-09	3.03e-05	8	BAX|BCL2|CASP3|CTNNB1|IL1B|IL6|PARP1|TNF	2107/44767 genes: 4.71%
Biological Process	4	protein modification process	GO:0036211	1e-08	3.06e-05	9	BAX|BCL2|CASP3|CTNNB1|IL1B|IL6|NOS2|PARP1|TNF	3252/44767 genes: 7.26%
Biological Process	4	response to decreased oxygen levels	GO:0036293	1.01e-08	3.09e-05	5	BCL2|CASP3|CAT|NOS2|TNF	301/44767 genes: 0.67%
Biological Process	2	negative regulation of metabolic process	GO:0009892	1.04e-08	3.18e-05	9	BAX|BCL2|CASP3|CTNNB1|IL1B|IL6|NOS2|PARP1|TNF	3266/44767 genes: 7.30%
Biological Process	5	regulation of phosphate metabolic process	GO:0019220	1.05e-08	3.19e-05	7	BAX|BCL2|CASP3|IL1B|IL6|PARP1|TNF	1275/44767 genes: 2.85%
Biological Process	4	regulation of phosphorus metabolic process	GO:0051174	1.05e-08	3.21e-05	7	BAX|BCL2|CASP3|IL1B|IL6|PARP1|TNF	1276/44767 genes: 2.85%
Biological Process	3	cell death in response to oxidative stress	GO:0036473	1.05e-08	3.22e-05	4	BCL2|CTNNB1|PARP1|TNF	98/44767 genes: 0.22%
Biological Process	4	positive regulation of interleukin-6 production	GO:0032755	1.05e-08	3.22e-05	4	IL1B|IL6|NOS2|TNF	98/44767 genes: 0.22%
Biological Process	4	response to lipopolysaccharide	GO:0032496	1.1e-08	3.36e-05	5	CASP3|IL1B|IL6|NOS2|TNF	306/44767 genes: 0.68%
Biological Process	3	regulation of cellular response to stress	GO:0080135	1.18e-08	3.6e-05	6	BAX|BCL2|CTNNB1|IL1B|PARP1|TNF	696/44767 genes: 1.55%
Biological Process	4	response to light stimulus	GO:0009416	1.19e-08	3.64e-05	5	BAX|BCL2|CASP3|CAT|PARP1	311/44767 genes: 0.69%
Biological Process	5	positive regulation of neuroinflammatory response	GO:0150078	1.2e-08	3.65e-05	3	IL1B|IL6|TNF	18/44767 genes: 0.04%
Biological Process	3	interleukin-8 production	GO:0032637	1.29e-08	3.93e-05	4	IL1B|IL6|NOS2|TNF	103/44767 genes: 0.23%
Biological Process	4	regulation of interleukin-8 production	GO:0032677	1.29e-08	3.93e-05	4	IL1B|IL6|NOS2|TNF	103/44767 genes: 0.23%
Biological Process	3	regulation of cellular component organization	GO:0051128	1.4e-08	4.26e-05	8	BAX|BCL2|CDH1|CTNNB1|IL1B|IL6|PARP1|TNF	2201/44767 genes: 4.92%
Biological Process	4	regulation of cellular catabolic process	GO:0031329	1.41e-08	4.29e-05	6	BAX|BCL2|CASP3|IL1B|IL6|TNF	717/44767 genes: 1.60%
Biological Process	2	positive regulation of developmental process	GO:0051094	1.42e-08	4.33e-05	7	BAX|BCL2|CTNNB1|IL1B|IL6|PARP1|TNF	1333/44767 genes: 2.98%
Biological Process	6	regulation of gliogenesis	GO:0014013	1.5e-08	4.59e-05	4	CTNNB1|IL1B|IL6|TNF	107/44767 genes: 0.24%
Biological Process	3	negative regulation of nitrogen compound metabolic process	GO:0051172	1.51e-08	4.59e-05	8	BAX|CASP3|CTNNB1|IL1B|IL6|NOS2|PARP1|TNF	2222/44767 genes: 4.96%
Biological Process	4	response to molecule of bacterial origin	GO:0002237	1.51e-08	4.6e-05	5	CASP3|IL1B|IL6|NOS2|TNF	326/44767 genes: 0.73%
Biological Process	3	response to oxygen levels	GO:0070482	1.51e-08	4.6e-05	5	BCL2|CASP3|CAT|NOS2|TNF	326/44767 genes: 0.73%
Biological Process	3	lymphocyte activation	GO:0046649	1.52e-08	4.62e-05	6	BAX|BCL2|CASP3|CTNNB1|IL1B|IL6	726/44767 genes: 1.62%
Biological Process	4	response to steroid hormone	GO:0048545	1.53e-08	4.67e-05	5	BCL2|CASP3|IL6|PARP1|TNF	327/44767 genes: 0.73%
Biological Process	4	nervous system development	GO:0007399	1.55e-08	4.72e-05	8	BAX|BCL2|CASP3|CDH1|CTNNB1|IL1B|IL6|TNF	2230/44767 genes: 4.98%
Biological Process	5	regulation of neurogenesis	GO:0050767	1.58e-08	4.82e-05	5	CDH1|CTNNB1|IL1B|IL6|TNF	329/44767 genes: 0.73%
Biological Process	4	response to metal ion	GO:0010038	1.6e-08	4.89e-05	5	BCL2|CASP3|CAT|CDH1|PARP1	330/44767 genes: 0.74%
Biological Process	4	macromolecule modification	GO:0043412	1.66e-08	5.05e-05	9	BAX|BCL2|CASP3|CTNNB1|IL1B|IL6|NOS2|PARP1|TNF	3443/44767 genes: 7.69%
Biological Process	1	multicellular organismal process	GO:0032501	1.68e-08	5.13e-05	11	BAX|BCL2|CASP3|CAT|CDH1|CTNNB1|IL1B|IL6|NOS2|PARP1|TNF	7121/44767 genes: 15.91%
Biological Process	6	regulation of epithelial cell apoptotic process	GO:1904035	1.68e-08	5.13e-05	4	BAX|BCL2|IL6|TNF	110/44767 genes: 0.25%
Biological Process	3	regulation of response to stress	GO:0080134	1.73e-08	5.28e-05	7	BAX|BCL2|CTNNB1|IL1B|IL6|PARP1|TNF	1372/44767 genes: 3.06%
Biological Process	2	cell adhesion	GO:0007155	1.8e-08	5.5e-05	7	BCL2|CASP3|CDH1|CTNNB1|IL1B|IL6|TNF	1380/44767 genes: 3.08%
Biological Process	5	leukocyte apoptotic process	GO:0071887	1.81e-08	5.52e-05	4	BAX|BCL2|CASP3|IL6	112/44767 genes: 0.25%
Biological Process	3	regulation of cell adhesion	GO:0030155	1.9e-08	5.79e-05	6	BCL2|CASP3|CDH1|IL1B|IL6|TNF	754/44767 genes: 1.68%
Biological Process	4	positive regulation of glial cell proliferation	GO:0060252	1.95e-08	5.95e-05	3	IL1B|IL6|TNF	21/44767 genes: 0.05%
Biological Process	4	positive regulation of protein metabolic process	GO:0051247	1.96e-08	5.98e-05	7	BAX|BCL2|CASP3|CTNNB1|IL1B|IL6|TNF	1397/44767 genes: 3.12%
Biological Process	3	positive regulation of signal transduction	GO:0009967	1.97e-08	6.01e-05	7	BAX|CAT|CTNNB1|IL1B|IL6|PARP1|TNF	1398/44767 genes: 3.12%
Biological Process	4	astrocyte activation	GO:0048143	2.26e-08	6.89e-05	3	IL1B|IL6|TNF	22/44767 genes: 0.05%
Biological Process	4	gland morphogenesis	GO:0022612	2.39e-08	7.29e-05	4	BAX|BCL2|IL6|TNF	120/44767 genes: 0.27%
Biological Process	7	regulation of peptidyl-serine phosphorylation	GO:0033135	2.39e-08	7.29e-05	4	BAX|BCL2|IL6|TNF	120/44767 genes: 0.27%
Biological Process	3	cell migration	GO:0016477	2.41e-08	7.37e-05	7	BAX|BCL2|CDH1|CTNNB1|IL1B|IL6|TNF	1440/44767 genes: 3.22%
Biological Process	5	regulation of protein modification process	GO:0031399	2.57e-08	7.83e-05	7	BAX|BCL2|CASP3|CTNNB1|IL1B|IL6|TNF	1453/44767 genes: 3.25%
Biological Process	3	programmed cell death involved in cell development	GO:0010623	2.6e-08	7.93e-05	3	BAX|BCL2|IL1B	23/44767 genes: 0.05%
Biological Process	3	regulation of immune response	GO:0050776	2.84e-08	8.66e-05	6	BAX|BCL2|IL1B|IL6|PARP1|TNF	807/44767 genes: 1.80%
Biological Process	2	positive regulation of multicellular organismal process	GO:0051240	3.09e-08	9.44e-05	7	BCL2|CTNNB1|IL1B|IL6|NOS2|PARP1|TNF	1493/44767 genes: 3.34%
Biological Process	4	response to hydrogen peroxide	GO:0042542	3.1e-08	9.46e-05	4	BCL2|CASP3|CAT|IL6	128/44767 genes: 0.29%
Biological Process	4	positive regulation of leukocyte mediated immunity	GO:0002705	3.2e-08	9.76e-05	4	IL1B|IL6|NOS2|TNF	129/44767 genes: 0.29%
Biological Process	2	regulation of developmental process	GO:0050793	3.3e-08	0.000101	8	BAX|BCL2|CDH1|CTNNB1|IL1B|IL6|PARP1|TNF	2457/44767 genes: 5.49%
Biological Process	2	anatomical structure development	GO:0048856	3.68e-08	0.000112	10	BAX|BCL2|CASP3|CAT|CDH1|CTNNB1|IL1B|IL6|PARP1|TNF	5446/44767 genes: 12.17%
Biological Process	2	positive regulation of immune system process	GO:0002684	3.73e-08	0.000114	6	BAX|BCL2|IL1B|IL6|NOS2|TNF	845/44767 genes: 1.89%
Biological Process	3	cell surface receptor signaling pathway	GO:0007166	3.82e-08	0.000116	8	BAX|BCL2|CASP3|CTNNB1|IL1B|IL6|PARP1|TNF	2503/44767 genes: 5.59%
Biological Process	6	response to glucocorticoid	GO:0051384	3.84e-08	0.000117	4	BCL2|CASP3|IL6|TNF	135/44767 genes: 0.30%
Biological Process	4	response to cytokine	GO:0034097	4.05e-08	0.000124	6	BCL2|CASP3|IL1B|IL6|NOS2|TNF	857/44767 genes: 1.91%
Biological Process	3	regulation of cell differentiation	GO:0045595	4.09e-08	0.000125	7	BCL2|CDH1|CTNNB1|IL1B|IL6|PARP1|TNF	1555/44767 genes: 3.47%
Biological Process	4	regulation of nervous system development	GO:0051960	4.13e-08	0.000126	5	CDH1|CTNNB1|IL1B|IL6|TNF	399/44767 genes: 0.89%
Biological Process	3	response to virus	GO:0009615	4.23e-08	0.000129	5	BAX|BCL2|IL1B|IL6|TNF	401/44767 genes: 0.90%
Biological Process	2	anatomical structure morphogenesis	GO:0009653	4.33e-08	0.000132	8	BAX|BCL2|CASP3|CDH1|CTNNB1|IL1B|IL6|TNF	2544/44767 genes: 5.68%
Biological Process	3	positive regulation of cell communication	GO:0010647	4.35e-08	0.000133	7	BAX|CAT|CTNNB1|IL1B|IL6|PARP1|TNF	1569/44767 genes: 3.50%
Biological Process	3	cell differentiation	GO:0030154	4.39e-08	0.000134	9	BAX|BCL2|CASP3|CDH1|CTNNB1|IL1B|IL6|PARP1|TNF	3848/44767 genes: 8.60%
Biological Process	2	positive regulation of signaling	GO:0023056	4.43e-08	0.000135	7	BAX|CAT|CTNNB1|IL1B|IL6|PARP1|TNF	1573/44767 genes: 3.51%
Biological Process	1	metabolic process	GO:0008152	4.44e-08	0.000136	12	BAX|BCL2|CASP3|CAT|CDH1|CTNNB1|GSR|IL1B|IL6|NOS2|PARP1|TNF	10925/44767 genes: 24.40%
Biological Process	4	protein catabolic process	GO:0030163	4.46e-08	0.000136	6	CASP3|CDH1|CTNNB1|IL1B|NOS2|TNF	871/44767 genes: 1.95%
Biological Process	5	regulation of insulin secretion	GO:0050796	4.58e-08	0.00014	4	IL1B|IL6|NOS2|TNF	141/44767 genes: 0.31%
Biological Process	4	response to ionizing radiation	GO:0010212	4.58e-08	0.00014	4	BAX|BCL2|CASP3|PARP1	141/44767 genes: 0.31%
Biological Process	2	cellular developmental process	GO:0048869	4.66e-08	0.000142	9	BAX|BCL2|CASP3|CDH1|CTNNB1|IL1B|IL6|PARP1|TNF	3874/44767 genes: 8.65%
Biological Process	3	positive regulation of cell differentiation	GO:0045597	4.71e-08	0.000144	6	BCL2|CTNNB1|IL1B|IL6|PARP1|TNF	879/44767 genes: 1.96%
Biological Process	5	positive regulation of acute inflammatory response	GO:0002675	4.8e-08	0.000147	3	IL1B|IL6|TNF	28/44767 genes: 0.06%
Biological Process	5	negative regulation of phosphate metabolic process	GO:0045936	4.96e-08	0.000151	5	BAX|CASP3|IL1B|PARP1|TNF	414/44767 genes: 0.92%
Biological Process	4	positive regulation of intracellular signal transduction	GO:1902533	5e-08	0.000153	6	BAX|CAT|CTNNB1|IL1B|IL6|TNF	888/44767 genes: 1.98%
Biological Process	4	negative regulation of phosphorus metabolic process	GO:0010563	5.02e-08	0.000153	5	BAX|CASP3|IL1B|PARP1|TNF	415/44767 genes: 0.93%
Biological Process	2	negative regulation of response to stimulus	GO:0048585	5.19e-08	0.000158	7	BAX|BCL2|CTNNB1|IL1B|IL6|PARP1|TNF	1610/44767 genes: 3.60%
Biological Process	2	cell motility	GO:0048870	5.28e-08	0.000161	7	BAX|BCL2|CDH1|CTNNB1|IL1B|IL6|TNF	1614/44767 genes: 3.61%
Biological Process	2	developmental process involved in reproduction	GO:0003006	5.56e-08	0.000169	6	BAX|BCL2|CASP3|CTNNB1|IL1B|PARP1	904/44767 genes: 2.02%
Biological Process	4	B cell homeostasis	GO:0001782	5.95e-08	0.000182	3	BAX|BCL2|CASP3	30/44767 genes: 0.07%
Biological Process	5	regulation of oxidative stress-induced neuron death	GO:1903203	5.95e-08	0.000182	3	CTNNB1|PARP1|TNF	30/44767 genes: 0.07%
Biological Process	5	negative regulation of extrinsic apoptotic signaling pathway in absence of ligand	GO:2001240	6.59e-08	0.000201	3	BCL2|IL1B|TNF	31/44767 genes: 0.07%
Biological Process	4	negative regulation of signal transduction in absence of ligand	GO:1901099	6.59e-08	0.000201	3	BCL2|IL1B|TNF	31/44767 genes: 0.07%
Biological Process	3	regulation of DNA-binding transcription factor activity	GO:0051090	6.79e-08	0.000207	5	CAT|CTNNB1|IL1B|IL6|TNF	441/44767 genes: 0.99%
Biological Process	3	regulation of response to external stimulus	GO:0032101	7.73e-08	0.000236	6	BAX|BCL2|IL1B|IL6|PARP1|TNF	956/44767 genes: 2.14%
Biological Process	5	cell-cell junction organization	GO:0045216	7.8e-08	0.000238	4	CDH1|CTNNB1|IL1B|TNF	161/44767 genes: 0.36%
Biological Process	4	neuron death in response to oxidative stress	GO:0036475	7.99e-08	0.000244	3	CTNNB1|PARP1|TNF	33/44767 genes: 0.07%
Biological Process	4	regulation of protein transport	GO:0051223	8.19e-08	0.00025	5	CDH1|IL1B|IL6|NOS2|TNF	458/44767 genes: 1.02%
Biological Process	2	regulation of multicellular organismal process	GO:0051239	8.22e-08	0.000251	8	BCL2|CDH1|CTNNB1|IL1B|IL6|NOS2|PARP1|TNF	2762/44767 genes: 6.17%
Biological Process	4	regulation of cell-cell adhesion	GO:0022407	8.28e-08	0.000252	5	CASP3|CDH1|IL1B|IL6|TNF	459/44767 genes: 1.03%
Biological Process	2	negative regulation of developmental process	GO:0051093	8.68e-08	0.000265	6	BCL2|CDH1|CTNNB1|IL1B|IL6|TNF	975/44767 genes: 2.18%
Biological Process	6	regulation of T cell proliferation	GO:0042129	9.03e-08	0.000276	4	CASP3|CTNNB1|IL1B|IL6	167/44767 genes: 0.37%
Biological Process	2	immune response	GO:0006955	9.26e-08	0.000282	7	BAX|BCL2|IL1B|IL6|NOS2|PARP1|TNF	1752/44767 genes: 3.91%
Biological Process	3	defense response to other organism	GO:0098542	9.28e-08	0.000283	6	BCL2|IL1B|IL6|NOS2|PARP1|TNF	986/44767 genes: 2.20%
Biological Process	4	regulation of lymphocyte activation	GO:0051249	9.31e-08	0.000284	5	BCL2|CASP3|CTNNB1|IL1B|IL6	470/44767 genes: 1.05%
Biological Process	1	developmental process	GO:0032502	9.31e-08	0.000284	10	BAX|BCL2|CASP3|CAT|CDH1|CTNNB1|IL1B|IL6|PARP1|TNF	5990/44767 genes: 13.38%
Biological Process	3	regulation of signal transduction	GO:0009966	9.38e-08	0.000286	8	BAX|BCL2|CAT|CTNNB1|IL1B|IL6|PARP1|TNF	2809/44767 genes: 6.27%
Biological Process	4	regulation of peptide hormone secretion	GO:0090276	9.7e-08	0.000296	4	IL1B|IL6|NOS2|TNF	170/44767 genes: 0.38%
Biological Process	4	gene expression	GO:0010467	9.77e-08	0.000298	10	BCL2|CASP3|CAT|CDH1|CTNNB1|IL1B|IL6|NOS2|PARP1|TNF	6020/44767 genes: 13.45%
Biological Process	5	regulation of peptide secretion	GO:0002791	1.04e-07	0.000318	4	IL1B|IL6|NOS2|TNF	173/44767 genes: 0.39%
Biological Process	3	interleukin-6 production	GO:0032635	1.07e-07	0.000325	4	IL1B|IL6|NOS2|TNF	174/44767 genes: 0.39%
Biological Process	4	regulation of interleukin-6 production	GO:0032675	1.07e-07	0.000325	4	IL1B|IL6|NOS2|TNF	174/44767 genes: 0.39%
Biological Process	4	regulation of establishment of protein localization	GO:0070201	1.07e-07	0.000325	5	CDH1|IL1B|IL6|NOS2|TNF	483/44767 genes: 1.08%
Biological Process	3	cellular nitrogen compound metabolic process	GO:0034641	1.08e-07	0.000331	10	BAX|CASP3|CAT|CDH1|CTNNB1|IL1B|IL6|NOS2|PARP1|TNF	6084/44767 genes: 13.59%
Biological Process	5	insulin secretion	GO:0030073	1.09e-07	0.000333	4	IL1B|IL6|NOS2|TNF	175/44767 genes: 0.39%
Biological Process	4	regulation of peptide transport	GO:0090087	1.09e-07	0.000333	4	IL1B|IL6|NOS2|TNF	175/44767 genes: 0.39%
Biological Process	6	regulation of protein phosphorylation	GO:0001932	1.11e-07	0.00034	6	BAX|BCL2|CASP3|IL1B|IL6|TNF	1017/44767 genes: 2.27%
Biological Process	5	negative regulation of protein modification process	GO:0031400	1.18e-07	0.00036	5	BAX|CASP3|CTNNB1|IL1B|TNF	493/44767 genes: 1.10%
Biological Process	3	positive regulation of immune response	GO:0050778	1.28e-07	0.00039	5	BAX|BCL2|IL1B|IL6|TNF	501/44767 genes: 1.12%
Biological Process	4	regulation of glial cell proliferation	GO:0060251	1.34e-07	0.000408	3	IL1B|IL6|TNF	39/44767 genes: 0.09%
Biological Process	4	negative regulation of protein metabolic process	GO:0051248	1.42e-07	0.000434	6	BAX|CASP3|CTNNB1|IL1B|NOS2|TNF	1060/44767 genes: 2.37%
Biological Process	3	regulation of cell cycle	GO:0051726	1.45e-07	0.000441	6	BAX|BCL2|CASP3|CTNNB1|IL1B|TNF	1063/44767 genes: 2.37%
Biological Process	5	astrocyte development	GO:0014002	1.45e-07	0.000441	3	IL1B|IL6|TNF	40/44767 genes: 0.09%
Biological Process	5	regulation of neuroinflammatory response	GO:0150077	1.45e-07	0.000441	3	IL1B|IL6|TNF	40/44767 genes: 0.09%
Biological Process	4	T cell homeostasis	GO:0043029	1.45e-07	0.000441	3	BAX|BCL2|CASP3	40/44767 genes: 0.09%
Biological Process	4	regulation of DNA metabolic process	GO:0051052	1.45e-07	0.000442	5	BAX|CTNNB1|IL6|PARP1|TNF	514/44767 genes: 1.15%
Biological Process	5	positive regulation of apoptotic process	GO:0043065	1.46e-07	0.000447	5	BAX|CASP3|CTNNB1|IL6|TNF	515/44767 genes: 1.15%
Biological Process	3	humoral immune response	GO:0006959	1.55e-07	0.000472	4	BCL2|IL1B|IL6|TNF	191/44767 genes: 0.43%
Biological Process	5	cellular response to lipopolysaccharide	GO:0071222	1.58e-07	0.000482	4	IL1B|IL6|NOS2|TNF	192/44767 genes: 0.43%
Biological Process	5	regulation of extrinsic apoptotic signaling pathway in absence of ligand	GO:2001239	1.68e-07	0.000512	3	BCL2|IL1B|TNF	42/44767 genes: 0.09%
Biological Process	4	positive regulation of nucleobase-containing compound metabolic process	GO:0045935	1.76e-07	0.000537	7	BAX|CDH1|CTNNB1|IL1B|IL6|PARP1|TNF	1925/44767 genes: 4.30%
Biological Process	3	negative regulation of macromolecule metabolic process	GO:0010605	1.78e-07	0.000543	8	BAX|CASP3|CTNNB1|IL1B|IL6|NOS2|PARP1|TNF	3051/44767 genes: 6.82%
Biological Process	3	vascular endothelial growth factor production	GO:0010573	1.8e-07	0.000551	3	IL1B|IL6|TNF	43/44767 genes: 0.10%
Biological Process	4	response to reactive oxygen species	GO:0000302	1.82e-07	0.000556	4	BCL2|CASP3|CAT|IL6	199/44767 genes: 0.44%
Biological Process	3	response to wounding	GO:0009611	1.92e-07	0.000586	5	BAX|BCL2|CASP3|IL6|TNF	544/44767 genes: 1.22%
Biological Process	4	regulation of gene expression	GO:0010468	1.95e-07	0.000596	9	BCL2|CAT|CDH1|CTNNB1|IL1B|IL6|NOS2|PARP1|TNF	4565/44767 genes: 10.20%
Biological Process	4	cellular response to molecule of bacterial origin	GO:0071219	1.97e-07	0.000603	4	IL1B|IL6|NOS2|TNF	203/44767 genes: 0.45%
Biological Process	7	positive regulation of calcidiol 1-monooxygenase activity	GO:0060559	1.98e-07	0.000603	2	IL1B|TNF	3/44767 genes: 0.01%
Biological Process	6	regulation of nitrogen utilization	GO:0006808	1.98e-07	0.000603	2	BAX|BCL2	3/44767 genes: 0.01%
Biological Process	5	peptidyl-amino acid modification	GO:0018193	2.01e-07	0.000612	6	BAX|BCL2|CTNNB1|IL6|NOS2|TNF	1124/44767 genes: 2.51%
Biological Process	2	negative regulation of multicellular organismal process	GO:0051241	2.02e-07	0.000616	6	BCL2|CDH1|CTNNB1|IL1B|IL6|TNF	1125/44767 genes: 2.51%
Biological Process	2	nitrogen compound metabolic process	GO:0006807	2.03e-07	0.00062	11	BAX|BCL2|CASP3|CAT|CDH1|CTNNB1|IL1B|IL6|NOS2|PARP1|TNF	8968/44767 genes: 20.03%
Biological Process	3	macromolecule metabolic process	GO:0043170	2.08e-07	0.000635	11	BAX|BCL2|CASP3|CAT|CDH1|CTNNB1|IL1B|IL6|NOS2|PARP1|TNF	8987/44767 genes: 20.08%
Biological Process	6	regulation of phosphorylation	GO:0042325	2.11e-07	0.000645	6	BAX|BCL2|CASP3|IL1B|IL6|TNF	1134/44767 genes: 2.53%
Biological Process	4	extrinsic apoptotic signaling pathway	GO:0097191	2.22e-07	0.000677	4	BAX|BCL2|IL1B|TNF	209/44767 genes: 0.47%
Biological Process	5	regulation of endothelial cell differentiation	GO:0045601	2.22e-07	0.000677	3	CTNNB1|IL1B|TNF	46/44767 genes: 0.10%
Biological Process	4	positive regulation of neurogenesis	GO:0050769	2.26e-07	0.00069	4	CTNNB1|IL1B|IL6|TNF	210/44767 genes: 0.47%
Biological Process	4	circulatory system development	GO:0072359	2.33e-07	0.000711	6	BAX|CASP3|CTNNB1|IL1B|IL6|TNF	1153/44767 genes: 2.58%
Biological Process	5	regulation of acute inflammatory response	GO:0002673	2.37e-07	0.000723	3	IL1B|IL6|TNF	47/44767 genes: 0.10%
Biological Process	3	response to nicotine	GO:0035094	2.37e-07	0.000723	3	BCL2|CASP3|TNF	47/44767 genes: 0.10%
Biological Process	5	cellular response to lipid	GO:0071396	2.38e-07	0.000725	5	IL1B|IL6|NOS2|PARP1|TNF	568/44767 genes: 1.27%
Biological Process	6	acute-phase response	GO:0006953	2.53e-07	0.000771	3	IL1B|IL6|TNF	48/44767 genes: 0.11%
Biological Process	5	peptide hormone secretion	GO:0030072	2.53e-07	0.000772	4	IL1B|IL6|NOS2|TNF	216/44767 genes: 0.48%
Biological Process	4	organonitrogen compound catabolic process	GO:1901565	2.63e-07	0.000803	6	CASP3|CDH1|CTNNB1|IL1B|NOS2|TNF	1177/44767 genes: 2.63%
Biological Process	5	peptide secretion	GO:0002790	2.77e-07	0.000846	4	IL1B|IL6|NOS2|TNF	221/44767 genes: 0.49%
Biological Process	3	reactive oxygen species metabolic process	GO:0072593	2.77e-07	0.000846	4	BCL2|CAT|NOS2|TNF	221/44767 genes: 0.49%
Biological Process	4	glial cell differentiation	GO:0010001	2.82e-07	0.000862	4	CTNNB1|IL1B|IL6|TNF	222/44767 genes: 0.50%
Biological Process	4	regulation of leukocyte mediated immunity	GO:0002703	2.82e-07	0.000862	4	IL1B|IL6|NOS2|TNF	222/44767 genes: 0.50%
Biological Process	3	regulation of hormone secretion	GO:0046883	2.88e-07	0.000877	4	IL1B|IL6|NOS2|TNF	223/44767 genes: 0.50%
Biological Process	4	regulation of macromolecule biosynthetic process	GO:0010556	2.95e-07	0.000899	8	BCL2|CAT|CDH1|CTNNB1|IL1B|IL6|PARP1|TNF	3256/44767 genes: 7.27%
Biological Process	6	peptidyl-serine phosphorylation	GO:0018105	3.03e-07	0.000925	4	BAX|BCL2|IL6|TNF	226/44767 genes: 0.50%
Biological Process	3	glial cell activation	GO:0061900	3.04e-07	0.000928	3	IL1B|IL6|TNF	51/44767 genes: 0.11%
Biological Process	1	localization	GO:0051179	3.07e-07	0.000937	9	BAX|BCL2|CDH1|CTNNB1|IL1B|IL6|NOS2|PARP1|TNF	4809/44767 genes: 10.74%
Biological Process	4	response to carbohydrate	GO:0009743	3.14e-07	0.000959	4	CASP3|CAT|IL1B|TNF	228/44767 genes: 0.51%
Biological Process	3	cellular response to biotic stimulus	GO:0071216	3.2e-07	0.000975	4	IL1B|IL6|NOS2|TNF	229/44767 genes: 0.51%
Biological Process	4	mesenchymal cell differentiation	GO:0048762	3.31e-07	0.00101	4	BCL2|CTNNB1|IL1B|IL6	231/44767 genes: 0.52%
Biological Process	4	regulation of nucleobase-containing compound metabolic process	GO:0019219	3.35e-07	0.00102	8	BAX|CAT|CDH1|CTNNB1|IL1B|IL6|PARP1|TNF	3310/44767 genes: 7.39%
Biological Process	3	regulation of catalytic activity	GO:0050790	3.41e-07	0.00104	7	BAX|BCL2|CASP3|CTNNB1|IL1B|PARP1|TNF	2121/44767 genes: 4.74%
Biological Process	4	programmed necrotic cell death	GO:0097300	3.42e-07	0.00104	3	BAX|PARP1|TNF	53/44767 genes: 0.12%
Biological Process	4	cell junction organization	GO:0034330	3.52e-07	0.00107	5	BCL2|CDH1|CTNNB1|IL1B|TNF	615/44767 genes: 1.37%
Biological Process	3	tissue homeostasis	GO:0001894	3.54e-07	0.00108	4	BAX|BCL2|CTNNB1|IL6	235/44767 genes: 0.52%
Biological Process	3	glial cell proliferation	GO:0014009	3.62e-07	0.0011	3	IL1B|IL6|TNF	54/44767 genes: 0.12%
Biological Process	2	primary metabolic process	GO:0044238	3.71e-07	0.00113	11	BAX|BCL2|CASP3|CAT|CDH1|CTNNB1|IL1B|IL6|NOS2|PARP1|TNF	9484/44767 genes: 21.19%
Biological Process	3	negative regulation of signal transduction	GO:0009968	3.76e-07	0.00115	6	BAX|BCL2|CTNNB1|IL1B|IL6|TNF	1251/44767 genes: 2.79%
Biological Process	3	cellular biosynthetic process	GO:0044249	3.88e-07	0.00118	9	BCL2|CAT|CDH1|CTNNB1|IL1B|IL6|NOS2|PARP1|TNF	4940/44767 genes: 11.03%
Biological Process	3	positive regulation of epithelial to mesenchymal transition	GO:0010718	4.05e-07	0.00123	3	CTNNB1|IL1B|IL6	56/44767 genes: 0.13%
Biological Process	5	peptide transport	GO:0015833	4.12e-07	0.00126	4	IL1B|IL6|NOS2|TNF	244/44767 genes: 0.55%
Biological Process	6	peptidyl-serine modification	GO:0018209	4.12e-07	0.00126	4	BAX|BCL2|IL6|TNF	244/44767 genes: 0.55%
Biological Process	4	regulation of protein secretion	GO:0050708	4.19e-07	0.00128	4	IL1B|IL6|NOS2|TNF	245/44767 genes: 0.55%
Biological Process	5	generation of neurons	GO:0048699	4.19e-07	0.00128	6	BAX|BCL2|CASP3|CDH1|CTNNB1|IL6	1274/44767 genes: 2.85%
Biological Process	4	extrinsic apoptotic signaling pathway in absence of ligand	GO:0097192	4.27e-07	0.0013	3	BCL2|IL1B|TNF	57/44767 genes: 0.13%
Biological Process	5	response to gamma radiation	GO:0010332	4.27e-07	0.0013	3	BAX|BCL2|PARP1	57/44767 genes: 0.13%
Biological Process	3	signal transduction in absence of ligand	GO:0038034	4.27e-07	0.0013	3	BCL2|IL1B|TNF	57/44767 genes: 0.13%
Biological Process	4	regulation of cellular biosynthetic process	GO:0031326	4.29e-07	0.00131	8	BCL2|CAT|CDH1|CTNNB1|IL1B|IL6|PARP1|TNF	3418/44767 genes: 7.64%
Biological Process	3	positive regulation of immune effector process	GO:0002699	4.32e-07	0.00132	4	IL1B|IL6|NOS2|TNF	247/44767 genes: 0.55%
Biological Process	3	cell fate commitment	GO:0045165	4.39e-07	0.00134	4	BCL2|CASP3|CTNNB1|IL6	248/44767 genes: 0.55%
Biological Process	3	positive regulation of nervous system development	GO:0051962	4.61e-07	0.00141	4	CTNNB1|IL1B|IL6|TNF	251/44767 genes: 0.56%
Biological Process	4	protein transport	GO:0015031	4.65e-07	0.00142	6	BAX|CDH1|IL1B|IL6|NOS2|TNF	1297/44767 genes: 2.90%
Biological Process	3	cellular response to endogenous stimulus	GO:0071495	4.67e-07	0.00143	6	CASP3|CDH1|CTNNB1|IL1B|PARP1|TNF	1298/44767 genes: 2.90%
Biological Process	4	B cell activation	GO:0042113	4.68e-07	0.00143	4	BAX|BCL2|CASP3|IL6	252/44767 genes: 0.56%
Biological Process	4	regulation of ion transport	GO:0043269	4.73e-07	0.00144	5	BAX|BCL2|CTNNB1|IL1B|TNF	653/44767 genes: 1.46%
Biological Process	3	regulation of biosynthetic process	GO:0009889	4.95e-07	0.00151	8	BCL2|CAT|CDH1|CTNNB1|IL1B|IL6|PARP1|TNF	3482/44767 genes: 7.78%
Biological Process	2	biosynthetic process	GO:0009058	5.03e-07	0.00153	9	BCL2|CAT|CDH1|CTNNB1|IL1B|IL6|NOS2|PARP1|TNF	5090/44767 genes: 11.37%
Biological Process	2	execution phase of apoptosis	GO:0097194	5.25e-07	0.0016	3	BAX|CASP3|IL6	61/44767 genes: 0.14%
Biological Process	2	regulation of cellular process	GO:0050794	5.58e-07	0.0017	11	BAX|BCL2|CASP3|CAT|CDH1|CTNNB1|IL1B|IL6|NOS2|PARP1|TNF	9850/44767 genes: 22.00%
Biological Process	5	cellular response to growth factor stimulus	GO:0071363	5.65e-07	0.00172	5	CASP3|CAT|CTNNB1|IL1B|PARP1	677/44767 genes: 1.51%
Biological Process	4	blood vessel morphogenesis	GO:0048514	5.69e-07	0.00174	5	BAX|CTNNB1|IL1B|IL6|TNF	678/44767 genes: 1.51%
Biological Process	4	brain development	GO:0007420	5.82e-07	0.00178	5	BAX|BCL2|CASP3|CDH1|CTNNB1	681/44767 genes: 1.52%
Biological Process	3	negative regulation of cell communication	GO:0010648	5.85e-07	0.00179	6	BAX|BCL2|CTNNB1|IL1B|IL6|TNF	1349/44767 genes: 3.01%
Biological Process	2	negative regulation of signaling	GO:0023057	6.01e-07	0.00183	6	BAX|BCL2|CTNNB1|IL1B|IL6|TNF	1355/44767 genes: 3.03%
Biological Process	3	negative regulation of cell differentiation	GO:0045596	6.21e-07	0.00189	5	CDH1|CTNNB1|IL1B|IL6|TNF	690/44767 genes: 1.54%
Biological Process	3	lymphocyte homeostasis	GO:0002260	6.37e-07	0.00194	3	BAX|BCL2|CASP3	65/44767 genes: 0.15%
Biological Process	4	defense response to bacterium	GO:0042742	6.44e-07	0.00197	4	IL1B|IL6|NOS2|TNF	273/44767 genes: 0.61%
Biological Process	5	cellular response to indole-3-methanol	GO:0071681	6.58e-07	0.00201	2	CDH1|CTNNB1	5/44767 genes: 0.01%
Biological Process	5	nitrogen utilization	GO:0019740	6.58e-07	0.00201	2	BAX|BCL2	5/44767 genes: 0.01%
Biological Process	6	positive regulation of apoptotic DNA fragmentation	GO:1902512	6.58e-07	0.00201	2	BAX|IL6	5/44767 genes: 0.01%
Biological Process	4	retinal cell programmed cell death	GO:0046666	6.58e-07	0.00201	2	BAX|BCL2	5/44767 genes: 0.01%
Biological Process	1	reproductive process	GO:0022414	6.86e-07	0.00209	6	BAX|BCL2|CASP3|CTNNB1|IL1B|PARP1	1386/44767 genes: 3.10%
Biological Process	3	sex differentiation	GO:0007548	6.93e-07	0.00211	4	BAX|BCL2|CASP3|CTNNB1	278/44767 genes: 0.62%
Biological Process	4	response to growth factor	GO:0070848	7e-07	0.00214	5	CASP3|CAT|CTNNB1|IL1B|PARP1	707/44767 genes: 1.58%
Biological Process	1	reproduction	GO:0000003	7.06e-07	0.00216	6	BAX|BCL2|CASP3|CTNNB1|IL1B|PARP1	1393/44767 genes: 3.11%
Biological Process	4	hormone secretion	GO:0046879	7.23e-07	0.00221	4	IL1B|IL6|NOS2|TNF	281/44767 genes: 0.63%
Biological Process	4	positive regulation of chemokine production	GO:0032722	7.3e-07	0.00223	3	IL1B|IL6|TNF	68/44767 genes: 0.15%
Biological Process	3	establishment of protein localization	GO:0045184	7.46e-07	0.00228	6	BAX|CDH1|IL1B|IL6|NOS2|TNF	1406/44767 genes: 3.14%
Biological Process	5	positive regulation of gliogenesis	GO:0014015	7.63e-07	0.00233	3	IL1B|IL6|TNF	69/44767 genes: 0.15%
Biological Process	4	regulation of mitochondrial membrane potential	GO:0051881	7.63e-07	0.00233	3	BAX|BCL2|PARP1	69/44767 genes: 0.15%
Biological Process	5	protein phosphorylation	GO:0006468	7.65e-07	0.00233	6	BAX|BCL2|CASP3|IL1B|IL6|TNF	1412/44767 genes: 3.15%
Biological Process	5	amide transport	GO:0042886	7.65e-07	0.00233	4	IL1B|IL6|NOS2|TNF	285/44767 genes: 0.64%
Biological Process	2	response to activity	GO:0014823	7.97e-07	0.00243	3	CAT|IL6|TNF	70/44767 genes: 0.16%
Biological Process	4	anatomical structure homeostasis	GO:0060249	8.08e-07	0.00247	4	BAX|BCL2|CTNNB1|IL6	289/44767 genes: 0.65%
Biological Process	1	rhythmic process	GO:0048511	8.08e-07	0.00247	4	CASP3|NOS2|PARP1|TNF	289/44767 genes: 0.65%
Biological Process	3	head development	GO:0060322	8.14e-07	0.00248	5	BAX|BCL2|CASP3|CDH1|CTNNB1	729/44767 genes: 1.63%
Biological Process	4	homeostasis of number of cells	GO:0048872	8.2e-07	0.0025	4	BAX|BCL2|CASP3|IL6	290/44767 genes: 0.65%
Biological Process	4	hormone transport	GO:0009914	8.2e-07	0.0025	4	IL1B|IL6|NOS2|TNF	290/44767 genes: 0.65%
Biological Process	4	mesenchyme development	GO:0060485	8.31e-07	0.00254	4	BCL2|CTNNB1|IL1B|IL6	291/44767 genes: 0.65%
Biological Process	5	neuroinflammatory response	GO:0150076	8.32e-07	0.00254	3	IL1B|IL6|TNF	71/44767 genes: 0.16%
Biological Process	2	signal transduction	GO:0007165	8.48e-07	0.00259	9	BAX|BCL2|CASP3|CAT|CTNNB1|IL1B|IL6|PARP1|TNF	5407/44767 genes: 12.08%
Biological Process	2	regulation of response to stimulus	GO:0048583	8.56e-07	0.00261	8	BAX|BCL2|CAT|CTNNB1|IL1B|IL6|PARP1|TNF	3739/44767 genes: 8.35%
Biological Process	3	necrotic cell death	GO:0070265	8.68e-07	0.00265	3	BAX|PARP1|TNF	72/44767 genes: 0.16%
Biological Process	3	cellular component organization	GO:0016043	8.84e-07	0.0027	9	BAX|BCL2|CASP3|CDH1|CTNNB1|IL1B|IL6|PARP1|TNF	5433/44767 genes: 12.14%
Biological Process	3	reproductive structure development	GO:0048608	9.01e-07	0.00275	4	BAX|BCL2|CASP3|CTNNB1	297/44767 genes: 0.66%
Biological Process	4	ion transport	GO:0006811	9.15e-07	0.00279	6	BAX|BCL2|CTNNB1|IL1B|NOS2|TNF	1456/44767 genes: 3.25%
Biological Process	3	cellular aromatic compound metabolic process	GO:0006725	9.49e-07	0.0029	9	BAX|BCL2|CAT|CDH1|CTNNB1|IL1B|IL6|PARP1|TNF	5478/44767 genes: 12.24%
Biological Process	4	reproductive system development	GO:0061458	9.5e-07	0.0029	4	BAX|BCL2|CASP3|CTNNB1	301/44767 genes: 0.67%
Biological Process	5	positive regulation of DNA catabolic process	GO:1903626	9.87e-07	0.00301	2	BAX|IL6	6/44767 genes: 0.01%
Biological Process	4	regulation of branching involved in lung morphogenesis	GO:0061046	9.87e-07	0.00301	2	CTNNB1|TNF	6/44767 genes: 0.01%
Biological Process	5	response to indole-3-methanol	GO:0071680	9.87e-07	0.00301	2	CDH1|CTNNB1	6/44767 genes: 0.01%
Biological Process	5	gliogenesis	GO:0042063	9.89e-07	0.00302	4	CTNNB1|IL1B|IL6|TNF	304/44767 genes: 0.68%
Biological Process	4	kidney development	GO:0001822	9.89e-07	0.00302	4	BAX|BCL2|CAT|CTNNB1	304/44767 genes: 0.68%
Biological Process	3	blood vessel development	GO:0001568	9.99e-07	0.00305	5	BAX|CTNNB1|IL1B|IL6|TNF	760/44767 genes: 1.70%
Biological Process	3	cytokine production involved in inflammatory response	GO:0002534	1.02e-06	0.00312	3	IL6|NOS2|TNF	76/44767 genes: 0.17%
Biological Process	3	diencephalon development	GO:0021536	1.02e-06	0.00312	3	BAX|CDH1|CTNNB1	76/44767 genes: 0.17%
Biological Process	5	nitric oxide biosynthetic process	GO:0006809	1.02e-06	0.00312	3	IL1B|NOS2|TNF	76/44767 genes: 0.17%
Biological Process	4	regulation of cytokine production involved in inflammatory response	GO:1900015	1.02e-06	0.00312	3	IL6|NOS2|TNF	76/44767 genes: 0.17%
Biological Process	3	negative regulation of catabolic process	GO:0009895	1.08e-06	0.0033	4	BCL2|IL1B|NOS2|TNF	311/44767 genes: 0.69%
Biological Process	2	organic substance metabolic process	GO:0071704	1.1e-06	0.00335	11	BAX|BCL2|CASP3|CAT|CDH1|CTNNB1|IL1B|IL6|NOS2|PARP1|TNF	10491/44767 genes: 23.43%
Biological Process	2	cellular component organization or biogenesis	GO:0071840	1.1e-06	0.00337	9	BAX|BCL2|CASP3|CDH1|CTNNB1|IL1B|IL6|PARP1|TNF	5575/44767 genes: 12.45%
Biological Process	4	phosphate-containing compound metabolic process	GO:0006796	1.11e-06	0.00338	7	BAX|BCL2|CASP3|IL1B|IL6|PARP1|TNF	2525/44767 genes: 5.64%
Biological Process	4	renal system development	GO:0072001	1.11e-06	0.00339	4	BAX|BCL2|CAT|CTNNB1	313/44767 genes: 0.70%
Biological Process	2	cell-cell signaling	GO:0007267	1.12e-06	0.00341	6	CDH1|CTNNB1|IL1B|IL6|NOS2|TNF	1507/44767 genes: 3.37%
Biological Process	2	maintenance of location	GO:0051235	1.12e-06	0.00343	4	BAX|IL1B|IL6|TNF	314/44767 genes: 0.70%
Biological Process	4	regulation of oxidative stress-induced cell death	GO:1903201	1.15e-06	0.00351	3	CTNNB1|PARP1|TNF	79/44767 genes: 0.18%
Biological Process	4	protein secretion	GO:0009306	1.15e-06	0.00352	4	IL1B|IL6|NOS2|TNF	316/44767 genes: 0.71%
Biological Process	4	establishment of protein localization to extracellular region	GO:0035592	1.17e-06	0.00356	4	IL1B|IL6|NOS2|TNF	317/44767 genes: 0.71%
Biological Process	3	phosphorus metabolic process	GO:0006793	1.19e-06	0.00364	7	BAX|BCL2|CASP3|IL1B|IL6|PARP1|TNF	2552/44767 genes: 5.70%
Biological Process	5	astrocyte differentiation	GO:0048708	1.19e-06	0.00365	3	IL1B|IL6|TNF	80/44767 genes: 0.18%
Biological Process	3	cellular response to abiotic stimulus	GO:0071214	1.2e-06	0.00365	4	BAX|CASP3|IL1B|PARP1	319/44767 genes: 0.71%
Biological Process	3	cellular response to environmental stimulus	GO:0104004	1.2e-06	0.00365	4	BAX|CASP3|IL1B|PARP1	319/44767 genes: 0.71%
Biological Process	4	vasculature development	GO:0001944	1.22e-06	0.00373	5	BAX|CTNNB1|IL1B|IL6|TNF	792/44767 genes: 1.77%
Biological Process	5	B cell proliferation	GO:0042100	1.24e-06	0.00379	3	BAX|BCL2|CASP3	81/44767 genes: 0.18%
Biological Process	4	proteolysis	GO:0006508	1.26e-06	0.00384	6	BAX|CASP3|CTNNB1|IL1B|PARP1|TNF	1538/44767 genes: 3.44%
Biological Process	5	protein localization to extracellular region	GO:0071692	1.27e-06	0.00389	4	IL1B|IL6|NOS2|TNF	324/44767 genes: 0.72%
Biological Process	5	extrinsic apoptotic signaling pathway via death domain receptors	GO:0008625	1.29e-06	0.00393	3	BAX|BCL2|TNF	82/44767 genes: 0.18%
Biological Process	4	nitric oxide metabolic process	GO:0046209	1.29e-06	0.00393	3	IL1B|NOS2|TNF	82/44767 genes: 0.18%
Biological Process	4	epithelial tube morphogenesis	GO:0060562	1.32e-06	0.00403	4	BCL2|CASP3|CTNNB1|TNF	327/44767 genes: 0.73%
Biological Process	3	reactive nitrogen species metabolic process	GO:2001057	1.34e-06	0.00408	3	IL1B|NOS2|TNF	83/44767 genes: 0.19%
Biological Process	3	organic cyclic compound metabolic process	GO:1901360	1.35e-06	0.00411	9	BAX|BCL2|CAT|CDH1|CTNNB1|IL1B|IL6|PARP1|TNF	5705/44767 genes: 12.74%
Biological Process	4	positive regulation of fever generation	GO:0031622	1.38e-06	0.00422	2	IL1B|TNF	7/44767 genes: 0.02%
Biological Process	6	regulation of calcidiol 1-monooxygenase activity	GO:0060558	1.38e-06	0.00422	2	IL1B|TNF	7/44767 genes: 0.02%
Biological Process	4	regulation of protein catabolic process	GO:0042176	1.4e-06	0.00428	4	CDH1|IL1B|NOS2|TNF	332/44767 genes: 0.74%
Biological Process	3	lipid storage	GO:0019915	1.44e-06	0.00438	3	IL1B|IL6|TNF	85/44767 genes: 0.19%
Biological Process	3	response to osmotic stress	GO:0006970	1.44e-06	0.00438	3	BAX|CASP3|TNF	85/44767 genes: 0.19%
Biological Process	7	positive regulation of peptidyl-serine phosphorylation	GO:0033138	1.49e-06	0.00454	3	BCL2|IL6|TNF	86/44767 genes: 0.19%
Biological Process	6	positive regulation of DNA-templated transcription	GO:0045893	1.5e-06	0.00456	6	CDH1|CTNNB1|IL1B|IL6|PARP1|TNF	1584/44767 genes: 3.54%
Biological Process	6	positive regulation of nucleic acid-templated transcription	GO:1903508	1.5e-06	0.00456	6	CDH1|CTNNB1|IL1B|IL6|PARP1|TNF	1584/44767 genes: 3.54%
Biological Process	2	multicellular organismal reproductive process	GO:0048609	1.51e-06	0.00461	5	BAX|BCL2|CASP3|CTNNB1|PARP1	827/44767 genes: 1.85%
Biological Process	4	macromolecule biosynthetic process	GO:0009059	1.52e-06	0.00463	8	BCL2|CAT|CDH1|CTNNB1|IL1B|IL6|PARP1|TNF	4029/44767 genes: 9.00%
Biological Process	1	regulation of biological process	GO:0050789	1.53e-06	0.00466	11	BAX|BCL2|CASP3|CAT|CDH1|CTNNB1|IL1B|IL6|NOS2|PARP1|TNF	10818/44767 genes: 24.17%
Biological Process	5	positive regulation of RNA biosynthetic process	GO:1902680	1.53e-06	0.00466	6	CDH1|CTNNB1|IL1B|IL6|PARP1|TNF	1590/44767 genes: 3.55%
Biological Process	3	defense response	GO:0006952	1.55e-06	0.00471	6	BCL2|IL1B|IL6|NOS2|PARP1|TNF	1593/44767 genes: 3.56%
Biological Process	5	neuron projection development	GO:0031175	1.57e-06	0.00478	5	BCL2|CASP3|CDH1|CTNNB1|IL6	833/44767 genes: 1.86%
Biological Process	4	regulation of angiogenesis	GO:0045765	1.58e-06	0.00482	4	CTNNB1|IL1B|IL6|TNF	342/44767 genes: 0.76%
Biological Process	3	hair follicle development	GO:0001942	1.59e-06	0.00486	3	BCL2|CTNNB1|TNF	88/44767 genes: 0.20%
Biological Process	3	transport	GO:0006810	1.68e-06	0.00511	8	BAX|BCL2|CDH1|CTNNB1|IL1B|IL6|NOS2|TNF	4081/44767 genes: 9.12%
Biological Process	4	cellular nitrogen compound biosynthetic process	GO:0044271	1.69e-06	0.00516	8	CAT|CDH1|CTNNB1|IL1B|IL6|NOS2|PARP1|TNF	4086/44767 genes: 9.13%
Biological Process	4	regulation of vasculature development	GO:1901342	1.69e-06	0.00516	4	CTNNB1|IL1B|IL6|TNF	348/44767 genes: 0.78%
Biological Process	5	regulation of leukocyte cell-cell adhesion	GO:1903037	1.71e-06	0.00522	4	CASP3|IL1B|IL6|TNF	349/44767 genes: 0.78%
Biological Process	3	positive regulation of leukocyte activation	GO:0002696	1.73e-06	0.00528	4	BCL2|IL1B|IL6|TNF	350/44767 genes: 0.78%
Biological Process	5	regulation of T cell activation	GO:0050863	1.75e-06	0.00534	4	CASP3|CTNNB1|IL1B|IL6	351/44767 genes: 0.78%
Biological Process	3	hair cycle process	GO:0022405	1.76e-06	0.00538	3	BCL2|CTNNB1|TNF	91/44767 genes: 0.20%
Biological Process	2	molting cycle process	GO:0022404	1.76e-06	0.00538	3	BCL2|CTNNB1|TNF	91/44767 genes: 0.20%
Biological Process	4	urogenital system development	GO:0001655	1.77e-06	0.0054	4	BAX|BCL2|CAT|CTNNB1	352/44767 genes: 0.79%
Biological Process	5	skin epidermis development	GO:0098773	1.82e-06	0.00556	3	BCL2|CTNNB1|TNF	92/44767 genes: 0.21%
Biological Process	3	positive regulation of heat generation	GO:0031652	1.84e-06	0.00562	2	IL1B|TNF	8/44767 genes: 0.02%
Biological Process	3	leukocyte mediated immunity	GO:0002443	1.85e-06	0.00565	4	IL1B|IL6|NOS2|TNF	356/44767 genes: 0.80%
Biological Process	2	multicellular organism reproduction	GO:0032504	1.85e-06	0.00565	5	BAX|BCL2|CASP3|CTNNB1|PARP1	862/44767 genes: 1.93%
Biological Process	4	organonitrogen compound biosynthetic process	GO:1901566	1.88e-06	0.00574	6	BCL2|CTNNB1|IL1B|IL6|PARP1|TNF	1648/44767 genes: 3.68%
Biological Process	5	negative regulation of extrinsic apoptotic signaling pathway	GO:2001237	1.88e-06	0.00575	3	BCL2|IL1B|TNF	93/44767 genes: 0.21%
Biological Process	2	cell cycle	GO:0007049	1.9e-06	0.00578	6	BAX|BCL2|CASP3|CTNNB1|IL1B|TNF	1650/44767 genes: 3.69%
Biological Process	5	regulation of DNA-templated transcription	GO:0006355	1.92e-06	0.00585	7	CAT|CDH1|CTNNB1|IL1B|IL6|PARP1|TNF	2739/44767 genes: 6.12%
Biological Process	6	regulation of nucleic acid-templated transcription	GO:1903506	1.93e-06	0.00588	7	CAT|CDH1|CTNNB1|IL1B|IL6|PARP1|TNF	2741/44767 genes: 6.12%
Biological Process	4	regulation of cellular response to oxidative stress	GO:1900407	1.95e-06	0.00594	3	CTNNB1|PARP1|TNF	94/44767 genes: 0.21%
Biological Process	5	regulation of RNA biosynthetic process	GO:2001141	1.97e-06	0.00601	7	CAT|CDH1|CTNNB1|IL1B|IL6|PARP1|TNF	2750/44767 genes: 6.14%
Biological Process	3	regulation of immune effector process	GO:0002697	1.98e-06	0.00603	4	IL1B|IL6|NOS2|TNF	362/44767 genes: 0.81%
Biological Process	3	chemokine production	GO:0032602	2.01e-06	0.00613	3	IL1B|IL6|TNF	95/44767 genes: 0.21%
Biological Process	4	regulation of chemokine production	GO:0032642	2.01e-06	0.00613	3	IL1B|IL6|TNF	95/44767 genes: 0.21%
Biological Process	3	positive regulation of cell activation	GO:0050867	2.09e-06	0.00637	4	BCL2|IL1B|IL6|TNF	367/44767 genes: 0.82%
Biological Process	5	phosphorylation	GO:0016310	2.1e-06	0.0064	6	BAX|BCL2|CASP3|IL1B|IL6|TNF	1679/44767 genes: 3.75%
Biological Process	5	ureteric bud development	GO:0001657	2.14e-06	0.00653	3	BCL2|CAT|CTNNB1	97/44767 genes: 0.22%
Biological Process	3	negative regulation of cell cycle	GO:0045786	2.18e-06	0.00665	4	BCL2|CASP3|CTNNB1|TNF	371/44767 genes: 0.83%
Biological Process	5	cell junction assembly	GO:0034329	2.2e-06	0.00672	4	BCL2|CTNNB1|IL1B|TNF	372/44767 genes: 0.83%
Biological Process	6	mesonephric epithelium development	GO:0072163	2.21e-06	0.00673	3	BCL2|CAT|CTNNB1	98/44767 genes: 0.22%
Biological Process	4	mesonephric tubule development	GO:0072164	2.21e-06	0.00673	3	BCL2|CAT|CTNNB1	98/44767 genes: 0.22%
Biological Process	2	establishment of localization	GO:0051234	2.23e-06	0.0068	8	BAX|BCL2|CDH1|CTNNB1|IL1B|IL6|NOS2|TNF	4236/44767 genes: 9.46%
Biological Process	2	production of molecular mediator involved in inflammatory response	GO:0002532	2.27e-06	0.00694	3	IL6|NOS2|TNF	99/44767 genes: 0.22%
Biological Process	3	forebrain development	GO:0030900	2.3e-06	0.00701	4	BAX|CASP3|CDH1|CTNNB1	376/44767 genes: 0.84%
Biological Process	2	ossification	GO:0001503	2.32e-06	0.00709	4	BCL2|CTNNB1|IL6|TNF	377/44767 genes: 0.84%
Biological Process	4	positive regulation of cellular catabolic process	GO:0031331	2.32e-06	0.00709	4	BAX|IL1B|IL6|TNF	377/44767 genes: 0.84%
Biological Process	2	positive regulation of developmental pigmentation	GO:0048087	2.37e-06	0.00723	2	BAX|BCL2	9/44767 genes: 0.02%
Biological Process	4	regulation of fever generation	GO:0031620	2.37e-06	0.00723	2	IL1B|TNF	9/44767 genes: 0.02%
Biological Process	4	positive regulation of RNA metabolic process	GO:0051254	2.38e-06	0.00726	6	CDH1|CTNNB1|IL1B|IL6|PARP1|TNF	1716/44767 genes: 3.83%
Biological Process	5	defense response to Gram-positive bacterium	GO:0050830	2.49e-06	0.00759	3	IL1B|IL6|TNF	102/44767 genes: 0.23%
Biological Process	5	female gonad development	GO:0008585	2.49e-06	0.00759	3	BAX|BCL2|CASP3	102/44767 genes: 0.23%
Biological Process	5	mesonephros development	GO:0001823	2.49e-06	0.00759	3	BCL2|CAT|CTNNB1	102/44767 genes: 0.23%
Biological Process	7	monocarboxylic acid transport	GO:0015718	2.49e-06	0.00759	3	IL1B|NOS2|TNF	102/44767 genes: 0.23%
Biological Process	4	leukocyte cell-cell adhesion	GO:0007159	2.52e-06	0.0077	4	CASP3|IL1B|IL6|TNF	385/44767 genes: 0.86%
Biological Process	4	regulation of response to oxidative stress	GO:1902882	2.56e-06	0.00782	3	CTNNB1|PARP1|TNF	103/44767 genes: 0.23%
Biological Process	1	cellular process	GO:0009987	2.59e-06	0.00789	12	BAX|BCL2|CASP3|CAT|CDH1|CTNNB1|GSR|IL1B|IL6|NOS2|PARP1|TNF	15327/44767 genes: 34.24%
Biological Process	3	regulation of anatomical structure morphogenesis	GO:0022603	2.6e-06	0.00794	5	CDH1|CTNNB1|IL1B|IL6|TNF	924/44767 genes: 2.06%
Biological Process	4	lymphocyte differentiation	GO:0030098	2.6e-06	0.00794	4	BAX|BCL2|CTNNB1|IL6	388/44767 genes: 0.87%
Biological Process	4	nitrogen compound transport	GO:0071705	2.65e-06	0.00809	6	BAX|CDH1|IL1B|IL6|NOS2|TNF	1748/44767 genes: 3.90%
Biological Process	3	regulation of membrane potential	GO:0042391	2.68e-06	0.00819	4	BAX|BCL2|PARP1|TNF	391/44767 genes: 0.87%
Biological Process	6	DNA-templated transcription	GO:0006351	2.7e-06	0.00824	7	CAT|CDH1|CTNNB1|IL1B|IL6|PARP1|TNF	2882/44767 genes: 6.44%
Biological Process	5	nucleic acid-templated transcription	GO:0097659	2.71e-06	0.00828	7	CAT|CDH1|CTNNB1|IL1B|IL6|PARP1|TNF	2884/44767 genes: 6.44%
Biological Process	5	positive regulation of adaptive immune response based on somatic recombination of immune receptors built from immunoglobulin superfamily domains	GO:0002824	2.72e-06	0.00829	3	IL1B|IL6|TNF	105/44767 genes: 0.23%
Biological Process	4	development of primary female sexual characteristics	GO:0046545	2.79e-06	0.00853	3	BAX|BCL2|CASP3	106/44767 genes: 0.24%
Biological Process	5	RNA biosynthetic process	GO:0032774	2.82e-06	0.00861	7	CAT|CDH1|CTNNB1|IL1B|IL6|PARP1|TNF	2901/44767 genes: 6.48%
Biological Process	5	positive regulation of protein modification process	GO:0031401	2.87e-06	0.00877	5	BCL2|CTNNB1|IL1B|IL6|TNF	943/44767 genes: 2.11%
Biological Process	4	regulation of epithelial to mesenchymal transition	GO:0010717	2.88e-06	0.00877	3	CTNNB1|IL1B|IL6	107/44767 genes: 0.24%
Biological Process	1	biological regulation	GO:0065007	2.88e-06	0.00878	11	BAX|BCL2|CASP3|CAT|CDH1|CTNNB1|IL1B|IL6|NOS2|PARP1|TNF	11477/44767 genes: 25.64%
Biological Process	4	myeloid cell differentiation	GO:0030099	2.91e-06	0.00887	4	CASP3|CTNNB1|PARP1|TNF	399/44767 genes: 0.89%
Biological Process	5	positive regulation of lymphocyte mediated immunity	GO:0002708	2.96e-06	0.00902	3	IL1B|IL6|TNF	108/44767 genes: 0.24%
Biological Process	3	positive regulation of cell population proliferation	GO:0008284	3e-06	0.00914	5	BCL2|CTNNB1|IL1B|IL6|TNF	951/44767 genes: 2.12%
Biological Process	4	limbic system development	GO:0021761	3.04e-06	0.00927	3	BAX|CASP3|CTNNB1	109/44767 genes: 0.24%
Biological Process	4	positive regulation of macromolecule biosynthetic process	GO:0010557	3.11e-06	0.00949	6	CDH1|CTNNB1|IL1B|IL6|PARP1|TNF	1797/44767 genes: 4.01%
Biological Process	3	cellular macromolecule metabolic process	GO:0044260	3.15e-06	0.00961	7	BAX|BCL2|CAT|CTNNB1|IL6|PARP1|TNF	2949/44767 genes: 6.59%
Biological Process	5	acute inflammatory response	GO:0002526	3.21e-06	0.0098	3	IL1B|IL6|TNF	111/44767 genes: 0.25%
Biological Process	4	glial cell development	GO:0021782	3.21e-06	0.0098	3	IL1B|IL6|TNF	111/44767 genes: 0.25%
Biological Process	4	positive regulation of adaptive immune response	GO:0002821	3.21e-06	0.0098	3	IL1B|IL6|TNF	111/44767 genes: 0.25%
Biological Process	4	regulation of cell migration	GO:0030334	3.22e-06	0.00981	5	BCL2|CDH1|IL1B|IL6|TNF	965/44767 genes: 2.16%
Biological Process	4	neuron development	GO:0048666	3.23e-06	0.00986	5	BCL2|CASP3|CDH1|CTNNB1|IL6	966/44767 genes: 2.16%
Cellular Component	2	cytoplasm	GO:0005737	5.39e-08	0.000165	12	BAX|BCL2|CASP3|CAT|CDH1|CTNNB1|GSR|IL1B|IL6|NOS2|PARP1|TNF	11103/44767 genes: 24.80%
Cellular Component	4	intracellular membrane-bounded organelle	GO:0043231	6.18e-08	0.000189	12	BAX|BCL2|CASP3|CAT|CDH1|CTNNB1|GSR|IL1B|IL6|NOS2|PARP1|TNF	11230/44767 genes: 25.09%
Cellular Component	3	membrane-bounded organelle	GO:0043227	1.03e-07	0.000315	12	BAX|BCL2|CASP3|CAT|CDH1|CTNNB1|GSR|IL1B|IL6|NOS2|PARP1|TNF	11720/44767 genes: 26.18%
Cellular Component	2	membrane protein complex	GO:0098796	1.85e-07	0.000566	6	BAX|BCL2|CASP3|CDH1|CTNNB1|IL6	1109/44767 genes: 2.48%
Cellular Component	3	intracellular organelle	GO:0043229	2.16e-07	0.000658	12	BAX|BCL2|CASP3|CAT|CDH1|CTNNB1|GSR|IL1B|IL6|NOS2|PARP1|TNF	12462/44767 genes: 27.84%
Cellular Component	2	organelle	GO:0043226	3.01e-07	0.00092	12	BAX|BCL2|CASP3|CAT|CDH1|CTNNB1|GSR|IL1B|IL6|NOS2|PARP1|TNF	12814/44767 genes: 28.62%
Cellular Component	2	cytosol	GO:0005829	5.96e-07	0.00182	9	BAX|BCL2|CASP3|CAT|CTNNB1|GSR|IL1B|NOS2|PARP1	5191/44767 genes: 11.60%
Cellular Component	2	cell periphery	GO:0071944	8.49e-07	0.00259	9	BAX|CASP3|CAT|CDH1|CTNNB1|GSR|IL6|NOS2|TNF	5408/44767 genes: 12.08%
Cellular Component	2	intracellular anatomical structure	GO:0005622	9.73e-07	0.00297	12	BAX|BCL2|CASP3|CAT|CDH1|CTNNB1|GSR|IL1B|IL6|NOS2|PARP1|TNF	14128/44767 genes: 31.56%
Cellular Component	4	membrane raft	GO:0045121	1.2e-06	0.00365	4	CASP3|CDH1|CTNNB1|TNF	319/44767 genes: 0.71%
Cellular Component	3	membrane microdomain	GO:0098857	1.21e-06	0.0037	4	CASP3|CDH1|CTNNB1|TNF	320/44767 genes: 0.71%
Cellular Component	4	catenin complex	GO:0016342	1.84e-06	0.00562	2	CDH1|CTNNB1	8/44767 genes: 0.02%
Cellular Component	4	flotillin complex	GO:0016600	2.37e-06	0.00723	2	CDH1|CTNNB1	9/44767 genes: 0.02%
Cellular Component	2	endomembrane system	GO:0012505	3.17e-06	0.00967	8	BAX|BCL2|CAT|CDH1|IL1B|IL6|PARP1|TNF	4436/44767 genes: 9.91%
Molecular Function	3	enzyme binding	GO:0019899	1.39e-07	0.000425	7	BCL2|CASP3|CAT|CDH1|CTNNB1|PARP1|TNF	1860/44767 genes: 4.15%
Molecular Function	3	identical protein binding	GO:0042802	2.18e-07	0.000664	7	BAX|BCL2|CAT|CDH1|NOS2|PARP1|TNF	1986/44767 genes: 4.44%
Molecular Function	4	cytokine receptor binding	GO:0005126	2.53e-07	0.000772	4	CASP3|IL1B|IL6|TNF	216/44767 genes: 0.48%
Molecular Function	4	NADP binding	GO:0050661	2.86e-07	0.000874	3	CAT|GSR|NOS2	50/44767 genes: 0.11%
Molecular Function	5	BH3 domain binding	GO:0051434	9.87e-07	0.00301	2	BAX|BCL2	6/44767 genes: 0.01%
Molecular Function	4	BH domain binding	GO:0051400	2.37e-06	0.00723	2	BAX|BCL2	9/44767 genes: 0.02%
Molecular Function	4	death domain binding	GO:0070513	2.96e-06	0.00903	2	BAX|BCL2	10/44767 genes: 0.02%
