# Supplementary material for: Pharmacogenomic Landscape of Ivermectin and Selective Antioxidants: Exploring Gene Interplay in the Context of Long COVID
Source: MDPI journal article supplement (doi:10.3390/ijms242015471), 2023-10-23
Supplement: s1 [file Table S3.xlsx]

## Sheet: CTD_analyzer_pathway_2022082614
Table S3. Gene Set Analyzer: Enriched pathways from 12 genes
Pathway	Pathway ID	P-value	Corrected P-value	Annotated Genes Quantity	Annotated Genes	Genome Frequency
Tuberculosis	KEGG:hsa05152	1.09e-14	2.93e-12	7	BAX|BCL2|CASP3|IL1B|IL6|NOS2|TNF	178/44767 genes: 0.40%
AGE-RAGE signaling pathway in diabetic complications	KEGG:hsa04933	9.17e-14	2.47e-11	6	BAX|BCL2|CASP3|IL1B|IL6|TNF	99/44767 genes: 0.22%
Amyotrophic lateral sclerosis (ALS)	KEGG:hsa05014	1.23e-12	3.33e-10	5	BAX|BCL2|CASP3|CAT|TNF	51/44767 genes: 0.11%
Pathways in cancer	KEGG:hsa05200	3.01e-12	8.13e-10	7	BAX|BCL2|CASP3|CDH1|CTNNB1|IL6|NOS2	395/44767 genes: 0.88%
Pertussis	KEGG:hsa05133	9.68e-12	2.61e-09	5	CASP3|IL1B|IL6|NOS2|TNF	76/44767 genes: 0.17%
Amoebiasis	KEGG:hsa05146	3.03e-11	8.17e-09	5	CASP3|IL1B|IL6|NOS2|TNF	95/44767 genes: 0.21%
Interleukin-4 and 13 signaling	REACT:R-HSA-6785807	7.65e-11	2.07e-08	5	BCL2|IL1B|IL6|NOS2|TNF	114/44767 genes: 0.25%
Apoptosis	KEGG:hsa04210	2.01e-10	5.44e-08	5	BAX|BCL2|CASP3|PARP1|TNF	138/44767 genes: 0.31%
Immune System	REACT:R-HSA-168256	2.26e-10	6.1e-08	9	BCL2|CASP3|CAT|CDH1|CTNNB1|IL1B|IL6|NOS2|TNF	2118/44767 genes: 4.73%
Hepatitis B	KEGG:hsa05161	2.5e-10	6.74e-08	5	BAX|BCL2|CASP3|IL6|TNF	144/44767 genes: 0.32%
Non-alcoholic fatty liver disease (NAFLD)	KEGG:hsa04932	2.97e-10	8.01e-08	5	BAX|CASP3|IL1B|IL6|TNF	149/44767 genes: 0.33%
Apoptosis	REACT:R-HSA-109581	6.12e-10	1.65e-07	5	BAX|BCL2|CASP3|CDH1|CTNNB1	172/44767 genes: 0.38%
Programmed Cell Death	REACT:R-HSA-5357801	6.68e-10	1.8e-07	5	BAX|BCL2|CASP3|CDH1|CTNNB1	175/44767 genes: 0.39%
Legionellosis	KEGG:hsa05134	1e-09	2.7e-07	4	CASP3|IL1B|IL6|TNF	55/44767 genes: 0.12%
Colorectal cancer	KEGG:hsa05210	1.43e-09	3.86e-07	4	BAX|BCL2|CASP3|CTNNB1	60/44767 genes: 0.13%
Signaling by Interleukins	REACT:R-HSA-449147	2.28e-09	6.15e-07	6	BCL2|CASP3|IL1B|IL6|NOS2|TNF	528/44767 genes: 1.18%
Apoptotic cleavage of cell adhesion proteins	REACT:R-HSA-351906	2.42e-09	6.55e-07	3	CASP3|CDH1|CTNNB1	11/44767 genes: 0.02%
IL-17 signaling pathway	KEGG:hsa04657	8.53e-09	2.3e-06	4	CASP3|IL1B|IL6|TNF	93/44767 genes: 0.21%
NF-kappa B signaling pathway	KEGG:hsa04064	8.91e-09	2.4e-06	4	BCL2|IL1B|PARP1|TNF	94/44767 genes: 0.21%
Chagas disease (American trypanosomiasis)	KEGG:hsa05142	1.24e-08	3.35e-06	4	IL1B|IL6|NOS2|TNF	102/44767 genes: 0.23%
TNF signaling pathway	KEGG:hsa04668	1.56e-08	4.22e-06	4	CASP3|IL1B|IL6|TNF	108/44767 genes: 0.24%
Toxoplasmosis	KEGG:hsa05145	1.88e-08	5.06e-06	4	BCL2|CASP3|NOS2|TNF	113/44767 genes: 0.25%
Cytokine Signaling in Immune system	REACT:R-HSA-1280215	1.99e-08	5.37e-06	6	BCL2|CASP3|IL1B|IL6|NOS2|TNF	760/44767 genes: 1.70%
Fluid shear stress and atherosclerosis	KEGG:hsa05418	4.71e-08	1.27e-05	4	BCL2|CTNNB1|IL1B|TNF	142/44767 genes: 0.32%
Antifolate resistance	KEGG:hsa01523	6.59e-08	1.78e-05	3	IL1B|IL6|TNF	31/44767 genes: 0.07%
Apoptosis - multiple species	KEGG:hsa04215	7.99e-08	2.16e-05	3	BAX|BCL2|CASP3	33/44767 genes: 0.07%
African trypanosomiasis	KEGG:hsa05143	8.76e-08	2.37e-05	3	IL1B|IL6|TNF	34/44767 genes: 0.08%
Prion diseases	KEGG:hsa05020	9.58e-08	2.59e-05	3	BAX|IL1B|IL6	35/44767 genes: 0.08%
NOD-like receptor signaling pathway	KEGG:hsa04621	9.7e-08	2.62e-05	4	BCL2|IL1B|IL6|TNF	170/44767 genes: 0.38%
Apoptotic cleavage of cellular proteins	REACT:R-HSA-111465	1.34e-07	3.61e-05	3	CASP3|CDH1|CTNNB1	39/44767 genes: 0.09%
Herpes simplex infection	KEGG:hsa05168	1.36e-07	3.68e-05	4	CASP3|IL1B|IL6|TNF	185/44767 genes: 0.41%
Graft-versus-host disease	KEGG:hsa05332	1.56e-07	4.21e-05	3	IL1B|IL6|TNF	41/44767 genes: 0.09%
Intrinsic Pathway for Apoptosis	REACT:R-HSA-109606	1.94e-07	5.23e-05	3	BAX|BCL2|CASP3	44/44767 genes: 0.10%
Interleukin-10 signaling	REACT:R-HSA-6783783	2.69e-07	7.27e-05	3	IL1B|IL6|TNF	49/44767 genes: 0.11%
Malaria	KEGG:hsa05144	2.69e-07	7.27e-05	3	IL1B|IL6|TNF	49/44767 genes: 0.11%
Apoptotic execution phase	REACT:R-HSA-75153	3.42e-07	9.24e-05	3	CASP3|CDH1|CTNNB1	53/44767 genes: 0.12%
HTLV-I infection	KEGG:hsa05166	4.99e-07	0.000135	4	BAX|CTNNB1|IL6|TNF	256/44767 genes: 0.57%
Inflammatory bowel disease (IBD)	KEGG:hsa05321	6.37e-07	0.000172	3	IL1B|IL6|TNF	65/44767 genes: 0.15%
Leishmaniasis	KEGG:hsa05140	8.68e-07	0.000234	3	IL1B|NOS2|TNF	72/44767 genes: 0.16%
Platinum drug resistance	KEGG:hsa01524	9.06e-07	0.000244	3	BAX|BCL2|CASP3	73/44767 genes: 0.16%
EGFR tyrosine kinase inhibitor resistance	KEGG:hsa01521	1.15e-06	0.000311	3	BAX|BCL2|IL6	79/44767 genes: 0.18%
Salmonella infection	KEGG:hsa05132	1.49e-06	0.000402	3	IL1B|IL6|NOS2	86/44767 genes: 0.19%
Rheumatoid arthritis	KEGG:hsa05323	1.65e-06	0.000445	3	IL1B|IL6|TNF	89/44767 genes: 0.20%
Hematopoietic cell lineage	KEGG:hsa04640	2.07e-06	0.00056	3	IL1B|IL6|TNF	96/44767 genes: 0.21%
InlA-mediated entry of Listeria monocytogenes into host cells	REACT:R-HSA-8876493	2.37e-06	0.00064	2	CDH1|CTNNB1	9/44767 genes: 0.02%
HIF-1 signaling pathway	KEGG:hsa04066	2.42e-06	0.000652	3	BCL2|IL6|NOS2	101/44767 genes: 0.23%
Toll-like receptor signaling pathway	KEGG:hsa04620	2.64e-06	0.000713	3	IL1B|IL6|TNF	104/44767 genes: 0.23%
Sphingolipid signaling pathway	KEGG:hsa04071	3.86e-06	0.00104	3	BAX|BCL2|TNF	118/44767 genes: 0.26%
RHO GTPases activate IQGAPs	REACT:R-HSA-5626467	5.13e-06	0.00138	2	CDH1|CTNNB1	13/44767 genes: 0.03%
Alzheimer's disease	KEGG:hsa05010	1.17e-05	0.00317	3	CASP3|IL1B|TNF	171/44767 genes: 0.38%
Influenza A	KEGG:hsa05164	1.22e-05	0.00328	3	IL1B|IL6|TNF	173/44767 genes: 0.39%
Listeria monocytogenes entry into host cells	REACT:R-HSA-8876384	1.25e-05	0.00337	2	CDH1|CTNNB1	20/44767 genes: 0.04%
Innate Immune System	REACT:R-HSA-168249	1.36e-05	0.00367	5	BCL2|CAT|CTNNB1|IL1B|NOS2	1298/44767 genes: 2.90%
Proteoglycans in cancer	KEGG:hsa05205	1.96e-05	0.0053	3	CASP3|CTNNB1|TNF	203/44767 genes: 0.45%
Signal Transduction	REACT:R-HSA-162582	2.53e-05	0.00684	6	CASP3|CDH1|CTNNB1|IL6|PARP1|TNF	2588/44767 genes: 5.78%
Thyroid cancer	KEGG:hsa05216	2.66e-05	0.00719	2	CDH1|CTNNB1	29/44767 genes: 0.06%
Adherens junctions interactions	REACT:R-HSA-418990	3.05e-05	0.00823	2	CDH1|CTNNB1	31/44767 genes: 0.07%
