# Supplementary material for: Pharmacogenomic Landscape of Ivermectin and Selective Antioxidants: Exploring Gene Interplay in the Context of Long COVID
Source: MDPI journal article supplement (doi:10.3390/ijms242015471), 2023-10-23
Supplement: s1 [file Table S4.xlsx]

## Sheet: CTD_analyzer_disease_2022082614
Table S4. Gene Set Analyzer: Enriched diseases from 12 genes(Threshold: corrected p value < 0.01, with all disease category)
Disease Name	Disease ID	Disease Categories	P-value	Corrected P-value	Annotated Genes Quantity	Annotated Genes	Genome Frequency
Diabetes Mellitus, Experimental	MESH:D003921	Endocrine system disease|Metabolic disease	4.3e-22	3.48e-19	9	BAX|BCL2|CASP3|CAT|GSR|IL1B|IL6|NOS2|TNF	108/44767 genes: 0.24%
Ischemia	MESH:D007511	Pathology (process)	1.47e-20	1.19e-17	9	BAX|BCL2|CASP3|CAT|CTNNB1|IL1B|IL6|NOS2|TNF	158/44767 genes: 0.35%
Reperfusion Injury	MESH:D015427	Cardiovascular disease|Pathology (process)	2.89e-20	2.33e-17	9	BAX|BCL2|CASP3|CAT|IL1B|IL6|NOS2|PARP1|TNF	170/44767 genes: 0.38%
Postoperative Complications	MESH:D011183	Pathology (process)	5.98e-20	4.83e-17	9	BAX|BCL2|CASP3|CAT|IL1B|IL6|NOS2|PARP1|TNF	184/44767 genes: 0.41%
Intestinal Diseases	MESH:D007410	Digestive system disease	7.54e-20	6.09e-17	11	BAX|BCL2|CASP3|CAT|CDH1|CTNNB1|IL1B|IL6|NOS2|PARP1|TNF	658/44767 genes: 1.47%
Myocardial Infarction	MESH:D009203	Cardiovascular disease|Pathology (process)	2.29e-19	1.85e-16	8	BAX|BCL2|CASP3|CAT|IL1B|IL6|NOS2|TNF	100/44767 genes: 0.22%
Intracranial Hemorrhages	MESH:D020300	Cardiovascular disease|Nervous system disease|Pathology (process)	3.56e-19	2.88e-16	7	BAX|BCL2|CASP3|IL1B|IL6|NOS2|TNF	43/44767 genes: 0.10%
Cerebrovascular Disorders	MESH:D002561	Cardiovascular disease|Nervous system disease	3.63e-19	2.93e-16	9	BAX|BCL2|CASP3|CAT|IL1B|IL6|NOS2|PARP1|TNF	224/44767 genes: 0.50%
Colonic Diseases	MESH:D003108	Digestive system disease	1.94e-18	1.56e-15	10	BAX|BCL2|CASP3|CDH1|CTNNB1|IL1B|IL6|NOS2|PARP1|TNF	504/44767 genes: 1.13%
Male Urogenital Diseases	MESH:D052801	Urogenital disease (male)	2.42e-18	1.95e-15	12	BAX|BCL2|CASP3|CAT|CDH1|CTNNB1|GSR|IL1B|IL6|NOS2|PARP1|TNF	1529/44767 genes: 3.42%
Infarction	MESH:D007238	Pathology (process)	3.66e-18	2.96e-15	8	BAX|BCL2|CASP3|CAT|IL1B|IL6|NOS2|TNF	140/44767 genes: 0.31%
Cardiomyopathies	MESH:D009202	Cardiovascular disease	4.21e-18	3.4e-15	9	BAX|CASP3|CAT|CTNNB1|IL1B|IL6|NOS2|PARP1|TNF	293/44767 genes: 0.65%
Breast Neoplasms	MESH:D001943	Cancer|Skin disease	4.58e-18	3.7e-15	10	BAX|BCL2|CAT|CDH1|CTNNB1|IL1B|IL6|NOS2|PARP1|TNF	549/44767 genes: 1.23%
Breast Diseases	MESH:D001941	Skin disease	5.2e-18	4.2e-15	10	BAX|BCL2|CAT|CDH1|CTNNB1|IL1B|IL6|NOS2|PARP1|TNF	556/44767 genes: 1.24%
Chemically-Induced Disorders	MESH:D064419		8.31e-18	6.72e-15	11	BAX|BCL2|CASP3|CAT|CTNNB1|GSR|IL1B|IL6|NOS2|PARP1|TNF	1007/44767 genes: 2.25%
Gastrointestinal Diseases	MESH:D005767	Digestive system disease	1.73e-17	1.4e-14	11	BAX|BCL2|CASP3|CAT|CDH1|CTNNB1|IL1B|IL6|NOS2|PARP1|TNF	1076/44767 genes: 2.40%
Necrosis	MESH:D009336	Pathology (process)	3.89e-17	3.14e-14	8	BAX|BCL2|CASP3|CAT|IL1B|IL6|NOS2|TNF	187/44767 genes: 0.42%
Endocrine System Diseases	MESH:D004700	Endocrine system disease	4.64e-17	3.75e-14	11	BAX|BCL2|CASP3|CAT|CDH1|CTNNB1|GSR|IL1B|IL6|NOS2|TNF	1177/44767 genes: 2.63%
Liver Diseases	MESH:D008107	Digestive system disease	5.73e-17	4.63e-14	12	BAX|BCL2|CASP3|CAT|CDH1|CTNNB1|GSR|IL1B|IL6|NOS2|PARP1|TNF	1989/44767 genes: 4.44%
Hemorrhage	MESH:D006470	Pathology (process)	6.43e-17	5.19e-14	7	BAX|BCL2|CASP3|IL1B|IL6|NOS2|TNF	87/44767 genes: 0.19%
Diabetes Mellitus	MESH:D003920	Endocrine system disease|Metabolic disease	8.92e-17	7.21e-14	9	BAX|BCL2|CASP3|CAT|GSR|IL1B|IL6|NOS2|TNF	410/44767 genes: 0.92%
Glucose Metabolism Disorders	MESH:D044882	Metabolic disease	1.37e-16	1.11e-13	9	BAX|BCL2|CASP3|CAT|GSR|IL1B|IL6|NOS2|TNF	430/44767 genes: 0.96%
Urogenital Diseases	MESH:D000091642		1.37e-16	1.11e-13	12	BAX|BCL2|CASP3|CAT|CDH1|CTNNB1|GSR|IL1B|IL6|NOS2|PARP1|TNF	2139/44767 genes: 4.78%
Myocardial Ischemia	MESH:D017202	Cardiovascular disease	1.46e-16	1.18e-13	9	BAX|BCL2|CASP3|CAT|CTNNB1|IL1B|IL6|NOS2|TNF	433/44767 genes: 0.97%
Skin Diseases	MESH:D012871	Skin disease	1.89e-16	1.53e-13	11	BAX|BCL2|CAT|CDH1|CTNNB1|GSR|IL1B|IL6|NOS2|PARP1|TNF	1337/44767 genes: 2.99%
Lung Injury	MESH:D055370	Respiratory tract disease|Wounds and injuries	2.03e-16	1.64e-13	7	CASP3|CAT|IL1B|IL6|NOS2|PARP1|TNF	102/44767 genes: 0.23%
Brain Ischemia	MESH:D002545	Cardiovascular disease|Nervous system disease	2.67e-16	2.16e-13	7	CASP3|CAT|IL1B|IL6|NOS2|PARP1|TNF	106/44767 genes: 0.24%
Female Urogenital Diseases	MESH:D052776	Urogenital disease (female)	3e-16	2.42e-13	11	BAX|BCL2|CAT|CDH1|CTNNB1|GSR|IL1B|IL6|NOS2|PARP1|TNF	1394/44767 genes: 3.11%
Asthma	MESH:D001249	Immune system disease|Respiratory tract disease	3.06e-16	2.47e-13	7	BCL2|CAT|IL1B|IL6|NOS2|PARP1|TNF	108/44767 genes: 0.24%
Urologic Diseases	MESH:D014570	Urogenital disease (female)|Urogenital disease (male)	3.77e-16	3.05e-13	10	BAX|CAT|CDH1|CTNNB1|GSR|IL1B|IL6|NOS2|PARP1|TNF	852/44767 genes: 1.90%
Dermatitis	MESH:D003872	Skin disease	4.97e-16	4.02e-13	8	BCL2|CTNNB1|GSR|IL1B|IL6|NOS2|PARP1|TNF	256/44767 genes: 0.57%
Neoplastic Processes	MESH:D009385	Cancer|Pathology (process)	7.66e-16	6.19e-13	9	BCL2|CAT|CDH1|CTNNB1|IL1B|IL6|NOS2|PARP1|TNF	520/44767 genes: 1.16%
Female Urogenital Diseases and Pregnancy Complications	MESH:D005261		8.84e-16	7.14e-13	11	BAX|BCL2|CAT|CDH1|CTNNB1|GSR|IL1B|IL6|NOS2|PARP1|TNF	1538/44767 genes: 3.44%
Metabolic Diseases	MESH:D008659	Metabolic disease	9.22e-16	7.45e-13	11	BAX|BCL2|CASP3|CAT|CTNNB1|GSR|IL1B|IL6|NOS2|PARP1|TNF	1544/44767 genes: 3.45%
Subarachnoid Hemorrhage	MESH:D013345	Cardiovascular disease|Nervous system disease|Pathology (process)	1.06e-15	8.54e-13	5	CASP3|IL1B|IL6|NOS2|TNF	14/44767 genes: 0.03%
Lung Diseases, Obstructive	MESH:D008173	Respiratory tract disease	1.09e-15	8.84e-13	7	BCL2|CAT|IL1B|IL6|NOS2|PARP1|TNF	129/44767 genes: 0.29%
Disease Attributes	MESH:D020969	Pathology (process)	1.1e-15	8.86e-13	9	BCL2|CASP3|CAT|CDH1|CTNNB1|IL1B|IL6|NOS2|TNF	541/44767 genes: 1.21%
Infections	MESH:D007239		1.15e-15	9.31e-13	9	BAX|BCL2|CASP3|CDH1|IL1B|IL6|NOS2|PARP1|TNF	544/44767 genes: 1.22%
Respiratory Hypersensitivity	MESH:D012130	Immune system disease|Respiratory tract disease	1.16e-15	9.35e-13	7	BCL2|CAT|IL1B|IL6|NOS2|PARP1|TNF	130/44767 genes: 0.29%
Bronchial Diseases	MESH:D001982	Respiratory tract disease	1.29e-15	1.04e-12	7	BCL2|CAT|IL1B|IL6|NOS2|PARP1|TNF	132/44767 genes: 0.29%
Vascular Diseases	MESH:D014652	Cardiovascular disease	1.37e-15	1.11e-12	10	BAX|BCL2|CASP3|CAT|CTNNB1|IL1B|IL6|NOS2|PARP1|TNF	969/44767 genes: 2.16%
Poisoning	MESH:D011041		1.65e-15	1.33e-12	9	BAX|CASP3|CAT|CTNNB1|GSR|IL1B|IL6|NOS2|TNF	566/44767 genes: 1.26%
Drug-Related Side Effects and Adverse Reactions	MESH:D064420		1.78e-15	1.44e-12	9	BAX|CAT|CTNNB1|GSR|IL1B|IL6|NOS2|PARP1|TNF	571/44767 genes: 1.28%
Skin and Connective Tissue Diseases	MESH:D017437		1.91e-15	1.55e-12	11	BAX|BCL2|CAT|CDH1|CTNNB1|GSR|IL1B|IL6|NOS2|PARP1|TNF	1650/44767 genes: 3.69%
Nutritional and Metabolic Diseases	MESH:D009750		2.02e-15	1.63e-12	11	BAX|BCL2|CASP3|CAT|CTNNB1|GSR|IL1B|IL6|NOS2|PARP1|TNF	1658/44767 genes: 3.70%
Mouth Diseases	MESH:D009059	Mouth disease	2.66e-15	2.15e-12	8	CAT|CDH1|CTNNB1|IL1B|IL6|NOS2|PARP1|TNF	315/44767 genes: 0.70%
Cell Transformation, Neoplastic	MESH:D002471	Cancer|Pathology (process)	3.7e-15	2.99e-12	7	BCL2|CAT|CDH1|CTNNB1|IL6|NOS2|PARP1	153/44767 genes: 0.34%
Digestive System Diseases	MESH:D004066	Digestive system disease	3.93e-15	3.18e-12	12	BAX|BCL2|CASP3|CAT|CDH1|CTNNB1|GSR|IL1B|IL6|NOS2|PARP1|TNF	2827/44767 genes: 6.31%
Hypersensitivity	MESH:D006967	Immune system disease	4.16e-15	3.36e-12	8	BCL2|CAT|CTNNB1|IL1B|IL6|NOS2|PARP1|TNF	333/44767 genes: 0.74%
Heart Diseases	MESH:D006331	Cardiovascular disease	5.28e-15	4.26e-12	10	BAX|BCL2|CASP3|CAT|CTNNB1|IL1B|IL6|NOS2|PARP1|TNF	1109/44767 genes: 2.48%
Carcinogenesis	MESH:D063646	Cancer|Pathology (process)	7.51e-15	6.07e-12	7	BCL2|CAT|CDH1|CTNNB1|IL6|NOS2|PARP1	169/44767 genes: 0.38%
Hypersensitivity, Immediate	MESH:D006969	Immune system disease	8.87e-15	7.17e-12	7	BCL2|CAT|IL1B|IL6|NOS2|PARP1|TNF	173/44767 genes: 0.39%
Kidney Diseases	MESH:D007674	Urogenital disease (female)|Urogenital disease (male)	1.04e-14	8.38e-12	9	BAX|CAT|CDH1|CTNNB1|IL1B|IL6|NOS2|PARP1|TNF	694/44767 genes: 1.55%
Brain Diseases	MESH:D001927	Nervous system disease	1.05e-14	8.48e-12	10	BAX|BCL2|CASP3|CAT|GSR|IL1B|IL6|NOS2|PARP1|TNF	1188/44767 genes: 2.65%
Pathological Conditions, Anatomical	MESH:D020763	Pathology (anatomical condition)	2.13e-14	1.72e-11	8	CAT|CTNNB1|GSR|IL1B|IL6|NOS2|PARP1|TNF	408/44767 genes: 0.91%
Head and Neck Neoplasms	MESH:D006258	Cancer	2.54e-14	2.05e-11	8	BAX|BCL2|CDH1|CTNNB1|IL1B|IL6|NOS2|TNF	417/44767 genes: 0.93%
Colitis	MESH:D003092	Digestive system disease	2.66e-14	2.15e-11	6	CASP3|CDH1|IL1B|IL6|NOS2|TNF	81/44767 genes: 0.18%
Colorectal Neoplasms	MESH:D015179	Cancer|Digestive system disease	2.9e-14	2.35e-11	8	BAX|BCL2|CDH1|CTNNB1|IL1B|NOS2|PARP1|TNF	424/44767 genes: 0.95%
Hemic and Lymphatic Diseases	MESH:D006425		3.18e-14	2.57e-11	9	BAX|BCL2|CAT|CTNNB1|GSR|IL1B|IL6|PARP1|TNF	786/44767 genes: 1.76%
Central Nervous System Diseases	MESH:D002493	Nervous system disease	3.26e-14	2.64e-11	10	BAX|BCL2|CASP3|CAT|GSR|IL1B|IL6|NOS2|PARP1|TNF	1331/44767 genes: 2.97%
Chronic Disease	MESH:D002908	Pathology (process)	3.28e-14	2.65e-11	7	BCL2|CASP3|CAT|IL1B|IL6|NOS2|TNF	208/44767 genes: 0.46%
Stomatognathic Diseases	MESH:D009057	Mouth disease	3.7e-14	2.99e-11	8	CAT|CDH1|CTNNB1|IL1B|IL6|NOS2|PARP1|TNF	437/44767 genes: 0.98%
Intestinal Neoplasms	MESH:D007414	Cancer|Digestive system disease	4.2e-14	3.4e-11	8	BAX|BCL2|CDH1|CTNNB1|IL1B|NOS2|PARP1|TNF	444/44767 genes: 0.99%
Gastrointestinal Neoplasms	MESH:D005770	Cancer|Digestive system disease	5.14e-14	4.15e-11	9	BAX|BCL2|CDH1|CTNNB1|IL1B|IL6|NOS2|PARP1|TNF	829/44767 genes: 1.85%
Mental Disorders	MESH:D001523	Mental disorder	5.41e-14	4.37e-11	10	BAX|BCL2|CASP3|CAT|CTNNB1|IL1B|IL6|NOS2|PARP1|TNF	1400/44767 genes: 3.13%
Nerve Degeneration	MESH:D009410	Pathology (process)	5.84e-14	4.72e-11	6	BAX|BCL2|CASP3|CDH1|CTNNB1|TNF	92/44767 genes: 0.21%
Pathological Conditions, Signs and Symptoms	MESH:D013568		6.5e-14	5.25e-11	12	BAX|BCL2|CASP3|CAT|CDH1|CTNNB1|GSR|IL1B|IL6|NOS2|PARP1|TNF	3570/44767 genes: 7.97%
Diabetes Mellitus, Type 2	MESH:D003924	Endocrine system disease|Metabolic disease	6.68e-14	5.4e-11	7	BAX|BCL2|CASP3|CAT|IL6|NOS2|TNF	230/44767 genes: 0.51%
Gonadal Disorders	MESH:D006058	Endocrine system disease	6.98e-14	5.64e-11	8	BAX|BCL2|CASP3|CAT|CDH1|CTNNB1|IL6|NOS2	473/44767 genes: 1.06%
Digestive System Neoplasms	MESH:D004067	Cancer|Digestive system disease	8.62e-14	6.96e-11	10	BAX|BCL2|CAT|CDH1|CTNNB1|IL1B|IL6|NOS2|PARP1|TNF	1467/44767 genes: 3.28%
Osteoporosis, Postmenopausal	MESH:D015663	Metabolic disease|Musculoskeletal disease	1.03e-13	8.36e-11	4	CAT|IL1B|IL6|TNF	7/44767 genes: 0.02%
Cardiovascular Diseases	MESH:D002318	Cardiovascular disease	1.22e-13	9.85e-11	10	BAX|BCL2|CASP3|CAT|CTNNB1|IL1B|IL6|NOS2|PARP1|TNF	1519/44767 genes: 3.39%
Trauma, Nervous System	MESH:D020196	Nervous system disease|Wounds and injuries	1.24e-13	1e-10	6	CASP3|IL1B|IL6|NOS2|PARP1|TNF	104/44767 genes: 0.23%
Lung Diseases	MESH:D008171	Respiratory tract disease	1.25e-13	1.01e-10	9	BCL2|CASP3|CAT|CTNNB1|IL1B|IL6|NOS2|PARP1|TNF	915/44767 genes: 2.04%
Signs and Symptoms	MESH:D012816	Signs and symptoms	1.59e-13	1.28e-10	10	BCL2|CASP3|CAT|CTNNB1|GSR|IL1B|IL6|NOS2|PARP1|TNF	1560/44767 genes: 3.48%
Acute Lung Injury	MESH:D055371	Respiratory tract disease	1.71e-13	1.38e-10	5	CASP3|CAT|IL1B|IL6|TNF	35/44767 genes: 0.08%
Movement Disorders	MESH:D009069	Nervous system disease	1.82e-13	1.47e-10	7	CASP3|CAT|GSR|IL6|NOS2|PARP1|TNF	265/44767 genes: 0.59%
Pathologic Processes	MESH:D010335	Pathology (process)	1.94e-13	1.56e-10	11	BAX|BCL2|CASP3|CAT|CDH1|CTNNB1|IL1B|IL6|NOS2|PARP1|TNF	2512/44767 genes: 5.61%
Edema	MESH:D004487	Signs and symptoms	1.99e-13	1.6e-10	5	CASP3|CAT|GSR|IL6|TNF	36/44767 genes: 0.08%
Fibrosis	MESH:D005355	Pathology (process)	3.34e-13	2.7e-10	9	BCL2|CAT|CDH1|CTNNB1|IL1B|IL6|NOS2|PARP1|TNF	1021/44767 genes: 2.28%
Adenocarcinoma	MESH:D000230	Cancer	3.7e-13	2.99e-10	9	BCL2|CAT|CDH1|CTNNB1|IL1B|IL6|NOS2|PARP1|TNF	1033/44767 genes: 2.31%
Nervous System Diseases	MESH:D009422	Nervous system disease	4.24e-13	3.42e-10	11	BAX|BCL2|CASP3|CAT|CTNNB1|GSR|IL1B|IL6|NOS2|PARP1|TNF	2698/44767 genes: 6.03%
Sepsis	MESH:D018805	Pathology (process)	5.71e-13	4.62e-10	5	CASP3|IL1B|IL6|NOS2|TNF	44/44767 genes: 0.10%
Systemic Inflammatory Response Syndrome	MESH:D018746	Pathology (process)	5.71e-13	4.62e-10	5	CASP3|IL1B|IL6|NOS2|TNF	44/44767 genes: 0.10%
Respiratory Tract Diseases	MESH:D012140	Respiratory tract disease	6.83e-13	5.52e-10	9	BCL2|CASP3|CAT|CTNNB1|IL1B|IL6|NOS2|PARP1|TNF	1106/44767 genes: 2.47%
Lung Neoplasms	MESH:D008175	Cancer|Respiratory tract disease	8.68e-13	7.02e-10	8	BCL2|CAT|CTNNB1|IL1B|IL6|NOS2|PARP1|TNF	648/44767 genes: 1.45%
Respiratory Tract Neoplasms	MESH:D012142	Cancer|Respiratory tract disease	9.23e-13	7.46e-10	8	BCL2|CAT|CTNNB1|IL1B|IL6|NOS2|PARP1|TNF	653/44767 genes: 1.46%
Thoracic Neoplasms	MESH:D013899	Cancer	9.35e-13	7.55e-10	8	BCL2|CAT|CTNNB1|IL1B|IL6|NOS2|PARP1|TNF	654/44767 genes: 1.46%
Colonic Neoplasms	MESH:D003110	Cancer|Digestive system disease	1.26e-12	1.02e-09	6	BAX|BCL2|CTNNB1|IL1B|NOS2|TNF	152/44767 genes: 0.34%
Mesothelioma	MESH:D008654	Cancer	1.31e-12	1.06e-09	6	BCL2|CAT|CDH1|CTNNB1|IL6|PARP1	153/44767 genes: 0.34%
Neoplasms, Mesothelial	MESH:D018301	Cancer	1.31e-12	1.06e-09	6	BCL2|CAT|CDH1|CTNNB1|IL6|PARP1	153/44767 genes: 0.34%
Neurodegenerative Diseases	MESH:D019636	Nervous system disease	1.34e-12	1.08e-09	8	BAX|BCL2|CASP3|GSR|IL1B|IL6|PARP1|TNF	684/44767 genes: 1.53%
Lung Diseases, Interstitial	MESH:D017563	Respiratory tract disease	1.42e-12	1.15e-09	6	CAT|IL1B|IL6|NOS2|PARP1|TNF	155/44767 genes: 0.35%
Immune System Diseases	MESH:D007154	Immune system disease	1.67e-12	1.35e-09	9	BAX|BCL2|CAT|CTNNB1|IL1B|IL6|NOS2|PARP1|TNF	1222/44767 genes: 2.73%
Burns	MESH:D002056	Wounds and injuries	2.11e-12	1.71e-09	4	IL1B|IL6|NOS2|TNF	13/44767 genes: 0.03%
Gastroenteritis	MESH:D005759	Digestive system disease	2.49e-12	2.01e-09	6	CASP3|CDH1|IL1B|IL6|NOS2|TNF	170/44767 genes: 0.38%
Neurologic Manifestations	MESH:D009461	Nervous system disease|Signs and symptoms	2.49e-12	2.02e-09	9	BCL2|CASP3|CAT|CTNNB1|IL1B|IL6|NOS2|PARP1|TNF	1278/44767 genes: 2.85%
Eye Diseases	MESH:D005128	Eye disease	2.79e-12	2.25e-09	8	BCL2|CASP3|CAT|CTNNB1|IL1B|IL6|NOS2|TNF	750/44767 genes: 1.68%
Brain Injuries, Traumatic	MESH:D000070642	Nervous system disease|Wounds and injuries	2.96e-12	2.39e-09	4	IL1B|NOS2|PARP1|TNF	14/44767 genes: 0.03%
Carcinoma	MESH:D002277	Cancer	3.99e-12	3.23e-09	9	BCL2|CAT|CDH1|CTNNB1|IL1B|IL6|NOS2|PARP1|TNF	1347/44767 genes: 3.01%
Psoriasis	MESH:D011565	Skin disease	4e-12	3.23e-09	5	CAT|IL1B|IL6|NOS2|TNF	64/44767 genes: 0.14%
Inflammation	MESH:D007249	Pathology (process)	4.02e-12	3.25e-09	6	CASP3|IL1B|IL6|NOS2|PARP1|TNF	184/44767 genes: 0.41%
Chemical and Drug Induced Liver Injury	MESH:D056486	Digestive system disease	4.33e-12	3.5e-09	7	BAX|CAT|CTNNB1|GSR|IL1B|IL6|TNF	416/44767 genes: 0.93%
Parasitic Diseases	MESH:D010272	Parasitic disease	4.33e-12	3.5e-09	5	BCL2|IL1B|IL6|NOS2|TNF	65/44767 genes: 0.15%
Genital Diseases	MESH:D000091662		4.53e-12	3.66e-09	9	BAX|BCL2|CASP3|CDH1|CTNNB1|IL1B|IL6|PARP1|TNF	1366/44767 genes: 3.05%
Neoplasms by Histologic Type	MESH:D009370	Cancer	5.43e-12	4.39e-09	10	BAX|BCL2|CAT|CDH1|CTNNB1|IL1B|IL6|NOS2|PARP1|TNF	2225/44767 genes: 4.97%
Seizures	MESH:D012640	Nervous system disease|Signs and symptoms	5.54e-12	4.48e-09	6	CASP3|CAT|IL1B|IL6|NOS2|TNF	194/44767 genes: 0.43%
Skin Diseases, Papulosquamous	MESH:D017444	Skin disease	6.82e-12	5.51e-09	5	CAT|IL1B|IL6|NOS2|TNF	71/44767 genes: 0.16%
Biliary Tract Diseases	MESH:D001660	Digestive system disease	7.97e-12	6.44e-09	6	BCL2|CAT|IL1B|IL6|NOS2|TNF	206/44767 genes: 0.46%
Neoplasm Invasiveness	MESH:D009361	Cancer|Pathology (process)	8.21e-12	6.63e-09	6	CAT|CDH1|CTNNB1|IL1B|IL6|TNF	207/44767 genes: 0.46%
Stomach Ulcer	MESH:D013276	Digestive system disease	9.03e-12	7.3e-09	4	CAT|IL1B|NOS2|TNF	18/44767 genes: 0.04%
Basal Ganglia Diseases	MESH:D001480	Nervous system disease	9.48e-12	7.66e-09	6	CASP3|GSR|IL6|NOS2|PARP1|TNF	212/44767 genes: 0.47%
Wounds and Injuries	MESH:D014947	Wounds and injuries	1.09e-11	8.82e-09	6	CASP3|IL1B|IL6|NOS2|PARP1|TNF	217/44767 genes: 0.48%
Brain Injuries	MESH:D001930	Nervous system disease|Wounds and injuries	1.11e-11	8.93e-09	5	IL1B|IL6|NOS2|PARP1|TNF	78/44767 genes: 0.17%
Liver Cirrhosis	MESH:D008103	Digestive system disease|Pathology (process)	1.16e-11	9.39e-09	8	BCL2|CAT|CDH1|CTNNB1|IL1B|IL6|NOS2|TNF	897/44767 genes: 2.00%
Adenoma	MESH:D000236	Cancer	1.19e-11	9.58e-09	6	BCL2|CAT|CDH1|CTNNB1|IL6|PARP1	220/44767 genes: 0.49%
Disease Progression	MESH:D018450	Pathology (process)	1.22e-11	9.85e-09	6	BCL2|CAT|CDH1|CTNNB1|IL1B|TNF	221/44767 genes: 0.49%
Neurocognitive Disorders	MESH:D019965	Mental disorder	1.4e-11	1.13e-08	6	BAX|BCL2|CASP3|IL1B|IL6|TNF	226/44767 genes: 0.50%
Mycoplasma Infections	MESH:D009175	Bacterial infection or mycosis	1.47e-11	1.19e-08	3	CASP3|CDH1|NOS2	3/44767 genes: 0.01%
Mycoplasmatales Infections	MESH:D009180	Bacterial infection or mycosis	1.47e-11	1.19e-08	3	CASP3|CDH1|NOS2	3/44767 genes: 0.01%
Craniocerebral Trauma	MESH:D006259	Nervous system disease|Wounds and injuries	1.72e-11	1.39e-08	5	IL1B|IL6|NOS2|PARP1|TNF	85/44767 genes: 0.19%
Neoplasms, Glandular and Epithelial	MESH:D009375	Cancer	1.89e-11	1.53e-08	9	BCL2|CAT|CDH1|CTNNB1|IL1B|IL6|NOS2|PARP1|TNF	1603/44767 genes: 3.58%
Bone Diseases	MESH:D001847	Musculoskeletal disease	2.18e-11	1.76e-08	7	BCL2|CAT|IL1B|IL6|NOS2|PARP1|TNF	524/44767 genes: 1.17%
Hypertension	MESH:D006973	Cardiovascular disease	2.27e-11	1.84e-08	6	BCL2|CAT|IL1B|IL6|NOS2|TNF	245/44767 genes: 0.55%
Pneumonia	MESH:D011014	Respiratory tract disease	2.72e-11	2.19e-08	5	IL1B|IL6|NOS2|PARP1|TNF	93/44767 genes: 0.21%
Calcium Metabolism Disorders	MESH:D002128	Metabolic disease	3.03e-11	2.45e-08	5	CASP3|CTNNB1|IL1B|IL6|TNF	95/44767 genes: 0.21%
Duodenal Diseases	MESH:D004378	Digestive system disease	3.73e-11	3.01e-08	4	CAT|IL1B|NOS2|TNF	25/44767 genes: 0.06%
Peptic Ulcer	MESH:D010437	Digestive system disease	3.73e-11	3.01e-08	4	CAT|IL1B|NOS2|TNF	25/44767 genes: 0.06%
Nutrition Disorders	MESH:D009748	Nutrition disorder	4.56e-11	3.68e-08	6	CAT|GSR|IL1B|IL6|PARP1|TNF	275/44767 genes: 0.61%
Alzheimer Disease	MESH:D000544	Mental disorder|Nervous system disease	5.29e-11	4.27e-08	5	BAX|BCL2|CASP3|IL1B|TNF	106/44767 genes: 0.24%
Hepatitis	MESH:D006505	Digestive system disease	5.55e-11	4.48e-08	5	CASP3|CAT|IL6|PARP1|TNF	107/44767 genes: 0.24%
Pulmonary Fibrosis	MESH:D011658	Pathology (process)|Respiratory tract disease	5.55e-11	4.48e-08	5	CAT|IL1B|IL6|PARP1|TNF	107/44767 genes: 0.24%
HIV Wasting Syndrome	MESH:D019247	Immune system disease|Metabolic disease|Nutrition disorder|Viral disease	5.88e-11	4.75e-08	3	IL1B|IL6|TNF	4/44767 genes: 0.01%
Wasting Syndrome	MESH:D019282	Metabolic disease|Nutrition disorder	5.88e-11	4.75e-08	3	IL1B|IL6|TNF	4/44767 genes: 0.01%
Liver Neoplasms, Experimental	MESH:D008114	Cancer|Digestive system disease	6.68e-11	5.4e-08	5	BCL2|CDH1|CTNNB1|IL6|TNF	111/44767 genes: 0.25%
Tauopathies	MESH:D024801	Nervous system disease	6.99e-11	5.65e-08	5	BAX|BCL2|CASP3|IL1B|TNF	112/44767 genes: 0.25%
HIV Infections	MESH:D015658	Immune system disease|Viral disease	8e-11	6.46e-08	5	BAX|BCL2|IL1B|IL6|TNF	115/44767 genes: 0.26%
Inflammatory Bowel Diseases	MESH:D015212	Digestive system disease	8e-11	6.46e-08	5	CASP3|CDH1|IL1B|IL6|TNF	115/44767 genes: 0.26%
Liver Cirrhosis, Alcoholic	MESH:D008104	Digestive system disease|Pathology (process)|Substance-related disorder	8.08e-11	6.53e-08	4	BCL2|CAT|IL6|TNF	30/44767 genes: 0.07%
Rectal Diseases	MESH:D012002	Digestive system disease	8.17e-11	6.6e-08	6	BAX|BCL2|CDH1|CTNNB1|PARP1|TNF	303/44767 genes: 0.68%
Lentivirus Infections	MESH:D016180	Viral disease	9.12e-11	7.36e-08	5	BAX|BCL2|IL1B|IL6|TNF	118/44767 genes: 0.26%
Retroviridae Infections	MESH:D012192	Viral disease	9.12e-11	7.36e-08	5	BAX|BCL2|IL1B|IL6|TNF	118/44767 genes: 0.26%
Ureteral Diseases	MESH:D014515	Urogenital disease (female)|Urogenital disease (male)	9.27e-11	7.49e-08	4	CAT|CDH1|GSR|NOS2	31/44767 genes: 0.07%
Neoplasms by Site	MESH:D009371	Cancer	1.01e-10	8.17e-08	10	BAX|BCL2|CAT|CDH1|CTNNB1|IL1B|IL6|NOS2|PARP1|TNF	2989/44767 genes: 6.68%
Cholestasis, Extrahepatic	MESH:D001651	Digestive system disease	1.06e-10	8.56e-08	4	IL1B|IL6|NOS2|TNF	32/44767 genes: 0.07%
Neurotoxicity Syndromes	MESH:D020258	Nervous system disease	1.32e-10	1.07e-07	5	CASP3|CAT|IL1B|NOS2|TNF	127/44767 genes: 0.28%
Stomach Diseases	MESH:D013272	Digestive system disease	1.39e-10	1.12e-07	6	CAT|CDH1|IL1B|IL6|NOS2|TNF	331/44767 genes: 0.74%
Immunoproliferative Disorders	MESH:D007160	Immune system disease	1.47e-10	1.19e-07	6	BAX|BCL2|CAT|CTNNB1|IL6|PARP1	334/44767 genes: 0.75%
Lymphoproliferative Disorders	MESH:D008232	Immune system disease|Lymphatic disease	1.78e-10	1.44e-07	6	BAX|BCL2|CAT|CTNNB1|IL6|PARP1	345/44767 genes: 0.77%
Liver Neoplasms	MESH:D008113	Cancer|Digestive system disease	1.79e-10	1.45e-07	7	BCL2|CAT|CDH1|CTNNB1|IL6|PARP1|TNF	709/44767 genes: 1.58%
Parkinsonian Disorders	MESH:D020734	Nervous system disease	1.8e-10	1.46e-07	5	GSR|IL6|NOS2|PARP1|TNF	135/44767 genes: 0.30%
Gram-Negative Bacterial Infections	MESH:D016905	Bacterial infection or mycosis	1.94e-10	1.57e-07	4	CASP3|CDH1|NOS2|TNF	37/44767 genes: 0.08%
Liver Diseases, Alcoholic	MESH:D008108	Digestive system disease|Substance-related disorder	2.42e-10	1.96e-07	4	BCL2|CAT|IL6|TNF	39/44767 genes: 0.09%
Neurodevelopmental Disorders	MESH:D065886	Mental disorder	2.68e-10	2.16e-07	7	BCL2|CAT|CTNNB1|IL1B|IL6|NOS2|PARP1	751/44767 genes: 1.68%
Arthritis, Experimental	MESH:D001169	Musculoskeletal disease	2.69e-10	2.17e-07	4	CAT|IL1B|IL6|TNF	40/44767 genes: 0.09%
Heart Failure	MESH:D006333	Cardiovascular disease	3.17e-10	2.56e-07	5	CAT|IL1B|IL6|NOS2|TNF	151/44767 genes: 0.34%
Genital Diseases, Male	MESH:D005832	Urogenital disease (male)	3.98e-10	3.21e-07	7	BAX|BCL2|CASP3|CDH1|CTNNB1|IL6|PARP1	795/44767 genes: 1.78%
Protozoan Infections	MESH:D011528	Parasitic disease	3.99e-10	3.23e-07	4	IL1B|IL6|NOS2|TNF	44/44767 genes: 0.10%
Blood-Borne Infections	MESH:D000086982	Pathology (process)	4.25e-10	3.43e-07	5	BAX|BCL2|IL1B|IL6|TNF	160/44767 genes: 0.36%
Communicable Diseases	MESH:D003141	Pathology (process)	4.25e-10	3.43e-07	5	BAX|BCL2|IL1B|IL6|TNF	160/44767 genes: 0.36%
Genetic Diseases, Inborn	MESH:D030342	Genetic disease (inborn)	4.29e-10	3.47e-07	9	BCL2|CASP3|CAT|CTNNB1|IL1B|IL6|NOS2|PARP1|TNF	2277/44767 genes: 5.09%
Body Temperature Changes	MESH:D001832	Signs and symptoms	4.38e-10	3.54e-07	4	IL1B|IL6|NOS2|TNF	45/44767 genes: 0.10%
Renal Insufficiency	MESH:D051437	Urogenital disease (female)|Urogenital disease (male)	4.81e-10	3.89e-07	5	BAX|CAT|IL6|NOS2|TNF	164/44767 genes: 0.37%
Pleurisy	MESH:D010998	Respiratory tract disease	5.15e-10	4.16e-07	3	IL1B|IL6|TNF	7/44767 genes: 0.02%
Anemia	MESH:D000740	Blood disease	5.44e-10	4.39e-07	5	GSR|IL1B|IL6|PARP1|TNF	168/44767 genes: 0.38%
Cholestasis	MESH:D002779	Digestive system disease	6.12e-10	4.94e-07	5	CAT|IL1B|IL6|NOS2|TNF	172/44767 genes: 0.38%
Thyroid Diseases	MESH:D013959	Endocrine system disease	6.12e-10	4.94e-07	5	CAT|GSR|IL1B|IL6|TNF	172/44767 genes: 0.38%
Alcohol-Induced Disorders	MESH:D020751	Substance-related disorder	6.77e-10	5.47e-07	4	BCL2|CAT|IL6|TNF	50/44767 genes: 0.11%
Dementia	MESH:D003704	Mental disorder|Nervous system disease	6.87e-10	5.55e-07	5	BAX|BCL2|CASP3|IL1B|TNF	176/44767 genes: 0.39%
Respiratory Tract Infections	MESH:D012141	Respiratory tract disease	7.07e-10	5.71e-07	5	IL1B|IL6|NOS2|PARP1|TNF	177/44767 genes: 0.40%
Pneumoconiosis	MESH:D011009	Occupational disease|Respiratory tract disease	7.34e-10	5.93e-07	4	IL1B|IL6|NOS2|TNF	51/44767 genes: 0.11%
Skin Diseases, Vascular	MESH:D017445	Skin disease	7.95e-10	6.43e-07	4	CAT|IL1B|NOS2|TNF	52/44767 genes: 0.12%
Spinal Diseases	MESH:D013122	Musculoskeletal disease	7.95e-10	6.43e-07	4	IL6|NOS2|PARP1|TNF	52/44767 genes: 0.12%
Musculoskeletal Diseases	MESH:D009140	Musculoskeletal disease	8.05e-10	6.5e-07	8	BCL2|CAT|CTNNB1|IL1B|IL6|NOS2|PARP1|TNF	1531/44767 genes: 3.42%
Polymyositis	MESH:D017285	Musculoskeletal disease|Nervous system disease	8.23e-10	6.65e-07	3	IL1B|IL6|TNF	8/44767 genes: 0.02%
Skin Diseases, Eczematous	MESH:D017443	Skin disease	8.36e-10	6.76e-07	5	BCL2|GSR|IL1B|IL6|TNF	183/44767 genes: 0.41%
Deficiency Diseases	MESH:D003677	Nutrition disorder	9.29e-10	7.51e-07	4	CAT|GSR|PARP1|TNF	54/44767 genes: 0.12%
Vector Borne Diseases	MESH:D000079426		9.29e-10	7.51e-07	4	IL1B|IL6|NOS2|TNF	54/44767 genes: 0.12%
Bile Duct Diseases	MESH:D001649	Digestive system disease	1.01e-09	8.16e-07	5	CAT|IL1B|IL6|NOS2|TNF	190/44767 genes: 0.42%
Neoplasms	MESH:D009369	Cancer	1.06e-09	8.55e-07	10	BAX|BCL2|CAT|CDH1|CTNNB1|IL1B|IL6|NOS2|PARP1|TNF	3792/44767 genes: 8.47%
Hypotension	MESH:D007022	Cardiovascular disease	1.16e-09	9.37e-07	4	CAT|IL1B|IL6|TNF	57/44767 genes: 0.13%
Pulmonary Edema	MESH:D011654	Respiratory tract disease	1.23e-09	9.98e-07	3	CAT|PARP1|TNF	9/44767 genes: 0.02%
Malnutrition	MESH:D044342	Nutrition disorder	1.34e-09	1.08e-06	4	CAT|GSR|PARP1|TNF	59/44767 genes: 0.13%
Colitis, Ulcerative	MESH:D003093	Digestive system disease	1.43e-09	1.16e-06	4	CASP3|CDH1|IL1B|TNF	60/44767 genes: 0.13%
Atherosclerosis	MESH:D050197	Cardiovascular disease	1.75e-09	1.41e-06	4	IL6|NOS2|PARP1|TNF	63/44767 genes: 0.14%
Hematologic Diseases	MESH:D006402	Blood disease	1.87e-09	1.51e-06	6	BCL2|GSR|IL1B|IL6|PARP1|TNF	511/44767 genes: 1.14%
Drug Eruptions	MESH:D003875	Immune system disease|Skin disease	1.99e-09	1.6e-06	4	CTNNB1|NOS2|PARP1|TNF	65/44767 genes: 0.15%
Status Epilepticus	MESH:D013226	Nervous system disease|Signs and symptoms	2.25e-09	1.82e-06	4	CASP3|CAT|NOS2|TNF	67/44767 genes: 0.15%
Premature Birth	MESH:D047928	Pregnancy complication	2.42e-09	1.96e-06	3	CAT|IL6|TNF	11/44767 genes: 0.02%
Calcinosis	MESH:D002114	Metabolic disease	2.69e-09	2.17e-06	4	CASP3|CTNNB1|IL1B|TNF	70/44767 genes: 0.16%
Osteoporosis	MESH:D010024	Metabolic disease|Musculoskeletal disease	3.19e-09	2.58e-06	4	CAT|IL1B|IL6|TNF	73/44767 genes: 0.16%
Obstetric Labor, Premature	MESH:D007752	Pregnancy complication	3.23e-09	2.61e-06	3	CAT|IL6|TNF	12/44767 genes: 0.03%
Urogenital Neoplasms	MESH:D014565	Cancer|Urogenital disease (female)|Urogenital disease (male)	3.24e-09	2.62e-06	7	BAX|BCL2|CDH1|CTNNB1|IL6|PARP1|TNF	1076/44767 genes: 2.40%
Neoplasm Metastasis	MESH:D009362	Cancer|Pathology (process)	3.33e-09	2.69e-06	5	CAT|CDH1|CTNNB1|IL6|TNF	241/44767 genes: 0.54%
Anemia, Hemolytic	MESH:D000743	Blood disease	3.37e-09	2.72e-06	4	GSR|IL1B|IL6|TNF	74/44767 genes: 0.17%
Retinal Diseases	MESH:D012164	Eye disease	3.62e-09	2.92e-06	5	BCL2|CASP3|IL1B|NOS2|TNF	245/44767 genes: 0.55%
Congenital, Hereditary, and Neonatal Diseases and Abnormalities	MESH:D009358		3.84e-09	3.11e-06	9	BCL2|CASP3|CAT|CTNNB1|IL1B|IL6|NOS2|PARP1|TNF	2917/44767 genes: 6.52%
Heat Stroke	MESH:D018883	Wounds and injuries	4.2e-09	3.4e-06	3	IL1B|IL6|TNF	13/44767 genes: 0.03%
Leishmaniasis, Visceral	MESH:D007898	Parasitic disease	4.2e-09	3.4e-06	3	IL1B|IL6|TNF	13/44767 genes: 0.03%
RNA Virus Infections	MESH:D012327	Viral disease	4.6e-09	3.71e-06	5	BAX|BCL2|IL1B|IL6|TNF	257/44767 genes: 0.57%
Occupational Diseases	MESH:D009784	Occupational disease	4.63e-09	3.74e-06	4	IL1B|IL6|NOS2|TNF	80/44767 genes: 0.18%
Neuromuscular Diseases	MESH:D009468	Nervous system disease	4.93e-09	3.98e-06	6	CASP3|CAT|GSR|IL1B|IL6|TNF	601/44767 genes: 1.34%
Hyperemia	MESH:D006940	Cardiovascular disease	5.35e-09	4.32e-06	3	CAT|IL1B|NOS2	14/44767 genes: 0.03%
Manganese Poisoning	MESH:D020149	Nervous system disease	5.35e-09	4.32e-06	3	IL1B|NOS2|TNF	14/44767 genes: 0.03%
Alcohol-Related Disorders	MESH:D019973	Mental disorder|Substance-related disorder	5.92e-09	4.78e-06	4	BCL2|CAT|IL6|TNF	85/44767 genes: 0.19%
Bacterial Infections	MESH:D001424	Bacterial infection or mycosis	6.21e-09	5.02e-06	4	CASP3|CDH1|NOS2|TNF	86/44767 genes: 0.19%
Asbestosis	MESH:D001195	Occupational disease|Respiratory tract disease	6.68e-09	5.4e-06	3	IL1B|NOS2|TNF	15/44767 genes: 0.03%
Heat Stress Disorders	MESH:D018882	Wounds and injuries	6.68e-09	5.4e-06	3	IL1B|IL6|TNF	15/44767 genes: 0.03%
Hyperalgesia	MESH:D006930	Nervous system disease|Signs and symptoms	6.82e-09	5.51e-06	4	IL1B|IL6|NOS2|TNF	88/44767 genes: 0.20%
Myocardial Reperfusion Injury	MESH:D015428	Cardiovascular disease|Pathology (process)	7.14e-09	5.77e-06	4	BAX|CASP3|CAT|NOS2	89/44767 genes: 0.20%
Immunologic Deficiency Syndromes	MESH:D007153	Immune system disease	7.98e-09	6.45e-06	5	BAX|BCL2|IL1B|IL6|TNF	287/44767 genes: 0.64%
Hemolytic-Uremic Syndrome	MESH:D006463	Blood disease|Urogenital disease (female)|Urogenital disease (male)	8.22e-09	6.64e-06	3	IL1B|IL6|TNF	16/44767 genes: 0.04%
Skin Diseases, Parasitic	MESH:D012876	Parasitic disease|Skin disease	8.22e-09	6.64e-06	3	IL1B|IL6|TNF	16/44767 genes: 0.04%
Somatosensory Disorders	MESH:D020886	Nervous system disease|Signs and symptoms	8.53e-09	6.89e-06	4	IL1B|IL6|NOS2|TNF	93/44767 genes: 0.21%
Bacterial Infections and Mycoses	MESH:D001423	Bacterial infection or mycosis	9.3e-09	7.51e-06	4	CASP3|CDH1|NOS2|TNF	95/44767 genes: 0.21%
Obstetric Labor Complications	MESH:D007744	Pregnancy complication	9.98e-09	8.07e-06	3	CAT|IL6|TNF	17/44767 genes: 0.04%
Prostatic Neoplasms	MESH:D011471	Cancer|Urogenital disease (male)	1.01e-08	8.16e-06	6	BAX|BCL2|CDH1|CTNNB1|IL6|PARP1	678/44767 genes: 1.51%
Prostatic Diseases	MESH:D011469	Urogenital disease (male)	1.04e-08	8.37e-06	6	BAX|BCL2|CDH1|CTNNB1|IL6|PARP1	681/44767 genes: 1.52%
Stroke	MESH:D020521	Cardiovascular disease|Nervous system disease	1.05e-08	8.52e-06	4	IL1B|IL6|NOS2|TNF	98/44767 genes: 0.22%
Genital Neoplasms, Male	MESH:D005834	Cancer|Urogenital disease (male)	1.19e-08	9.61e-06	6	BAX|BCL2|CDH1|CTNNB1|IL6|PARP1	697/44767 genes: 1.56%
Drug Hypersensitivity	MESH:D004342	Immune system disease	1.24e-08	1e-05	4	CTNNB1|NOS2|PARP1|TNF	102/44767 genes: 0.23%
Metabolism, Inborn Errors	MESH:D008661	Genetic disease (inborn)|Metabolic disease	1.28e-08	1.04e-05	6	CASP3|CAT|IL1B|IL6|PARP1|TNF	706/44767 genes: 1.58%
Bone Diseases, Metabolic	MESH:D001851	Metabolic disease|Musculoskeletal disease	1.39e-08	1.13e-05	4	CAT|IL1B|IL6|TNF	105/44767 genes: 0.23%
Myositis	MESH:D009220	Musculoskeletal disease|Nervous system disease	1.42e-08	1.15e-05	3	IL1B|IL6|TNF	19/44767 genes: 0.04%
Pleural Diseases	MESH:D010995	Respiratory tract disease	1.42e-08	1.15e-05	3	IL1B|IL6|TNF	19/44767 genes: 0.04%
Virus Diseases	MESH:D014777	Viral disease	1.49e-08	1.2e-05	5	BAX|BCL2|IL1B|IL6|TNF	325/44767 genes: 0.73%
Neoplasms, Experimental	MESH:D009374	Cancer	1.53e-08	1.24e-05	5	BCL2|CDH1|CTNNB1|IL6|TNF	327/44767 genes: 0.73%
Acute Kidney Injury	MESH:D058186	Urogenital disease (female)|Urogenital disease (male)	1.56e-08	1.26e-05	4	BAX|IL6|NOS2|TNF	108/44767 genes: 0.24%
Glomerulonephritis	MESH:D005921	Urogenital disease (female)|Urogenital disease (male)	1.62e-08	1.31e-05	4	IL1B|IL6|NOS2|TNF	109/44767 genes: 0.24%
Thrombotic Microangiopathies	MESH:D057049	Blood disease	1.67e-08	1.35e-05	3	IL1B|IL6|TNF	20/44767 genes: 0.04%
Sexually Transmitted Diseases	MESH:D012749	Pathology (process)	1.88e-08	1.52e-05	4	BAX|IL1B|IL6|TNF	113/44767 genes: 0.25%
Sexually Transmitted Diseases, Viral	MESH:D015229	Pathology (process)|Viral disease	1.88e-08	1.52e-05	4	BAX|IL1B|IL6|TNF	113/44767 genes: 0.25%
Euglenozoa Infections	MESH:D056986	Parasitic disease	1.95e-08	1.58e-05	3	IL1B|IL6|TNF	21/44767 genes: 0.05%
Leishmaniasis	MESH:D007896	Parasitic disease|Skin disease	1.95e-08	1.58e-05	3	IL1B|IL6|TNF	21/44767 genes: 0.05%
Spinal Cord Injuries	MESH:D013119	Nervous system disease|Wounds and injuries	1.95e-08	1.58e-05	3	CASP3|PARP1|TNF	21/44767 genes: 0.05%
Mesothelioma, Malignant	MESH:D000086002	Cancer|Respiratory tract disease	2.47e-08	2e-05	4	BCL2|CTNNB1|IL6|PARP1	121/44767 genes: 0.27%
Adnexal Diseases	MESH:D000291	Urogenital disease (female)	2.47e-08	2e-05	5	BAX|BCL2|CDH1|CTNNB1|IL6	360/44767 genes: 0.80%
Ovarian Diseases	MESH:D010049	Endocrine system disease|Urogenital disease (female)	2.47e-08	2e-05	5	BAX|BCL2|CDH1|CTNNB1|IL6	360/44767 genes: 0.80%
Pleural Neoplasms	MESH:D010997	Cancer|Respiratory tract disease	2.55e-08	2.06e-05	4	BCL2|CTNNB1|IL6|PARP1	122/44767 genes: 0.27%
Hypoglycemia	MESH:D007003	Metabolic disease	2.6e-08	2.1e-05	3	GSR|IL1B|TNF	23/44767 genes: 0.05%
Shock	MESH:D012769	Pathology (process)	2.6e-08	2.1e-05	3	IL6|NOS2|TNF	23/44767 genes: 0.05%
Sensation Disorders	MESH:D012678	Nervous system disease|Signs and symptoms	2.69e-08	2.17e-05	5	CTNNB1|IL1B|IL6|NOS2|TNF	366/44767 genes: 0.82%
Lymphatic Diseases	MESH:D008206	Lymphatic disease	2.8e-08	2.26e-05	5	BAX|BCL2|CAT|CTNNB1|IL6	369/44767 genes: 0.82%
Sarcoma	MESH:D012509	Cancer	2.82e-08	2.28e-05	4	BCL2|CTNNB1|IL6|TNF	125/44767 genes: 0.28%
Nephritis	MESH:D009393	Urogenital disease (female)|Urogenital disease (male)	2.91e-08	2.35e-05	4	IL1B|IL6|NOS2|TNF	126/44767 genes: 0.28%
Endocrine Gland Neoplasms	MESH:D004701	Cancer|Endocrine system disease	3.88e-08	3.13e-05	5	CDH1|CTNNB1|IL1B|IL6|TNF	394/44767 genes: 0.88%
Substance-Related Disorders	MESH:D019966	Mental disorder|Substance-related disorder	4.28e-08	3.46e-05	5	BCL2|CAT|IL6|NOS2|TNF	402/44767 genes: 0.90%
Heavy Metal Poisoning	MESH:D000075322		4.29e-08	3.46e-05	3	IL1B|NOS2|TNF	27/44767 genes: 0.06%
Spondylarthritis	MESH:D025241	Musculoskeletal disease	4.29e-08	3.46e-05	3	IL6|NOS2|TNF	27/44767 genes: 0.06%
Spondylitis	MESH:D013166	Musculoskeletal disease	4.29e-08	3.46e-05	3	IL6|NOS2|TNF	27/44767 genes: 0.06%
Precancerous Conditions	MESH:D011230	Cancer	4.32e-08	3.49e-05	4	CAT|CDH1|CTNNB1|IL6	139/44767 genes: 0.31%
Cerebral Hemorrhage	MESH:D002543	Cardiovascular disease|Nervous system disease|Pathology (process)	4.8e-08	3.88e-05	3	BAX|BCL2|CASP3	28/44767 genes: 0.06%
Arteriosclerosis	MESH:D001161	Cardiovascular disease	4.84e-08	3.91e-05	4	IL6|NOS2|PARP1|TNF	143/44767 genes: 0.32%
Thoracic Injuries	MESH:D013898	Wounds and injuries	5.36e-08	4.33e-05	3	IL6|PARP1|TNF	29/44767 genes: 0.06%
Mitochondrial Diseases	MESH:D028361	Metabolic disease	5.87e-08	4.74e-05	4	IL1B|IL6|NOS2|TNF	150/44767 genes: 0.34%
Fever	MESH:D005334	Signs and symptoms	5.95e-08	4.81e-05	3	IL1B|IL6|TNF	30/44767 genes: 0.07%
Lymphoma, Non-Hodgkin	MESH:D008228	Cancer|Immune system disease|Lymphatic disease	6.19e-08	5e-05	4	BAX|BCL2|CAT|CTNNB1	152/44767 genes: 0.34%
Arterial Occlusive Diseases	MESH:D001157	Cardiovascular disease	6.52e-08	5.27e-05	4	IL6|NOS2|PARP1|TNF	154/44767 genes: 0.34%
Sarcoma, Kaposi	MESH:D012514	Cancer|Viral disease	6.59e-08	5.32e-05	2	BCL2|IL6	2/44767 genes: 0.00%
Neuroinflammatory Diseases	MESH:D000090862	Nervous system disease|Pathology (process)	7.27e-08	5.87e-05	3	IL1B|IL6|TNF	32/44767 genes: 0.07%
Skin Diseases, Infectious	MESH:D012874	Skin disease	7.99e-08	6.46e-05	3	IL1B|IL6|TNF	33/44767 genes: 0.07%
Arthritis	MESH:D001168	Musculoskeletal disease	8.28e-08	6.69e-05	5	CAT|IL1B|IL6|NOS2|TNF	459/44767 genes: 1.03%
Heredodegenerative Disorders, Nervous System	MESH:D020271	Genetic disease (inborn)|Nervous system disease	8.37e-08	6.76e-05	5	CASP3|IL1B|IL6|PARP1|TNF	460/44767 genes: 1.03%
Aortic Diseases	MESH:D001018	Cardiovascular disease	8.76e-08	7.08e-05	3	CAT|NOS2|PARP1	34/44767 genes: 0.08%
Uremia	MESH:D014511	Urogenital disease (female)|Urogenital disease (male)	8.76e-08	7.08e-05	3	IL1B|IL6|TNF	34/44767 genes: 0.08%
Hepatolenticular Degeneration	MESH:D006527	Digestive system disease|Genetic disease (inborn)|Metabolic disease|Nervous system disease	9.58e-08	7.74e-05	3	CASP3|IL6|TNF	35/44767 genes: 0.08%
Hyperthyroidism	MESH:D006980	Endocrine system disease	9.58e-08	7.74e-05	3	CAT|GSR|IL6	35/44767 genes: 0.08%
Lymphoma	MESH:D008223	Cancer|Immune system disease|Lymphatic disease	1.09e-07	8.81e-05	4	BAX|BCL2|CAT|CTNNB1	175/44767 genes: 0.39%
COVID-19	MESH:D000086382	Respiratory tract disease|Viral disease	1.14e-07	9.19e-05	3	IL1B|IL6|TNF	37/44767 genes: 0.08%
Multiple Myeloma	MESH:D009101	Blood disease|Cancer|Cardiovascular disease|Immune system disease	1.23e-07	9.98e-05	3	BCL2|IL6|PARP1	38/44767 genes: 0.08%
Pneumonia, Viral	MESH:D011024	Respiratory tract disease|Viral disease	1.23e-07	9.98e-05	3	IL1B|IL6|TNF	38/44767 genes: 0.08%
Neoplasms, Plasma Cell	MESH:D054219	Cancer	1.34e-07	0.000108	3	BCL2|IL6|PARP1	39/44767 genes: 0.09%
Arthritis, Rheumatoid	MESH:D001172	Connective tissue disease|Immune system disease|Musculoskeletal disease	1.36e-07	0.00011	4	CAT|IL1B|IL6|TNF	185/44767 genes: 0.41%
Paraproteinemias	MESH:D010265	Blood disease|Immune system disease	1.45e-07	0.000117	3	BCL2|IL6|PARP1	40/44767 genes: 0.09%
Carcinoma, Hepatocellular	MESH:D006528	Cancer|Digestive system disease	1.52e-07	0.000123	5	CAT|CTNNB1|IL6|PARP1|TNF	519/44767 genes: 1.16%
Neuroectodermal Tumors	MESH:D017599	Cancer	1.52e-07	0.000123	5	CAT|CTNNB1|IL1B|PARP1|TNF	519/44767 genes: 1.16%
Connective Tissue Diseases	MESH:D003240	Connective tissue disease	1.55e-07	0.000125	5	CAT|IL1B|IL6|NOS2|TNF	521/44767 genes: 1.16%
Neoplasms, Nerve Tissue	MESH:D009380	Cancer	1.67e-07	0.000135	5	CAT|CTNNB1|IL1B|PARP1|TNF	529/44767 genes: 1.18%
Stevens-Johnson Syndrome	MESH:D013262	Immune system disease|Mouth disease|Skin disease	1.68e-07	0.000136	3	CTNNB1|NOS2|PARP1	42/44767 genes: 0.09%
Joint Diseases	MESH:D007592	Musculoskeletal disease	1.7e-07	0.000138	5	CAT|IL1B|IL6|NOS2|TNF	531/44767 genes: 1.19%
Hypertrophy	MESH:D006984	Pathology (anatomical condition)	1.75e-07	0.000142	4	CTNNB1|IL1B|NOS2|TNF	197/44767 genes: 0.44%
Erythema Multiforme	MESH:D004892	Skin disease	1.8e-07	0.000146	3	CTNNB1|NOS2|PARP1	43/44767 genes: 0.10%
Ventricular Dysfunction	MESH:D018754	Cardiovascular disease	1.94e-07	0.000156	3	CTNNB1|IL6|TNF	44/44767 genes: 0.10%
Protein Deficiency	MESH:D011488	Nutrition disorder	1.98e-07	0.00016	2	CAT|GSR	3/44767 genes: 0.01%
Soft Tissue Neoplasms	MESH:D012983	Cancer	1.98e-07	0.00016	2	BCL2|TNF	3/44767 genes: 0.01%
Neoplasms, Germ Cell and Embryonal	MESH:D009373	Cancer	2.01e-07	0.000162	5	CAT|CTNNB1|IL1B|PARP1|TNF	549/44767 genes: 1.23%
Brain Diseases, Metabolic, Inborn	MESH:D020739	Genetic disease (inborn)|Metabolic disease|Nervous system disease	2.01e-07	0.000163	4	CASP3|IL1B|IL6|TNF	204/44767 genes: 0.46%
Pulmonary Disease, Chronic Obstructive	MESH:D029424	Pathology (process)|Respiratory tract disease	2.07e-07	0.000168	3	IL6|NOS2|TNF	45/44767 genes: 0.10%
Stomatitis	MESH:D013280	Mouth disease	2.07e-07	0.000168	3	CTNNB1|NOS2|PARP1	45/44767 genes: 0.10%
Glioma	MESH:D005910	Cancer	2.18e-07	0.000176	4	CAT|CTNNB1|IL1B|TNF	208/44767 genes: 0.46%
Hepatitis, Chronic	MESH:D006521	Digestive system disease|Pathology (process)	2.22e-07	0.000179	3	CASP3|CAT|IL6	46/44767 genes: 0.10%
Neoplasms, Connective and Soft Tissue	MESH:D018204	Cancer	2.26e-07	0.000183	4	BCL2|CTNNB1|IL6|TNF	210/44767 genes: 0.47%
Kidney Failure, Chronic	MESH:D007676	Pathology (process)|Urogenital disease (female)|Urogenital disease (male)	2.69e-07	0.000218	3	CAT|IL6|TNF	49/44767 genes: 0.11%
Neoplasms, Vascular Tissue	MESH:D009383	Cancer	2.69e-07	0.000218	3	BCL2|CTNNB1|IL6	49/44767 genes: 0.11%
Diabetes Mellitus, Type 1	MESH:D003922	Endocrine system disease|Immune system disease|Metabolic disease	2.86e-07	0.000231	3	CAT|IL6|TNF	50/44767 genes: 0.11%
Erythema	MESH:D004890	Signs and symptoms|Skin disease	3.04e-07	0.000246	3	CTNNB1|NOS2|PARP1	51/44767 genes: 0.11%
Spinal Cord Diseases	MESH:D013118	Nervous system disease	3.09e-07	0.000249	4	CASP3|GSR|PARP1|TNF	227/44767 genes: 0.51%
Genital Diseases, Female	MESH:D005831	Urogenital disease (female)	3.12e-07	0.000252	5	BAX|BCL2|CDH1|CTNNB1|IL6	600/44767 genes: 1.34%
Pancreatic Diseases	MESH:D010182	Digestive system disease	3.25e-07	0.000263	4	CDH1|CTNNB1|PARP1|TNF	230/44767 genes: 0.51%
Neurobehavioral Manifestations	MESH:D019954	Nervous system disease|Signs and symptoms	3.33e-07	0.000269	5	BCL2|CTNNB1|IL1B|IL6|PARP1	608/44767 genes: 1.36%
Brain Diseases, Metabolic	MESH:D001928	Metabolic disease|Nervous system disease	3.61e-07	0.000291	4	CASP3|IL1B|IL6|TNF	236/44767 genes: 0.53%
Coronaviridae Infections	MESH:D003333	Viral disease	3.62e-07	0.000293	3	IL1B|IL6|TNF	54/44767 genes: 0.12%
Coronavirus Infections	MESH:D018352	Viral disease	3.62e-07	0.000293	3	IL1B|IL6|TNF	54/44767 genes: 0.12%
Nidovirales Infections	MESH:D030341	Viral disease	3.62e-07	0.000293	3	IL1B|IL6|TNF	54/44767 genes: 0.12%
Renal Insufficiency, Chronic	MESH:D051436	Pathology (process)|Urogenital disease (female)|Urogenital disease (male)	3.62e-07	0.000293	3	CAT|IL6|TNF	54/44767 genes: 0.12%
Arthritis, Infectious	MESH:D001170	Musculoskeletal disease	3.95e-07	0.000319	2	IL1B|TNF	4/44767 genes: 0.01%
Myocardial Stunning	MESH:D017682	Cardiovascular disease|Signs and symptoms	3.95e-07	0.000319	2	NOS2|TNF	4/44767 genes: 0.01%
Pregnancy Complications, Cardiovascular	MESH:D011249	Cardiovascular disease|Pregnancy complication	3.95e-07	0.000319	2	IL6|TNF	4/44767 genes: 0.01%
Ureteral Calculi	MESH:D014514	Pathology (anatomical condition)|Urogenital disease (female)|Urogenital disease (male)	3.95e-07	0.000319	2	CAT|GSR	4/44767 genes: 0.01%
Ureterolithiasis	MESH:D053039	Urogenital disease (female)|Urogenital disease (male)	3.95e-07	0.000319	2	CAT|GSR	4/44767 genes: 0.01%
Thrombocytopenia	MESH:D013921	Blood disease	4.05e-07	0.000327	3	IL1B|IL6|TNF	56/44767 genes: 0.13%
Peripheral Nervous System Diseases	MESH:D010523	Nervous system disease	4.47e-07	0.000361	4	CASP3|CAT|IL6|TNF	249/44767 genes: 0.56%
Memory Disorders	MESH:D008569	Nervous system disease|Signs and symptoms	4.5e-07	0.000364	3	BCL2|IL1B|IL6	58/44767 genes: 0.13%
Neoplasms, Neuroepithelial	MESH:D018302	Cancer	4.54e-07	0.000367	4	CAT|CTNNB1|IL1B|TNF	250/44767 genes: 0.56%
Pregnancy Complications	MESH:D011248	Pregnancy complication	4.54e-07	0.000367	4	CAT|IL1B|IL6|TNF	250/44767 genes: 0.56%
Autistic Disorder	MESH:D001321	Mental disorder	4.68e-07	0.000378	4	BCL2|CAT|IL6|NOS2	252/44767 genes: 0.56%
Mitochondrial Myopathies	MESH:D017240	Metabolic disease|Musculoskeletal disease|Nervous system disease	5.52e-07	0.000446	3	IL1B|IL6|TNF	62/44767 genes: 0.14%
Metal Metabolism, Inborn Errors	MESH:D008664	Genetic disease (inborn)|Metabolic disease	6.37e-07	0.000514	3	CASP3|IL6|TNF	65/44767 genes: 0.15%
Sex Chromosome Disorders of Sex Development	MESH:D058533	Congenital abnormality|Endocrine system disease|Genetic disease (inborn)|Urogenital disease (female)|Urogenital disease (male)	6.58e-07	0.000532	2	CAT|NOS2	5/44767 genes: 0.01%
Turner Syndrome	MESH:D014424	Cardiovascular disease|Congenital abnormality|Endocrine system disease|Genetic disease (inborn)|Urogenital disease (female)|Urogenital disease (male)	6.58e-07	0.000532	2	CAT|NOS2	5/44767 genes: 0.01%
Skin Diseases, Vesiculobullous	MESH:D012872	Skin disease	6.67e-07	0.000539	3	CTNNB1|NOS2|PARP1	66/44767 genes: 0.15%
Hemostatic Disorders	MESH:D020141	Blood disease|Cardiovascular disease	6.98e-07	0.000564	3	BCL2|IL6|PARP1	67/44767 genes: 0.15%
Blood Protein Disorders	MESH:D001796	Blood disease	7.97e-07	0.000644	3	BCL2|IL6|PARP1	70/44767 genes: 0.16%
Amebiasis	MESH:D000562	Parasitic disease	9.87e-07	0.000798	2	IL1B|IL6	6/44767 genes: 0.01%
Burns, Chemical	MESH:D002057	Wounds and injuries	9.87e-07	0.000798	2	IL1B|IL6	6/44767 genes: 0.01%
Dermatomyositis	MESH:D003882	Connective tissue disease|Musculoskeletal disease|Nervous system disease|Skin disease	9.87e-07	0.000798	2	IL1B|TNF	6/44767 genes: 0.01%
Entamoebiasis	MESH:D004749	Parasitic disease	9.87e-07	0.000798	2	IL1B|IL6	6/44767 genes: 0.01%
Osteoarthritis, Spine	MESH:D055013	Musculoskeletal disease	9.87e-07	0.000798	2	IL6|TNF	6/44767 genes: 0.01%
Shock, Septic	MESH:D012772	Pathology (process)	9.87e-07	0.000798	2	NOS2|TNF	6/44767 genes: 0.01%
Autism Spectrum Disorder	MESH:D000067877	Mental disorder	1.05e-06	0.000852	4	BCL2|CAT|IL6|NOS2	309/44767 genes: 0.69%
Stomach Neoplasms	MESH:D013274	Cancer|Digestive system disease	1.05e-06	0.000852	4	CDH1|IL1B|IL6|TNF	309/44767 genes: 0.69%
Heavy Metal Poisoning, Nervous System	MESH:D020260	Nervous system disease	1.06e-06	0.00086	3	IL1B|NOS2|TNF	77/44767 genes: 0.17%
Child Development Disorders, Pervasive	MESH:D002659	Mental disorder	1.08e-06	0.000875	4	BCL2|CAT|IL6|NOS2	311/44767 genes: 0.69%
Urologic Neoplasms	MESH:D014571	Cancer|Urogenital disease (female)|Urogenital disease (male)	1.23e-06	0.000992	4	CDH1|CTNNB1|IL6|TNF	321/44767 genes: 0.72%
Shock, Hemorrhagic	MESH:D012771	Pathology (process)	1.38e-06	0.00112	2	IL6|TNF	7/44767 genes: 0.02%
Non-alcoholic Fatty Liver Disease	MESH:D065626	Digestive system disease	1.38e-06	0.00112	3	CAT|IL1B|TNF	84/44767 genes: 0.19%
Animal Diseases	MESH:D000820	Animal disease	1.58e-06	0.00128	4	CDH1|CTNNB1|IL1B|TNF	342/44767 genes: 0.76%
Blood Platelet Disorders	MESH:D001791	Blood disease	1.59e-06	0.00129	3	IL1B|IL6|TNF	88/44767 genes: 0.20%
Anthracosis	MESH:D055008	Respiratory tract disease	1.84e-06	0.00149	2	IL1B|TNF	8/44767 genes: 0.02%
Leishmaniasis, Cutaneous	MESH:D016773	Parasitic disease|Skin disease	1.84e-06	0.00149	2	IL1B|TNF	8/44767 genes: 0.02%
Diabetes Complications	MESH:D048909	Endocrine system disease	1.95e-06	0.00157	3	CASP3|CAT|TNF	94/44767 genes: 0.21%
Bone Diseases, Developmental	MESH:D001848	Musculoskeletal disease	2.07e-06	0.00167	4	BCL2|CAT|NOS2|TNF	366/44767 genes: 0.82%
Urogenital Abnormalities	MESH:D014564	Congenital abnormality|Urogenital disease (female)|Urogenital disease (male)	2.27e-06	0.00184	3	CASP3|CAT|NOS2	99/44767 genes: 0.22%
Thyroid Neoplasms	MESH:D013964	Cancer|Endocrine system disease	2.34e-06	0.00189	3	IL1B|IL6|TNF	100/44767 genes: 0.22%
Silicosis	MESH:D012829	Occupational disease|Respiratory tract disease	2.37e-06	0.00191	2	IL1B|NOS2	9/44767 genes: 0.02%
Neuroectodermal Tumors, Primitive	MESH:D018242	Cancer	2.96e-06	0.00239	3	CTNNB1|IL1B|TNF	108/44767 genes: 0.24%
Coxsackievirus Infections	MESH:D003384	Viral disease	2.96e-06	0.00239	2	IL6|TNF	10/44767 genes: 0.02%
Rheumatic Diseases	MESH:D012216	Connective tissue disease|Musculoskeletal disease	3.33e-06	0.00269	4	CAT|IL1B|IL6|TNF	413/44767 genes: 0.92%
Berylliosis	MESH:D001607	Occupational disease|Respiratory tract disease	3.62e-06	0.00292	2	IL6|TNF	11/44767 genes: 0.02%
Brain Edema	MESH:D001929	Nervous system disease	3.62e-06	0.00292	2	NOS2|TNF	11/44767 genes: 0.02%
Marfan Syndrome	MESH:D008382	Cardiovascular disease|Congenital abnormality|Connective tissue disease|Genetic disease (inborn)|Musculoskeletal disease	3.62e-06	0.00292	2	CAT|NOS2	11/44767 genes: 0.02%
Hemorrhagic Disorders	MESH:D006474	Blood disease	3.86e-06	0.00312	3	BCL2|IL6|PARP1	118/44767 genes: 0.26%
Osteoarthritis	MESH:D010003	Musculoskeletal disease	3.96e-06	0.0032	3	IL1B|IL6|TNF	119/44767 genes: 0.27%
Cachexia	MESH:D002100	Signs and symptoms	4.34e-06	0.00351	2	IL6|TNF	12/44767 genes: 0.03%
Facial Nerve Diseases	MESH:D005155	Mouth disease|Nervous system disease	4.34e-06	0.00351	2	IL1B|TNF	12/44767 genes: 0.03%
Facial Neuralgia	MESH:D005156	Mouth disease|Nervous system disease	4.34e-06	0.00351	2	IL1B|TNF	12/44767 genes: 0.03%
Radiation Injuries, Experimental	MESH:D011833	Wounds and injuries	4.34e-06	0.00351	2	IL1B|TNF	12/44767 genes: 0.03%
Trigeminal Nerve Diseases	MESH:D020433	Mouth disease|Nervous system disease	4.34e-06	0.00351	2	IL1B|TNF	12/44767 genes: 0.03%
Trigeminal Neuralgia	MESH:D014277	Mouth disease|Nervous system disease	4.34e-06	0.00351	2	IL1B|TNF	12/44767 genes: 0.03%
Urinary Calculi	MESH:D014545	Pathology (anatomical condition)|Urogenital disease (female)|Urogenital disease (male)	4.34e-06	0.00351	2	CAT|GSR	12/44767 genes: 0.03%
Arthritis, Psoriatic	MESH:D015535	Musculoskeletal disease|Skin disease	5.13e-06	0.00414	2	NOS2|TNF	13/44767 genes: 0.03%
Emaciation	MESH:D004614	Signs and symptoms	5.13e-06	0.00414	2	IL6|TNF	13/44767 genes: 0.03%
Diabetic Neuropathies	MESH:D003929	Endocrine system disease|Nervous system disease	5.98e-06	0.00483	2	CASP3|CAT	14/44767 genes: 0.03%
Sex Chromosome Disorders	MESH:D025064	Congenital abnormality|Genetic disease (inborn)	5.98e-06	0.00483	2	CAT|NOS2	14/44767 genes: 0.03%
Pancreatic Neoplasms	MESH:D010190	Cancer|Digestive system disease|Endocrine system disease	6.59e-06	0.00532	3	CDH1|CTNNB1|TNF	141/44767 genes: 0.31%
Dermatitis, Contact	MESH:D003877	Skin disease	7.78e-06	0.00628	3	BCL2|GSR|TNF	149/44767 genes: 0.33%
Enterovirus Infections	MESH:D004769	Viral disease	7.89e-06	0.00637	2	IL6|TNF	16/44767 genes: 0.04%
Hypercalcemia	MESH:D006934	Metabolic disease	7.89e-06	0.00637	2	IL6|TNF	16/44767 genes: 0.04%
Hypothermia	MESH:D007035	Signs and symptoms	7.89e-06	0.00637	2	NOS2|TNF	16/44767 genes: 0.04%
Leukemia, Lymphoid	MESH:D007945	Cancer|Immune system disease|Lymphatic disease	8.09e-06	0.00654	3	BAX|BCL2|IL6	151/44767 genes: 0.34%
Ovarian Neoplasms	MESH:D010051	Cancer|Endocrine system disease|Urogenital disease (female)	8.75e-06	0.00707	3	CDH1|CTNNB1|IL6	155/44767 genes: 0.35%
Calculi	MESH:D002137	Pathology (anatomical condition)	8.94e-06	0.00722	2	CAT|GSR	17/44767 genes: 0.04%
Picornaviridae Infections	MESH:D010850	Viral disease	8.94e-06	0.00722	2	IL6|TNF	17/44767 genes: 0.04%
Fatty Liver	MESH:D005234	Digestive system disease	9.27e-06	0.00749	3	CAT|IL1B|TNF	158/44767 genes: 0.35%
Anorexia	MESH:D000855	Signs and symptoms	1.01e-05	0.00812	2	IL1B|TNF	18/44767 genes: 0.04%
Myocarditis	MESH:D009205	Cardiovascular disease	1.01e-05	0.00812	2	IL6|TNF	18/44767 genes: 0.04%
Oral Submucous Fibrosis	MESH:D009914	Mouth disease	1.01e-05	0.00812	2	IL6|TNF	18/44767 genes: 0.04%
Autoimmune Diseases	MESH:D001327	Immune system disease	1.05e-05	0.00846	4	CAT|IL1B|IL6|TNF	552/44767 genes: 1.23%
Esophageal Neoplasms	MESH:D004938	Cancer|Digestive system disease	1.11e-05	0.009	3	BAX|BCL2|NOS2	168/44767 genes: 0.38%
